# Supplementary material
Source: PubMed Central journal article supplement (PMC3650523)
Supplement: JB.02151-12_zjb999092598so1.pdf [file JB.02151-12_zjb999092598so1.pdf]

**TABLE S1:** Summary of sequencing statistics

| Sample             | Number of uniquely mapped reads | Number of reads mapped to locus tags | Locus tags mapped to total uniquely mapped reads (%) |
|--------------------|---------------------------------|--------------------------------------|------------------------------------------------------|
| <b>Replicate 1</b> |                                 |                                      |                                                      |
| Wild type          | 7215112                         | 4171891                              | 58                                                   |
| $\Delta vttR_A$    | 6153795                         | 3472125                              | 56                                                   |
| $\Delta vttR_B$    | 10203545                        | 5988503                              | 59                                                   |
| <b>Replicate 2</b> |                                 |                                      |                                                      |
| Wild type          | 3723062                         | 2631182                              | 71                                                   |
| $\Delta vttR_A$    | 3525001                         | 2307039                              | 65                                                   |
| $\Delta vttR_B$    | 2742491                         | 1903158                              | 69                                                   |

**TABLE S2.** RPKM values (rounded to nearest integer) obtained from RNA-Seq replicate 1.

| <b>Locus tag</b> | <b>Wild type</b> | <b><math>\Delta vttR_A</math></b> | <b><math>\Delta vttR_B</math></b> |
|------------------|------------------|-----------------------------------|-----------------------------------|
| A33_0001         | 25               | 34                                | 21                                |
| A33_0002         | 0                | 0                                 | 0                                 |
| A33_0003         | 8                | 6                                 | 5                                 |
| A33_0004         | 12               | 15                                | 12                                |
| A33_0005         | 46               | 37                                | 13                                |
| A33_0006         | 89               | 67                                | 45                                |
| A33_0007         | 5                | 6                                 | 4                                 |
| A33_0008         | 519              | 422                               | 564                               |
| A33_0009         | 77               | 89                                | 37                                |
| A33_0010         | 818              | 453                               | 492                               |
| A33_0011         | 494              | 359                               | 388                               |
| A33_0012         | 329              | 284                               | 264                               |
| A33_0013         | 394              | 320                               | 280                               |
| A33_0014         | 350              | 434                               | 331                               |
| A33_0015         | 647              | 610                               | 403                               |
| A33_0016         | 405              | 439                               | 327                               |
| A33_0017         | 250              | 217                               | 106                               |
| A33_0018         | 1338             | 1153                              | 1077                              |
| A33_0019         | 181              | 185                               | 138                               |
| A33_0020         | 98               | 87                                | 81                                |
| A33_0021         | 22               | 15                                | 25                                |
| A33_0022         | 21               | 15                                | 16                                |
| A33_0023         | 142              | 129                               | 139                               |
| A33_0024         | 68               | 63                                | 45                                |
| A33_0025         | 45               | 41                                | 32                                |
| A33_0026         | 30               | 31                                | 47                                |
| A33_0027         | 933              | 491                               | 432                               |
| A33_0028         | 15               | 15                                | 18                                |
| A33_0029         | 5                | 5                                 | 3                                 |
| A33_0030         | 17               | 17                                | 17                                |
| A33_0031         | 13               | 19                                | 5                                 |
| A33_0032         | 59               | 60                                | 52                                |
| A33_0033         | 113              | 102                               | 95                                |
| A33_0034         | 138              | 144                               | 104                               |
| A33_0035         | 107              | 100                               | 78                                |
| A33_0036         | 21423            | 30247                             | 4243                              |
| A33_0037         | 6746             | 14835                             | 1674                              |
| A33_0038         | 889              | 785                               | 614                               |
| A33_0039         | 31               | 29                                | 19                                |
| A33_0040         | 37               | 21                                | 37                                |
| A33_0041         | 24               | 18                                | 14                                |
| A33_0042         | 6                | 5                                 | 7                                 |
| A33_0043         | 602              | 268                               | 251                               |
| A33_0044         | 21               | 29                                | 8                                 |
| A33_0045         | 556              | 529                               | 355                               |

|          |       |       |       |
|----------|-------|-------|-------|
| A33_0046 | 30    | 39    | 14    |
| A33_0047 | 32    | 38    | 20    |
| A33_0048 | 40    | 40    | 33    |
| A33_0049 | 35    | 26    | 19    |
| A33_0050 | 16    | 13    | 16    |
| A33_0051 | 13    | 9     | 8     |
| A33_0052 | 7     | 5     | 4     |
| A33_0053 | 7     | 11    | 6     |
| A33_0054 | 35    | 42    | 19    |
| A33_0055 | 7     | 7     | 7     |
| A33_0056 | 81    | 48    | 30    |
| A33_0057 | 251   | 199   | 203   |
| A33_0058 | 1750  | 1690  | 2049  |
| A33_0059 | 47    | 79    | 40    |
| A33_0060 | 66    | 52    | 41    |
| A33_0061 | 15    | 12    | 17    |
| A33_0062 | 14    | 10    | 9     |
| A33_0063 | 19    | 17    | 13    |
| A33_0064 | 24    | 27    | 21    |
| A33_0065 | 16    | 15    | 12    |
| A33_0066 | 522   | 494   | 374   |
| A33_0067 | 8     | 7     | 6     |
| A33_0068 | 194   | 378   | 180   |
| A33_0069 | 182   | 214   | 139   |
| A33_0070 | 99    | 197   | 103   |
| A33_0071 | 32    | 37    | 29    |
| A33_0072 | 37    | 25    | 40    |
| A33_0073 | 57    | 64    | 36    |
| A33_0074 | 34    | 54    | 34    |
| A33_0075 | 31    | 27    | 13    |
| A33_0076 | 30    | 28    | 21    |
| A33_0077 | 44    | 32    | 23    |
| A33_0078 | 0     | 0     | 0     |
| A33_0079 | 24391 | 27739 | 54015 |
| A33_0080 | 0     | 0     | 0     |
| A33_0081 | 5     | 5     | 4     |
| A33_0082 | 0     | 0     | 0     |
| A33_0083 | 0     | 0     | 0     |
| A33_0084 | 2813  | 7889  | 13336 |
| A33_0085 | 53    | 44    | 29    |
| A33_0086 | 7     | 11    | 4     |
| A33_0087 | 5     | 7     | 4     |
| A33_0088 | 4     | 3     | 2     |
| A33_0089 | 5     | 4     | 6     |
| A33_0090 | 7     | 15    | 7     |
| A33_0091 | 7     | 8     | 7     |
| A33_0092 | 37    | 26    | 21    |
| A33_0093 | 7     | 8     | 8     |

|          |      |      |     |
|----------|------|------|-----|
| A33_0094 | 566  | 247  | 643 |
| A33_0095 | 132  | 73   | 93  |
| A33_0096 | 76   | 72   | 41  |
| A33_0097 | 32   | 20   | 21  |
| A33_0098 | 17   | 16   | 20  |
| A33_0099 | 51   | 74   | 98  |
| A33_0100 | 94   | 67   | 88  |
| A33_0101 | 871  | 616  | 928 |
| A33_0102 | 790  | 715  | 498 |
| A33_0103 | 238  | 159  | 136 |
| A33_0104 | 22   | 31   | 16  |
| A33_0105 | 25   | 17   | 18  |
| A33_0106 | 19   | 24   | 29  |
| A33_0107 | 39   | 39   | 46  |
| A33_0108 | 101  | 110  | 71  |
| A33_0109 | 72   | 70   | 65  |
| A33_0110 | 266  | 281  | 336 |
| A33_0111 | 107  | 135  | 108 |
| A33_0112 | 16   | 10   | 10  |
| A33_0113 | 16   | 21   | 17  |
| A33_0114 | 69   | 122  | 100 |
| A33_0115 | 59   | 46   | 84  |
| A33_0116 | 20   | 19   | 16  |
| A33_0117 | 10   | 15   | 14  |
| A33_0118 | 33   | 29   | 24  |
| A33_0119 | 99   | 59   | 42  |
| A33_0120 | 78   | 96   | 57  |
| A33_0121 | 81   | 74   | 55  |
| A33_0123 | 6    | 9    | 9   |
| A33_0124 | 10   | 9    | 4   |
| A33_0125 | 0    | 6    | 1   |
| A33_0126 | 87   | 96   | 38  |
| A33_0127 | 20   | 14   | 7   |
| A33_0128 | 4    | 0    | 3   |
| A33_0130 | 40   | 45   | 23  |
| A33_0131 | 1220 | 1230 | 730 |
| A33_0132 | 23   | 22   | 13  |
| A33_0133 | 26   | 34   | 22  |
| A33_0134 | 63   | 56   | 53  |
| A33_0135 | 46   | 43   | 21  |
| A33_0136 | 82   | 64   | 69  |
| A33_0137 | 26   | 22   | 26  |
| A33_0138 | 189  | 177  | 146 |
| A33_0139 | 39   | 38   | 60  |
| A33_0140 | 6    | 3    | 1   |
| A33_0141 | 159  | 157  | 119 |
| A33_0142 | 143  | 142  | 65  |
| A33_0143 | 126  | 112  | 99  |

|          |      |      |      |
|----------|------|------|------|
| A33_0144 | 98   | 122  | 61   |
| A33_0145 | 131  | 155  | 107  |
| A33_0146 | 43   | 56   | 26   |
| A33_0147 | 46   | 59   | 31   |
| A33_0148 | 46   | 42   | 32   |
| A33_0149 | 21   | 23   | 18   |
| A33_0150 | 20   | 30   | 25   |
| A33_0151 | 21   | 24   | 19   |
| A33_0152 | 33   | 32   | 27   |
| A33_0153 | 50   | 52   | 30   |
| A33_0154 | 13   | 16   | 5    |
| A33_0155 | 31   | 30   | 24   |
| A33_0156 | 58   | 31   | 24   |
| A33_0157 | 8    | 11   | 15   |
| A33_0158 | 244  | 289  | 187  |
| A33_0159 | 6    | 3    | 6    |
| A33_0160 | 35   | 40   | 22   |
| A33_0161 | 116  | 116  | 51   |
| A33_0162 | 113  | 111  | 89   |
| A33_0163 | 43   | 48   | 37   |
| A33_0164 | 39   | 28   | 38   |
| A33_0165 | 46   | 45   | 54   |
| A33_0166 | 300  | 266  | 157  |
| A33_0168 | 48   | 47   | 22   |
| A33_0169 | 16   | 11   | 9    |
| A33_0170 | 20   | 21   | 18   |
| A33_0171 | 26   | 29   | 16   |
| A33_0172 | 198  | 155  | 109  |
| A33_0173 | 36   | 24   | 18   |
| A33_0174 | 0    | 0    | 0    |
| A33_0175 | 0    | 0    | 0    |
| A33_0176 | 0    | 0    | 0    |
| A33_0177 | 0    | 0    | 0    |
| A33_0178 | 0    | 0    | 0    |
| A33_0179 | 3    | 2    | 0    |
| A33_0180 | 9    | 7    | 5    |
| A33_0181 | 34   | 44   | 24   |
| A33_0182 | 484  | 428  | 272  |
| A33_0183 | 41   | 37   | 40   |
| A33_0184 | 35   | 28   | 29   |
| A33_0185 | 155  | 90   | 50   |
| A33_0186 | 23   | 23   | 14   |
| A33_0187 | 2    | 0    | 0    |
| A33_0188 | 1913 | 1298 | 3127 |
| A33_0189 | 264  | 120  | 177  |
| A33_0190 | 0    | 0    | 1    |
| A33_0191 | 9    | 2    | 2    |
| A33_0192 | 131  | 125  | 84   |

|          |     |     |     |
|----------|-----|-----|-----|
| A33_0193 | 394 | 371 | 216 |
| A33_0194 | 26  | 24  | 15  |
| A33_0195 | 38  | 44  | 21  |
| A33_0196 | 42  | 26  | 30  |
| A33_0197 | 85  | 76  | 49  |
| A33_0198 | 25  | 30  | 29  |
| A33_0199 | 62  | 45  | 35  |
| A33_0200 | 21  | 20  | 22  |
| A33_0201 | 49  | 42  | 13  |
| A33_0202 | 179 | 207 | 143 |
| A33_0203 | 18  | 25  | 12  |
| A33_0204 | 2   | 3   | 1   |
| A33_0205 | 0   | 1   | 0   |
| A33_0206 | 11  | 7   | 8   |
| A33_0207 | 15  | 18  | 11  |
| A33_0208 | 6   | 5   | 6   |
| A33_0209 | 9   | 13  | 14  |
| A33_0210 | 8   | 8   | 17  |
| A33_0211 | 2   | 2   | 2   |
| A33_0212 | 3   | 3   | 6   |
| A33_0213 | 5   | 5   | 8   |
| A33_0214 | 4   | 5   | 7   |
| A33_0215 | 4   | 5   | 3   |
| A33_0216 | 4   | 2   | 2   |
| A33_0217 | 15  | 22  | 14  |
| A33_0218 | 25  | 13  | 17  |
| A33_0219 | 7   | 7   | 6   |
| A33_0220 | 12  | 11  | 10  |
| A33_0221 | 34  | 21  | 36  |
| A33_0222 | 24  | 17  | 39  |
| A33_0223 | 1   | 0   | 1   |
| A33_0224 | 2   | 2   | 1   |
| A33_0225 | 50  | 52  | 28  |
| A33_0226 | 80  | 85  | 56  |
| A33_0227 | 24  | 21  | 19  |
| A33_0228 | 33  | 30  | 33  |
| A33_0229 | 20  | 16  | 18  |
| A33_0230 | 26  | 23  | 12  |
| A33_0231 | 4   | 0   | 0   |
| A33_0232 | 17  | 13  | 9   |
| A33_0233 | 129 | 134 | 78  |
| A33_0234 | 889 | 429 | 622 |
| A33_0235 | 10  | 14  | 7   |
| A33_0236 | 28  | 33  | 23  |
| A33_0237 | 20  | 18  | 9   |
| A33_0238 | 23  | 18  | 15  |
| A33_0239 | 18  | 15  | 16  |
| A33_0240 | 42  | 32  | 22  |

|          |      |      |      |
|----------|------|------|------|
| A33_0241 | 36   | 42   | 27   |
| A33_0242 | 31   | 29   | 17   |
| A33_0243 | 33   | 21   | 20   |
| A33_0244 | 69   | 57   | 41   |
| A33_0245 | 23   | 22   | 19   |
| A33_0246 | 33   | 26   | 18   |
| A33_0247 | 14   | 18   | 18   |
| A33_0248 | 67   | 62   | 56   |
| A33_0249 | 43   | 36   | 49   |
| A33_0250 | 49   | 34   | 22   |
| A33_0251 | 9    | 10   | 5    |
| A33_0252 | 58   | 48   | 24   |
| A33_0253 | 46   | 49   | 47   |
| A33_0254 | 85   | 96   | 102  |
| A33_0255 | 77   | 73   | 73   |
| A33_0256 | 106  | 92   | 86   |
| A33_0257 | 70   | 73   | 69   |
| A33_0258 | 112  | 125  | 86   |
| A33_0259 | 202  | 170  | 141  |
| A33_0260 | 74   | 72   | 48   |
| A33_0261 | 125  | 107  | 106  |
| A33_0262 | 16   | 11   | 14   |
| A33_0264 | 0    | 0    | 1    |
| A33_0265 | 2    | 3    | 1    |
| A33_0266 | 1    | 1    | 1    |
| A33_0267 | 21   | 19   | 26   |
| A33_0268 | 45   | 41   | 58   |
| A33_0269 | 27   | 23   | 29   |
| A33_0270 | 127  | 107  | 152  |
| A33_0271 | 139  | 135  | 138  |
| A33_0272 | 40   | 43   | 26   |
| A33_0273 | 28   | 19   | 21   |
| A33_0274 | 61   | 50   | 52   |
| A33_0275 | 27   | 29   | 20   |
| A33_0276 | 11   | 11   | 13   |
| A33_0277 | 4    | 6    | 7    |
| A33_0278 | 20   | 11   | 26   |
| A33_0279 | 8    | 4    | 10   |
| A33_0280 | 4    | 3    | 2    |
| A33_0281 | 4767 | 1458 | 6018 |
| A33_0282 | 22   | 9    | 22   |
| A33_0283 | 20   | 7    | 24   |
| A33_0284 | 3    | 1    | 3    |
| A33_0285 | 6    | 2    | 4    |
| A33_0286 | 5    | 1    | 6    |
| A33_0287 | 5    | 1    | 4    |
| A33_0288 | 5    | 2    | 6    |
| A33_0289 | 6    | 2    | 6    |

|          |      |      |     |
|----------|------|------|-----|
| A33_0290 | 3    | 0    | 2   |
| A33_0291 | 11   | 7    | 14  |
| A33_0292 | 0    | 0    | 0   |
| A33_0293 | 10   | 6    | 13  |
| A33_0294 | 11   | 9    | 7   |
| A33_0295 | 11   | 13   | 13  |
| A33_0296 | 10   | 13   | 11  |
| A33_0297 | 103  | 98   | 38  |
| A33_0298 | 231  | 220  | 175 |
| A33_0299 | 28   | 21   | 17  |
| A33_0300 | 31   | 37   | 29  |
| A33_0301 | 34   | 34   | 23  |
| A33_0302 | 19   | 13   | 15  |
| A33_0303 | 33   | 27   | 39  |
| A33_0304 | 60   | 33   | 57  |
| A33_0305 | 1409 | 1075 | 751 |
| A33_0306 | 56   | 63   | 54  |
| A33_0307 | 41   | 36   | 25  |
| A33_0308 | 37   | 30   | 24  |
| A33_0309 | 59   | 94   | 33  |
| A33_0310 | 21   | 30   | 17  |
| A33_0311 | 18   | 19   | 15  |
| A33_0312 | 0    | 0    | 0   |
| A33_0313 | 1    | 3    | 1   |
| A33_0314 | 3    | 2    | 2   |
| A33_0315 | 36   | 59   | 19  |
| A33_0316 | 0    | 0    | 0   |
| A33_0317 | 1    | 0    | 0   |
| A33_0318 | 2    | 2    | 3   |
| A33_0319 | 13   | 7    | 9   |
| A33_0320 | 10   | 8    | 7   |
| A33_0321 | 8    | 7    | 8   |
| A33_0322 | 11   | 12   | 9   |
| A33_0323 | 38   | 29   | 23  |
| A33_0324 | 31   | 25   | 16  |
| A33_0325 | 39   | 50   | 49  |
| A33_0326 | 21   | 27   | 13  |
| A33_0327 | 107  | 103  | 107 |
| A33_0328 | 104  | 126  | 144 |
| A33_0329 | 60   | 63   | 56  |
| A33_0330 | 129  | 174  | 41  |
| A33_0331 | 21   | 38   | 8   |
| A33_0332 | 38   | 54   | 13  |
| A33_0333 | 8    | 8    | 8   |
| A33_0334 | 36   | 37   | 32  |
| A33_0335 | 94   | 112  | 101 |
| A33_0336 | 215  | 256  | 242 |
| A33_0337 | 918  | 954  | 741 |



|          |        |        |        |
|----------|--------|--------|--------|
| A33_0338 | 62     | 49     | 38     |
| A33_0339 | 28     | 27     | 15     |
| A33_0340 | 46     | 56     | 39     |
| A33_0341 | 32     | 51     | 37     |
| A33_0343 | 69986  | 87384  | 124012 |
| A33_0344 | 0      | 0      | 0      |
| A33_0345 | 22     | 22     | 14     |
| A33_0346 | 80     | 47     | 27     |
| A33_0347 | 116    | 117    | 77     |
| A33_0348 | 42     | 55     | 42     |
| A33_0349 | 6      | 6      | 5      |
| A33_0350 | 19396  | 20824  | 22892  |
| A33_0351 | 0      | 0      | 0      |
| A33_0352 | 11     | 33     | 14     |
| A33_0353 | 999    | 1033   | 2053   |
| A33_0354 | 1615   | 1149   | 985    |
| A33_0355 | 1697   | 2125   | 3058   |
| A33_0356 | 621    | 741    | 702    |
| A33_0357 | 231    | 134    | 197    |
| A33_0358 | 162    | 123    | 196    |
| A33_0359 | 108    | 67     | 91     |
| A33_0360 | 247    | 127    | 152    |
| A33_0361 | 15     | 10     | 8      |
| A33_0362 | 119    | 79     | 54     |
| A33_0363 | 45     | 49     | 73     |
| A33_0364 | 7      | 4      | 6      |
| A33_0365 | 81     | 59     | 25     |
| A33_0366 | 2      | 3      | 2      |
| A33_0367 | 150    | 144    | 132    |
| A33_0368 | 1198   | 1367   | 820    |
| A33_0369 | 13     | 13     | 13     |
| A33_0370 | 53     | 33     | 30     |
| A33_0371 | 26     | 22     | 13     |
| A33_0372 | 3      | 3      | 0      |
| A33_0373 | 81     | 85     | 49     |
| A33_0374 | 7      | 12     | 13     |
| A33_0375 | 6      | 7      | 14     |
| A33_0376 | 16     | 26     | 31     |
| A33_0377 | 0      | 0      | 0      |
| A33_0379 | 21     | 12     | 22     |
| A33_0380 | 0      | 0      | 0      |
| A33_0381 | 2228   | 2508   | 420    |
| A33_0382 | 0      | 0      | 0      |
| A33_0383 | 0      | 0      | 0      |
| A33_0385 | 0      | 0      | 0      |
| A33_0386 | 0      | 0      | 0      |
| A33_0387 | 0      | 0      | 0      |
| A33_0388 | 576936 | 721918 | 822281 |

|          |      |      |     |
|----------|------|------|-----|
| A33_0389 | 0    | 0    | 0   |
| A33_0390 | 21   | 14   | 10  |
| A33_0391 | 66   | 68   | 93  |
| A33_0392 | 8    | 11   | 5   |
| A33_0393 | 113  | 135  | 46  |
| A33_0394 | 18   | 20   | 17  |
| A33_0395 | 36   | 38   | 43  |
| A33_0396 | 121  | 160  | 80  |
| A33_0397 | 14   | 12   | 13  |
| A33_0398 | 139  | 156  | 84  |
| A33_0399 | 70   | 69   | 59  |
| A33_0400 | 72   | 57   | 45  |
| A33_0401 | 50   | 43   | 63  |
| A33_0402 | 84   | 69   | 121 |
| A33_0403 | 69   | 53   | 72  |
| A33_0404 | 133  | 123  | 139 |
| A33_0405 | 59   | 59   | 54  |
| A33_0406 | 47   | 37   | 59  |
| A33_0407 | 50   | 43   | 42  |
| A33_0408 | 426  | 377  | 337 |
| A33_0409 | 90   | 99   | 82  |
| A33_0410 | 225  | 200  | 199 |
| A33_0411 | 94   | 94   | 117 |
| A33_0412 | 34   | 44   | 50  |
| A33_0413 | 111  | 78   | 80  |
| A33_0414 | 61   | 46   | 65  |
| A33_0415 | 64   | 48   | 71  |
| A33_0416 | 181  | 171  | 143 |
| A33_0417 | 43   | 42   | 49  |
| A33_0418 | 61   | 60   | 59  |
| A33_0419 | 66   | 87   | 135 |
| A33_0422 | 29   | 29   | 42  |
| A33_0423 | 162  | 180  | 157 |
| A33_0424 | 41   | 35   | 53  |
| A33_0425 | 214  | 159  | 199 |
| A33_0426 | 26   | 22   | 14  |
| A33_0427 | 44   | 37   | 24  |
| A33_0428 | 25   | 25   | 29  |
| A33_0429 | 59   | 51   | 53  |
| A33_0430 | 8    | 7    | 6   |
| A33_0431 | 80   | 57   | 38  |
| A33_0432 | 377  | 368  | 279 |
| A33_0433 | 1014 | 1011 | 259 |
| A33_0434 | 2    | 0    | 0   |
| A33_0435 | 19   | 17   | 16  |
| A33_0436 | 50   | 49   | 36  |
| A33_0437 | 256  | 177  | 189 |
| A33_0438 | 27   | 23   | 25  |

|          |     |     |     |
|----------|-----|-----|-----|
| A33_0439 | 18  | 14  | 11  |
| A33_0440 | 9   | 10  | 10  |
| A33_0441 | 43  | 38  | 31  |
| A33_0442 | 82  | 80  | 88  |
| A33_0443 | 61  | 48  | 45  |
| A33_0444 | 59  | 56  | 63  |
| A33_0445 | 60  | 65  | 80  |
| A33_0446 | 90  | 86  | 74  |
| A33_0447 | 71  | 62  | 55  |
| A33_0448 | 24  | 28  | 20  |
| A33_0449 | 12  | 13  | 12  |
| A33_0450 | 91  | 107 | 52  |
| A33_0451 | 78  | 132 | 87  |
| A33_0452 | 1   | 0   | 0   |
| A33_0453 | 48  | 38  | 33  |
| A33_0454 | 20  | 23  | 18  |
| A33_0455 | 15  | 12  | 11  |
| A33_0456 | 27  | 29  | 30  |
| A33_0457 | 82  | 65  | 22  |
| A33_0458 | 151 | 177 | 231 |
| A33_0459 | 39  | 32  | 32  |
| A33_0460 | 39  | 47  | 30  |
| A33_0461 | 97  | 88  | 59  |
| A33_0462 | 24  | 21  | 21  |
| A33_0463 | 60  | 36  | 49  |
| A33_0464 | 30  | 34  | 28  |
| A33_0465 | 31  | 24  | 10  |
| A33_0466 | 15  | 15  | 18  |
| A33_0467 | 97  | 68  | 62  |
| A33_0468 | 99  | 69  | 70  |
| A33_0469 | 37  | 24  | 14  |
| A33_0470 | 10  | 28  | 14  |
| A33_0471 | 2   | 2   | 2   |
| A33_0472 | 115 | 115 | 99  |
| A33_0473 | 0   | 0   | 1   |
| A33_0474 | 52  | 36  | 23  |
| A33_0475 | 11  | 10  | 9   |
| A33_0476 | 10  | 15  | 11  |
| A33_0477 | 85  | 77  | 60  |
| A33_0478 | 135 | 99  | 45  |
| A33_0479 | 496 | 358 | 163 |
| A33_0480 | 86  | 84  | 59  |
| A33_0481 | 16  | 9   | 14  |
| A33_0482 | 8   | 9   | 14  |
| A33_0483 | 592 | 620 | 290 |
| A33_0484 | 14  | 6   | 2   |
| A33_0485 | 78  | 75  | 46  |
| A33_0486 | 272 | 330 | 72  |

|          |       |       |       |
|----------|-------|-------|-------|
| A33_0487 | 153   | 239   | 48    |
| A33_0488 | 65    | 67    | 28    |
| A33_0489 | 3     | 3     | 3     |
| A33_0490 | 137   | 133   | 446   |
| A33_0491 | 147   | 107   | 106   |
| A33_0492 | 42    | 36    | 31    |
| A33_0493 | 301   | 255   | 366   |
| A33_0494 | 530   | 460   | 645   |
| A33_0495 | 195   | 102   | 166   |
| A33_0496 | 84    | 101   | 80    |
| A33_0497 | 66    | 94    | 73    |
| A33_0498 | 68    | 107   | 89    |
| A33_0499 | 64    | 64    | 40    |
| A33_0500 | 48    | 64    | 49    |
| A33_0501 | 8     | 14    | 8     |
| A33_0502 | 40    | 47    | 47    |
| A33_0503 | 20    | 20    | 16    |
| A33_0504 | 24    | 19    | 21    |
| A33_0505 | 57    | 50    | 52    |
| A33_0506 | 49    | 40    | 55    |
| A33_0507 | 73    | 71    | 101   |
| A33_0508 | 1425  | 1076  | 1856  |
| A33_0509 | 522   | 321   | 352   |
| A33_0510 | 6     | 5     | 8     |
| A33_0511 | 11    | 16    | 12    |
| A33_0512 | 24    | 29    | 35    |
| A33_0513 | 8     | 12    | 12    |
| A33_0514 | 3     | 8     | 8     |
| A33_0515 | 16    | 17    | 28    |
| A33_0516 | 39    | 36    | 22    |
| A33_0517 | 173   | 149   | 252   |
| A33_0518 | 7     | 7     | 11    |
| A33_0519 | 94    | 72    | 104   |
| A33_0520 | 53    | 26    | 102   |
| A33_0521 | 28    | 35    | 30    |
| A33_0522 | 12068 | 13636 | 17409 |
| A33_0523 | 0     | 0     | 0     |
| A33_0524 | 0     | 0     | 0     |
| A33_0525 | 0     | 0     | 0     |
| A33_0526 | 0     | 0     | 0     |
| A33_0527 | 0     | 0     | 1     |
| A33_0528 | 33    | 33    | 29    |
| A33_0529 | 23    | 29    | 24    |
| A33_0530 | 27    | 26    | 27    |
| A33_0531 | 53    | 36    | 28    |
| A33_0532 | 44    | 36    | 50    |
| A33_0533 | 45    | 35    | 56    |
| A33_0534 | 96    | 70    | 64    |

|          |      |      |     |
|----------|------|------|-----|
| A33_0535 | 306  | 230  | 196 |
| A33_0536 | 99   | 90   | 57  |
| A33_0537 | 51   | 54   | 28  |
| A33_0538 | 124  | 112  | 67  |
| A33_0539 | 1    | 0    | 0   |
| A33_0540 | 52   | 28   | 49  |
| A33_0541 | 134  | 121  | 124 |
| A33_0542 | 459  | 330  | 587 |
| A33_0543 | 96   | 66   | 81  |
| A33_0544 | 54   | 50   | 39  |
| A33_0545 | 289  | 231  | 228 |
| A33_0546 | 441  | 432  | 256 |
| A33_0547 | 70   | 78   | 44  |
| A33_0548 | 86   | 114  | 141 |
| A33_0549 | 341  | 269  | 389 |
| A33_0550 | 722  | 710  | 492 |
| A33_0551 | 480  | 417  | 319 |
| A33_0552 | 556  | 482  | 466 |
| A33_0553 | 249  | 207  | 405 |
| A33_0554 | 222  | 251  | 309 |
| A33_0555 | 84   | 104  | 81  |
| A33_0556 | 53   | 48   | 44  |
| A33_0557 | 156  | 149  | 130 |
| A33_0558 | 108  | 94   | 95  |
| A33_0559 | 49   | 56   | 42  |
| A33_0560 | 0    | 0    | 0   |
| A33_0561 | 1724 | 1142 | 488 |
| A33_0562 | 89   | 66   | 48  |
| A33_0563 | 81   | 74   | 59  |
| A33_0564 | 31   | 36   | 27  |
| A33_0565 | 26   | 23   | 12  |
| A33_0566 | 15   | 10   | 13  |
| A33_0567 | 55   | 42   | 36  |
| A33_0568 | 29   | 37   | 28  |
| A33_0569 | 11   | 10   | 13  |
| A33_0570 | 73   | 85   | 55  |
| A33_0571 | 11   | 11   | 7   |
| A33_0572 | 298  | 121  | 129 |
| A33_0573 | 35   | 21   | 29  |
| A33_0574 | 5    | 8    | 6   |
| A33_0575 | 21   | 20   | 19  |
| A33_0576 | 38   | 34   | 42  |
| A33_0577 | 29   | 27   | 24  |
| A33_0578 | 334  | 300  | 179 |
| A33_0579 | 29   | 35   | 22  |
| A33_0580 | 4    | 2    | 5   |
| A33_0581 | 3    | 5    | 4   |
| A33_0582 | 174  | 222  | 249 |

|          |       |       |       |
|----------|-------|-------|-------|
| A33_0583 | 15    | 18    | 25    |
| A33_0584 | 30    | 30    | 51    |
| A33_0585 | 14    | 11    | 10    |
| A33_0586 | 4     | 3     | 3     |
| A33_0587 | 5     | 4     | 10    |
| A33_0588 | 2     | 1     | 2     |
| A33_0589 | 6     | 5     | 12    |
| A33_0590 | 3     | 2     | 3     |
| A33_0591 | 2     | 2     | 3     |
| A33_0592 | 1     | 3     | 1     |
| A33_0593 | 5     | 4     | 4     |
| A33_0594 | 20    | 15    | 10    |
| A33_0595 | 21    | 18    | 23    |
| A33_0596 | 12    | 14    | 9     |
| A33_0597 | 15    | 11    | 9     |
| A33_0598 | 39    | 31    | 53    |
| A33_0599 | 4     | 1     | 7     |
| A33_0600 | 546   | 459   | 454   |
| A33_0601 | 87    | 94    | 98    |
| A33_0602 | 66    | 65    | 63    |
| A33_0603 | 44    | 31    | 50    |
| A33_0604 | 58    | 56    | 33    |
| A33_0605 | 25    | 25    | 16    |
| A33_0606 | 2359  | 1507  | 1144  |
| A33_0607 | 139   | 142   | 89    |
| A33_0608 | 333   | 227   | 82    |
| A33_0609 | 360   | 324   | 237   |
| A33_0610 | 435   | 461   | 332   |
| A33_0611 | 45    | 46    | 38    |
| A33_0612 | 92    | 96    | 105   |
| A33_0613 | 904   | 792   | 1514  |
| A33_0614 | 2642  | 1430  | 5685  |
| A33_0615 | 11610 | 11443 | 27592 |
| A33_0616 | 36    | 19    | 14    |
| A33_0619 | 67    | 64    | 73    |
| A33_0620 | 28    | 18    | 48    |
| A33_0621 | 26    | 24    | 35    |
| A33_0622 | 135   | 69    | 203   |
| A33_0623 | 52    | 45    | 32    |
| A33_0624 | 104   | 97    | 63    |
| A33_0625 | 178   | 188   | 72    |
| A33_0626 | 125   | 129   | 101   |
| A33_0627 | 17    | 11    | 11    |
| A33_0628 | 6     | 5     | 5     |
| A33_0629 | 92    | 88    | 84    |
| A33_0630 | 187   | 112   | 68    |
| A33_0631 | 124   | 82    | 57    |
| A33_0632 | 72    | 58    | 70    |

|          |      |      |      |
|----------|------|------|------|
| A33_0633 | 138  | 113  | 69   |
| A33_0634 | 37   | 22   | 29   |
| A33_0635 | 127  | 123  | 124  |
| A33_0636 | 50   | 42   | 42   |
| A33_0637 | 18   | 13   | 15   |
| A33_0638 | 7    | 7    | 9    |
| A33_0639 | 65   | 68   | 48   |
| A33_0641 | 23   | 13   | 25   |
| A33_0642 | 119  | 111  | 100  |
| A33_0643 | 1    | 0    | 5    |
| A33_0644 | 156  | 111  | 153  |
| A33_0645 | 77   | 58   | 54   |
| A33_0646 | 25   | 19   | 12   |
| A33_0647 | 27   | 25   | 10   |
| A33_0648 | 13   | 13   | 9    |
| A33_0649 | 546  | 442  | 386  |
| A33_0650 | 120  | 135  | 134  |
| A33_0651 | 104  | 96   | 146  |
| A33_0652 | 18   | 26   | 13   |
| A33_0653 | 78   | 81   | 68   |
| A33_0654 | 6    | 8    | 5    |
| A33_0655 | 27   | 37   | 29   |
| A33_0657 | 15   | 10   | 11   |
| A33_0658 | 230  | 300  | 256  |
| A33_0659 | 47   | 40   | 58   |
| A33_0660 | 36   | 28   | 48   |
| A33_0661 | 14   | 15   | 11   |
| A33_0662 | 60   | 76   | 55   |
| A33_0663 | 29   | 33   | 35   |
| A33_0664 | 57   | 62   | 59   |
| A33_0665 | 43   | 48   | 50   |
| A33_0666 | 58   | 69   | 84   |
| A33_0667 | 53   | 50   | 41   |
| A33_0668 | 33   | 24   | 20   |
| A33_0669 | 45   | 29   | 49   |
| A33_0670 | 12   | 10   | 12   |
| A33_0671 | 42   | 43   | 38   |
| A33_0672 | 89   | 82   | 82   |
| A33_0673 | 291  | 169  | 133  |
| A33_0674 | 106  | 88   | 65   |
| A33_0675 | 60   | 85   | 51   |
| A33_0676 | 196  | 305  | 233  |
| A33_0677 | 9    | 28   | 44   |
| A33_0678 | 9    | 29   | 30   |
| A33_0679 | 17   | 50   | 45   |
| A33_0680 | 32   | 27   | 20   |
| A33_0681 | 6793 | 7318 | 4037 |
| A33_0682 | 79   | 93   | 59   |

|          |     |     |     |
|----------|-----|-----|-----|
| A33_0683 | 10  | 20  | 11  |
| A33_0684 | 156 | 142 | 81  |
| A33_0685 | 95  | 107 | 127 |
| A33_0686 | 85  | 45  | 35  |
| A33_0687 | 0   | 0   | 0   |
| A33_0688 | 0   | 0   | 0   |
| A33_0689 | 0   | 0   | 0   |
| A33_0690 | 0   | 0   | 0   |
| A33_0691 | 0   | 0   | 0   |
| A33_0692 | 0   | 0   | 0   |
| A33_0693 | 0   | 0   | 0   |
| A33_0694 | 281 | 334 | 129 |
| A33_0695 | 229 | 235 | 179 |
| A33_0696 | 21  | 11  | 18  |
| A33_0698 | 6   | 5   | 5   |
| A33_0699 | 12  | 8   | 7   |
| A33_0700 | 58  | 61  | 54  |
| A33_0701 | 21  | 17  | 19  |
| A33_0702 | 25  | 32  | 25  |
| A33_0703 | 72  | 82  | 75  |
| A33_0704 | 40  | 44  | 26  |
| A33_0705 | 25  | 28  | 29  |
| A33_0706 | 18  | 23  | 26  |
| A33_0707 | 19  | 25  | 22  |
| A33_0708 | 48  | 52  | 41  |
| A33_0709 | 73  | 72  | 88  |
| A33_0710 | 8   | 8   | 7   |
| A33_0711 | 520 | 416 | 148 |
| A33_0712 | 23  | 24  | 24  |
| A33_0713 | 121 | 179 | 101 |
| A33_0714 | 71  | 185 | 40  |
| A33_0715 | 141 | 102 | 90  |
| A33_0716 | 15  | 13  | 12  |
| A33_0717 | 36  | 40  | 37  |
| A33_0718 | 47  | 39  | 44  |
| A33_0719 | 46  | 45  | 52  |
| A33_0720 | 67  | 45  | 70  |
| A33_0721 | 24  | 15  | 24  |
| A33_0722 | 29  | 28  | 25  |
| A33_0723 | 75  | 80  | 41  |
| A33_0724 | 157 | 173 | 116 |
| A33_0725 | 370 | 377 | 254 |
| A33_0726 | 409 | 384 | 265 |
| A33_0727 | 130 | 145 | 99  |
| A33_0728 | 80  | 92  | 63  |
| A33_0729 | 154 | 126 | 119 |
| A33_0730 | 146 | 122 | 153 |
| A33_0731 | 101 | 84  | 49  |



|          |     |     |     |
|----------|-----|-----|-----|
| A33_0732 | 31  | 17  | 15  |
| A33_0733 | 23  | 16  | 20  |
| A33_0734 | 66  | 57  | 55  |
| A33_0735 | 61  | 51  | 70  |
| A33_0736 | 102 | 86  | 118 |
| A33_0737 | 471 | 414 | 874 |
| A33_0738 | 100 | 114 | 111 |
| A33_0739 | 30  | 29  | 33  |
| A33_0740 | 22  | 25  | 17  |
| A33_0741 | 28  | 22  | 33  |
| A33_0742 | 39  | 47  | 50  |
| A33_0743 | 59  | 47  | 81  |
| A33_0744 | 50  | 36  | 91  |
| A33_0745 | 9   | 7   | 7   |
| A33_0746 | 1   | 4   | 4   |
| A33_0747 | 8   | 11  | 9   |
| A33_0748 | 5   | 5   | 4   |
| A33_0749 | 1   | 1   | 2   |
| A33_0750 | 9   | 11  | 26  |
| A33_0751 | 1   | 1   | 3   |
| A33_0752 | 54  | 80  | 58  |
| A33_0753 | 40  | 55  | 53  |
| A33_0754 | 18  | 19  | 27  |
| A33_0755 | 39  | 53  | 40  |
| A33_0756 | 16  | 10  | 15  |
| A33_0758 | 5   | 7   | 5   |
| A33_0759 | 281 | 308 | 240 |
| A33_0760 | 194 | 232 | 117 |
| A33_0761 | 25  | 22  | 25  |
| A33_0762 | 24  | 24  | 15  |
| A33_0763 | 95  | 145 | 100 |
| A33_0764 | 6   | 4   | 9   |
| A33_0765 | 3   | 4   | 4   |
| A33_0766 | 3   | 4   | 3   |
| A33_0767 | 2   | 2   | 2   |
| A33_0769 | 3   | 3   | 1   |
| A33_0770 | 1   | 1   | 1   |
| A33_0771 | 1   | 2   | 1   |
| A33_0772 | 7   | 8   | 10  |
| A33_0773 | 2   | 2   | 2   |
| A33_0774 | 3   | 2   | 3   |
| A33_0775 | 2   | 3   | 3   |
| A33_0776 | 12  | 7   | 30  |
| A33_0777 | 6   | 4   | 7   |
| A33_0778 | 18  | 13  | 18  |
| A33_0779 | 9   | 10  | 9   |
| A33_0780 | 34  | 37  | 28  |
| A33_0781 | 19  | 15  | 10  |

|          |        |        |        |
|----------|--------|--------|--------|
| A33_0782 | 8      | 8      | 10     |
| A33_0783 | 85     | 64     | 1287   |
| A33_0785 | 46     | 33     | 46     |
| A33_0786 | 26     | 32     | 28     |
| A33_0787 | 421397 | 427376 | 558649 |
| A33_0788 | 144    | 122    | 186    |
| A33_0789 | 67     | 60     | 31     |
| A33_0790 | 165    | 201    | 81     |
| A33_0791 | 14     | 18     | 28     |
| A33_0792 | 14     | 17     | 115    |
| A33_0793 | 47     | 60     | 39     |
| A33_0794 | 284    | 222    | 120    |
| A33_0796 | 44     | 35     | 45     |
| A33_0797 | 923    | 508    | 339    |
| A33_0798 | 39     | 31     | 34     |
| A33_0799 | 26     | 20     | 13     |
| A33_0800 | 3      | 4      | 3      |
| A33_0801 | 6      | 2      | 5      |
| A33_0802 | 3      | 2      | 5      |
| A33_0803 | 2      | 1      | 5      |
| A33_0804 | 22     | 13     | 15     |
| A33_0805 | 20     | 17     | 17     |
| A33_0806 | 158    | 126    | 154    |
| A33_0807 | 57     | 52     | 45     |
| A33_0808 | 1      | 3      | 0      |
| A33_0809 | 30     | 24     | 40     |
| A33_0810 | 56     | 67     | 72     |
| A33_0811 | 67     | 89     | 83     |
| A33_0812 | 136    | 114    | 87     |
| A33_0813 | 24     | 21     | 23     |
| A33_0814 | 11     | 11     | 11     |
| A33_0815 | 10     | 15     | 48     |
| A33_0816 | 4      | 13     | 32     |
| A33_0817 | 6      | 10     | 14     |
| A33_0818 | 16     | 18     | 25     |
| A33_0819 | 59     | 42     | 33     |
| A33_0820 | 74     | 54     | 134    |
| A33_0821 | 13     | 15     | 10     |
| A33_0822 | 41     | 22     | 31     |
| A33_0823 | 3      | 2      | 2      |
| A33_0824 | 4      | 2      | 6      |
| A33_0825 | 49     | 45     | 58     |
| A33_0826 | 66     | 54     | 73     |
| A33_0827 | 115    | 99     | 63     |
| A33_0828 | 53     | 50     | 52     |
| A33_0829 | 111    | 89     | 137    |
| A33_0830 | 8      | 8      | 8      |
| A33_0831 | 24     | 44     | 37     |

|          |     |     |     |
|----------|-----|-----|-----|
| A33_0832 | 15  | 17  | 26  |
| A33_0833 | 24  | 26  | 13  |
| A33_0834 | 18  | 8   | 12  |
| A33_0835 | 120 | 140 | 116 |
| A33_0836 | 23  | 22  | 21  |
| A33_0837 | 25  | 34  | 21  |
| A33_0838 | 10  | 8   | 13  |
| A33_0839 | 12  | 13  | 15  |
| A33_0840 | 63  | 70  | 104 |
| A33_0841 | 20  | 14  | 44  |
| A33_0842 | 23  | 19  | 22  |
| A33_0843 | 58  | 58  | 60  |
| A33_0844 | 24  | 31  | 34  |
| A33_0845 | 29  | 17  | 14  |
| A33_0846 | 9   | 5   | 5   |
| A33_0847 | 0   | 0   | 0   |
| A33_0848 | 0   | 0   | 0   |
| A33_0849 | 0   | 0   | 0   |
| A33_0850 | 0   | 0   | 0   |
| A33_0851 | 0   | 0   | 0   |
| A33_0852 | 0   | 0   | 0   |
| A33_0853 | 17  | 22  | 19  |
| A33_0854 | 26  | 31  | 30  |
| A33_0855 | 110 | 276 | 79  |
| A33_0856 | 15  | 38  | 13  |
| A33_0857 | 24  | 36  | 25  |
| A33_0858 | 23  | 30  | 28  |
| A33_0859 | 27  | 42  | 20  |
| A33_0860 | 10  | 12  | 10  |
| A33_0861 | 10  | 18  | 15  |
| A33_0862 | 24  | 28  | 35  |
| A33_0863 | 26  | 34  | 45  |
| A33_0864 | 12  | 17  | 16  |
| A33_0865 | 2   | 2   | 3   |
| A33_0866 | 12  | 12  | 22  |
| A33_0867 | 52  | 68  | 30  |
| A33_0868 | 11  | 11  | 14  |
| A33_0869 | 25  | 34  | 13  |
| A33_0870 | 81  | 163 | 81  |
| A33_0871 | 3   | 5   | 3   |
| A33_0872 | 64  | 275 | 33  |
| A33_0873 | 21  | 61  | 12  |
| A33_0874 | 39  | 94  | 27  |
| A33_0875 | 25  | 39  | 17  |
| A33_0876 | 0   | 0   | 0   |
| A33_0877 | 33  | 46  | 26  |
| A33_0878 | 41  | 72  | 41  |
| A33_0879 | 53  | 56  | 35  |

|          |      |      |      |
|----------|------|------|------|
| A33_0880 | 5    | 3    | 6    |
| A33_0881 | 199  | 168  | 122  |
| A33_0882 | 296  | 261  | 281  |
| A33_0883 | 17   | 14   | 15   |
| A33_0884 | 45   | 47   | 35   |
| A33_0885 | 13   | 10   | 13   |
| A33_0886 | 109  | 100  | 83   |
| A33_0887 | 75   | 73   | 80   |
| A33_0888 | 24   | 26   | 36   |
| A33_0889 | 15   | 15   | 18   |
| A33_0890 | 13   | 18   | 17   |
| A33_0891 | 58   | 44   | 43   |
| A33_0892 | 58   | 81   | 74   |
| A33_0893 | 173  | 181  | 243  |
| A33_0894 | 93   | 87   | 76   |
| A33_0895 | 374  | 256  | 250  |
| A33_0896 | 32   | 29   | 55   |
| A33_0897 | 352  | 367  | 315  |
| A33_0898 | 299  | 296  | 281  |
| A33_0899 | 113  | 119  | 128  |
| A33_0900 | 12   | 10   | 16   |
| A33_0901 | 27   | 24   | 18   |
| A33_0904 | 41   | 37   | 29   |
| A33_0905 | 2011 | 1305 | 1624 |
| A33_0908 | 312  | 286  | 189  |
| A33_0909 | 19   | 21   | 20   |
| A33_0910 | 201  | 192  | 177  |
| A33_0911 | 11   | 12   | 12   |
| A33_0912 | 28   | 25   | 30   |
| A33_0913 | 23   | 22   | 21   |
| A33_0914 | 28   | 26   | 15   |
| A33_0915 | 11   | 21   | 20   |
| A33_0916 | 24   | 26   | 21   |
| A33_0917 | 30   | 26   | 22   |
| A33_0918 | 54   | 41   | 58   |
| A33_0919 | 132  | 130  | 197  |
| A33_0920 | 30   | 32   | 42   |
| A33_0921 | 28   | 33   | 32   |
| A33_0922 | 43   | 27   | 15   |
| A33_0923 | 215  | 223  | 144  |
| A33_0924 | 57   | 59   | 46   |
| A33_0925 | 9    | 9    | 7    |
| A33_0926 | 15   | 1    | 7    |
| A33_0927 | 66   | 59   | 43   |
| A33_0928 | 27   | 29   | 33   |
| A33_0929 | 27   | 22   | 25   |
| A33_0930 | 299  | 186  | 187  |
| A33_0931 | 218  | 151  | 250  |

|          |     |     |      |
|----------|-----|-----|------|
| A33_0932 | 79  | 56  | 58   |
| A33_0933 | 85  | 73  | 56   |
| A33_0934 | 8   | 9   | 5    |
| A33_0935 | 117 | 119 | 134  |
| A33_0936 | 18  | 18  | 19   |
| A33_0937 | 150 | 131 | 120  |
| A33_0938 | 56  | 54  | 45   |
| A33_0939 | 66  | 65  | 77   |
| A33_0940 | 90  | 81  | 86   |
| A33_0941 | 65  | 50  | 57   |
| A33_0942 | 10  | 12  | 9    |
| A33_0943 | 33  | 46  | 71   |
| A33_0944 | 91  | 109 | 105  |
| A33_0945 | 21  | 22  | 40   |
| A33_0946 | 15  | 11  | 24   |
| A33_0947 | 29  | 30  | 43   |
| A33_0948 | 25  | 18  | 45   |
| A33_0949 | 32  | 28  | 49   |
| A33_0950 | 71  | 68  | 64   |
| A33_0951 | 61  | 65  | 68   |
| A33_0952 | 987 | 682 | 1603 |
| A33_0953 | 0   | 0   | 0    |
| A33_0954 | 55  | 64  | 63   |
| A33_0955 | 50  | 43  | 56   |
| A33_0956 | 39  | 44  | 51   |
| A33_0957 | 148 | 154 | 233  |
| A33_0958 | 11  | 14  | 11   |
| A33_0959 | 44  | 52  | 59   |
| A33_0960 | 49  | 43  | 63   |
| A33_0961 | 40  | 53  | 54   |
| A33_0962 | 80  | 99  | 97   |
| A33_0963 | 45  | 69  | 38   |
| A33_0964 | 189 | 168 | 71   |
| A33_0965 | 407 | 357 | 122  |
| A33_0966 | 553 | 365 | 384  |
| A33_0967 | 3   | 2   | 1    |
| A33_0968 | 4   | 2   | 1    |
| A33_0969 | 90  | 67  | 71   |
| A33_0970 | 109 | 119 | 89   |
| A33_0971 | 23  | 27  | 24   |
| A33_0972 | 60  | 49  | 37   |
| A33_0973 | 30  | 39  | 14   |
| A33_0974 | 22  | 31  | 23   |
| A33_0975 | 9   | 11  | 11   |
| A33_0976 | 611 | 278 | 173  |
| A33_0977 | 55  | 81  | 68   |
| A33_0978 | 47  | 63  | 53   |
| A33_0979 | 98  | 87  | 32   |

|          |     |     |     |
|----------|-----|-----|-----|
| A33_0980 | 102 | 72  | 65  |
| A33_0981 | 217 | 232 | 173 |
| A33_0982 | 122 | 149 | 156 |
| A33_0983 | 108 | 63  | 52  |
| A33_0984 | 159 | 90  | 98  |
| A33_0985 | 31  | 28  | 22  |
| A33_0986 | 40  | 40  | 33  |
| A33_0987 | 65  | 58  | 61  |
| A33_0989 | 40  | 25  | 47  |
| A33_0990 | 2   | 6   | 3   |
| A33_0991 | 21  | 48  | 26  |
| A33_0992 | 16  | 13  | 11  |
| A33_0993 | 52  | 35  | 24  |
| A33_0994 | 72  | 84  | 67  |
| A33_0995 | 24  | 16  | 18  |
| A33_0996 | 14  | 17  | 18  |
| A33_0997 | 49  | 45  | 46  |
| A33_0998 | 482 | 340 | 528 |
| A33_0999 | 11  | 14  | 14  |
| A33_1000 | 95  | 101 | 96  |
| A33_1001 | 58  | 65  | 44  |
| A33_1002 | 27  | 15  | 18  |
| A33_1003 | 23  | 20  | 23  |
| A33_1004 | 28  | 42  | 43  |
| A33_1005 | 43  | 51  | 45  |
| A33_1006 | 9   | 8   | 9   |
| A33_1007 | 3   | 4   | 4   |
| A33_1008 | 37  | 28  | 23  |
| A33_1009 | 30  | 37  | 33  |
| A33_1010 | 23  | 14  | 12  |
| A33_1011 | 10  | 2   | 10  |
| A33_1012 | 10  | 5   | 10  |
| A33_1013 | 119 | 46  | 129 |
| A33_1014 | 141 | 48  | 113 |
| A33_1015 | 109 | 51  | 74  |
| A33_1016 | 99  | 29  | 86  |
| A33_1017 | 82  | 32  | 92  |
| A33_1018 | 87  | 33  | 68  |
| A33_1019 | 72  | 31  | 62  |
| A33_1020 | 147 | 75  | 96  |
| A33_1021 | 16  | 9   | 13  |
| A33_1022 | 21  | 8   | 20  |
| A33_1023 | 568 | 575 | 369 |
| A33_1024 | 18  | 15  | 12  |
| A33_1025 | 63  | 66  | 69  |
| A33_1026 | 76  | 77  | 57  |
| A33_1027 | 59  | 60  | 58  |
| A33_1028 | 25  | 31  | 20  |

|          |       |       |      |
|----------|-------|-------|------|
| A33_1029 | 33    | 25    | 31   |
| A33_1030 | 24    | 14    | 21   |
| A33_1031 | 679   | 641   | 727  |
| A33_1032 | 17    | 15    | 12   |
| A33_1033 | 227   | 295   | 203  |
| A33_1034 | 63    | 75    | 47   |
| A33_1035 | 81    | 119   | 67   |
| A33_1036 | 25    | 30    | 23   |
| A33_1037 | 5     | 7     | 6    |
| A33_1038 | 41    | 26    | 17   |
| A33_1039 | 100   | 75    | 78   |
| A33_1040 | 77    | 62    | 73   |
| A33_1041 | 162   | 170   | 91   |
| A33_1042 | 111   | 162   | 54   |
| A33_1043 | 126   | 135   | 63   |
| A33_1044 | 79    | 98    | 38   |
| A33_1045 | 45    | 47    | 27   |
| A33_1046 | 46    | 50    | 29   |
| A33_1047 | 26584 | 26869 | 6725 |
| A33_1048 | 0     | 0     | 0    |
| A33_1050 | 55    | 52    | 75   |
| A33_1051 | 35    | 35    | 45   |
| A33_1052 | 80    | 65    | 70   |
| A33_1053 | 62    | 70    | 86   |
| A33_1054 | 48    | 31    | 39   |
| A33_1055 | 38    | 17    | 32   |
| A33_1056 | 81    | 55    | 58   |
| A33_1057 | 155   | 89    | 112  |
| A33_1058 | 38    | 32    | 20   |
| A33_1059 | 60    | 76    | 70   |
| A33_1060 | 169   | 168   | 130  |
| A33_1061 | 8     | 5     | 6    |
| A33_1062 | 726   | 565   | 683  |
| A33_1063 | 15    | 9     | 15   |
| A33_1064 | 120   | 105   | 39   |
| A33_1065 | 22    | 21    | 24   |
| A33_1066 | 11    | 15    | 10   |
| A33_1067 | 14    | 19    | 15   |
| A33_1068 | 19    | 20    | 14   |
| A33_1069 | 32    | 28    | 21   |
| A33_1070 | 19    | 22    | 17   |
| A33_1071 | 19    | 22    | 16   |
| A33_1072 | 22    | 17    | 19   |
| A33_1073 | 11    | 9     | 11   |
| A33_1074 | 175   | 144   | 136  |
| A33_1075 | 1448  | 2174  | 448  |
| A33_1076 | 262   | 270   | 233  |
| A33_1077 | 225   | 162   | 190  |

|          |     |     |     |
|----------|-----|-----|-----|
| A33_1078 | 30  | 29  | 34  |
| A33_1079 | 276 | 203 | 116 |
| A33_1080 | 63  | 42  | 49  |
| A33_1081 | 187 | 119 | 77  |
| A33_1082 | 17  | 14  | 9   |
| A33_1083 | 66  | 55  | 87  |
| A33_1084 | 24  | 19  | 18  |
| A33_1085 | 289 | 255 | 271 |
| A33_1086 | 194 | 112 | 250 |
| A33_1087 | 113 | 89  | 89  |
| A33_1088 | 44  | 38  | 38  |
| A33_1089 | 47  | 42  | 26  |
| A33_1090 | 78  | 55  | 37  |
| A33_1091 | 45  | 36  | 19  |
| A33_1092 | 41  | 36  | 68  |
| A33_1093 | 39  | 36  | 44  |
| A33_1094 | 25  | 20  | 11  |
| A33_1095 | 8   | 8   | 7   |
| A33_1096 | 8   | 6   | 6   |
| A33_1097 | 9   | 9   | 7   |
| A33_1098 | 58  | 53  | 44  |
| A33_1099 | 17  | 20  | 15  |
| A33_1102 | 23  | 26  | 19  |
| A33_1103 | 24  | 22  | 15  |
| A33_1104 | 27  | 33  | 25  |
| A33_1105 | 60  | 63  | 48  |
| A33_1106 | 5   | 9   | 4   |
| A33_1107 | 3   | 3   | 4   |
| A33_1108 | 97  | 94  | 61  |
| A33_1109 | 84  | 79  | 144 |
| A33_1110 | 158 | 113 | 158 |
| A33_1111 | 50  | 53  | 77  |
| A33_1112 | 61  | 64  | 58  |
| A33_1113 | 96  | 100 | 74  |
| A33_1114 | 863 | 572 | 414 |
| A33_1115 | 621 | 541 | 729 |
| A33_1116 | 9   | 9   | 10  |
| A33_1117 | 50  | 59  | 54  |
| A33_1118 | 31  | 28  | 35  |
| A33_1119 | 31  | 23  | 24  |
| A33_1120 | 74  | 61  | 38  |
| A33_1121 | 68  | 59  | 78  |
| A33_1122 | 36  | 29  | 170 |
| A33_1123 | 42  | 34  | 59  |
| A33_1124 | 15  | 16  | 12  |
| A33_1125 | 30  | 29  | 22  |
| A33_1126 | 19  | 14  | 9   |
| A33_1127 | 107 | 64  | 51  |



|          |       |       |       |
|----------|-------|-------|-------|
| A33_1128 | 40    | 50    | 41    |
| A33_1129 | 17    | 25    | 20    |
| A33_1130 | 28    | 42    | 42    |
| A33_1131 | 129   | 191   | 64    |
| A33_1132 | 16    | 13    | 13    |
| A33_1133 | 14    | 13    | 9     |
| A33_1134 | 11    | 10    | 11    |
| A33_1135 | 8     | 7     | 7     |
| A33_1136 | 28    | 27    | 34    |
| A33_1137 | 121   | 78    | 123   |
| A33_1138 | 306   | 270   | 227   |
| A33_1140 | 181   | 163   | 99    |
| A33_1141 | 25    | 31    | 16    |
| A33_1142 | 10    | 8     | 7     |
| A33_1143 | 19    | 17    | 18    |
| A33_1144 | 273   | 279   | 134   |
| A33_1145 | 57    | 65    | 47    |
| A33_1146 | 45    | 40    | 47    |
| A33_1147 | 1206  | 1408  | 1621  |
| A33_1149 | 3     | 0     | 0     |
| A33_1150 | 21769 | 21696 | 39554 |
| A33_1151 | 0     | 0     | 0     |
| A33_1152 | 95    | 101   | 61    |
| A33_1153 | 20    | 7     | 8     |
| A33_1154 | 401   | 388   | 372   |
| A33_1155 | 75    | 36    | 36    |
| A33_1158 | 141   | 120   | 121   |
| A33_1160 | 273   | 283   | 224   |
| A33_1161 | 64    | 135   | 131   |
| A33_1162 | 35    | 42    | 31    |
| A33_1163 | 13    | 13    | 16    |
| A33_1164 | 6     | 7     | 5     |
| A33_1165 | 46    | 32    | 69    |
| A33_1166 | 43    | 47    | 55    |
| A33_1167 | 24    | 24    | 20    |
| A33_1168 | 25    | 19    | 19    |
| A33_1169 | 5     | 5     | 11    |
| A33_1170 | 29    | 25    | 22    |
| A33_1171 | 1     | 0     | 4     |
| A33_1172 | 5     | 4     | 4     |
| A33_1173 | 10    | 5     | 10    |
| A33_1174 | 16    | 17    | 18    |
| A33_1175 | 23    | 25    | 19    |
| A33_1176 | 277   | 269   | 244   |
| A33_1177 | 5     | 6     | 8     |
| A33_1178 | 21    | 17    | 19    |
| A33_1179 | 22    | 22    | 13    |
| A33_1180 | 2207  | 1867  | 1603  |

|          |      |      |      |
|----------|------|------|------|
| A33_1181 | 166  | 52   | 85   |
| A33_1182 | 798  | 401  | 408  |
| A33_1183 | 20   | 18   | 17   |
| A33_1184 | 47   | 33   | 60   |
| A33_1185 | 672  | 936  | 347  |
| A33_1186 | 343  | 305  | 195  |
| A33_1187 | 69   | 146  | 28   |
| A33_1188 | 140  | 127  | 84   |
| A33_1189 | 83   | 83   | 53   |
| A33_1190 | 51   | 53   | 26   |
| A33_1191 | 458  | 330  | 368  |
| A33_1192 | 22   | 25   | 15   |
| A33_1193 | 43   | 33   | 24   |
| A33_1194 | 33   | 42   | 27   |
| A33_1195 | 2102 | 1248 | 1627 |
| A33_1196 | 96   | 86   | 62   |
| A33_1197 | 75   | 99   | 119  |
| A33_1198 | 35   | 42   | 52   |
| A33_1199 | 127  | 135  | 250  |
| A33_1200 | 34   | 48   | 78   |
| A33_1201 | 155  | 188  | 107  |
| A33_1202 | 261  | 243  | 211  |
| A33_1203 | 36   | 33   | 26   |
| A33_1204 | 301  | 305  | 356  |
| A33_1205 | 11   | 5    | 5    |
| A33_1206 | 4    | 4    | 3    |
| A33_1207 | 4    | 4    | 3    |
| A33_1208 | 23   | 27   | 17   |
| A33_1209 | 39   | 39   | 24   |
| A33_1210 | 59   | 58   | 62   |
| A33_1211 | 68   | 73   | 50   |
| A33_1212 | 12   | 13   | 17   |
| A33_1213 | 16   | 15   | 12   |
| A33_1214 | 76   | 45   | 58   |
| A33_1215 | 19   | 18   | 11   |
| A33_1216 | 11   | 6    | 9    |
| A33_1217 | 45   | 58   | 27   |
| A33_1218 | 31   | 33   | 30   |
| A33_1219 | 46   | 52   | 33   |
| A33_1220 | 14   | 16   | 19   |
| A33_1221 | 35   | 45   | 32   |
| A33_1222 | 33   | 34   | 25   |
| A33_1223 | 18   | 15   | 16   |
| A33_1224 | 34   | 35   | 19   |
| A33_1225 | 75   | 81   | 56   |
| A33_1227 | 2    | 3    | 2    |
| A33_1228 | 13   | 19   | 18   |
| A33_1229 | 184  | 129  | 121  |

|          |     |     |     |
|----------|-----|-----|-----|
| A33_1230 | 208 | 66  | 128 |
| A33_1232 | 6   | 10  | 9   |
| A33_1233 | 34  | 23  | 29  |
| A33_1234 | 75  | 33  | 49  |
| A33_1235 | 94  | 54  | 40  |
| A33_1236 | 15  | 20  | 11  |
| A33_1237 | 234 | 225 | 183 |
| A33_1238 | 98  | 59  | 44  |
| A33_1239 | 27  | 19  | 22  |
| A33_1240 | 65  | 63  | 62  |
| A33_1241 | 39  | 38  | 30  |
| A33_1242 | 70  | 48  | 76  |
| A33_1243 | 57  | 43  | 43  |
| A33_1244 | 10  | 14  | 12  |
| A33_1245 | 13  | 9   | 15  |
| A33_1246 | 20  | 12  | 20  |
| A33_1247 | 44  | 30  | 38  |
| A33_1248 | 33  | 23  | 28  |
| A33_1249 | 83  | 50  | 57  |
| A33_1250 | 0   | 0   | 0   |
| A33_1251 | 7   | 8   | 6   |
| A33_1252 | 7   | 4   | 8   |
| A33_1253 | 33  | 39  | 49  |
| A33_1254 | 95  | 79  | 90  |
| A33_1255 | 65  | 53  | 44  |
| A33_1256 | 119 | 89  | 99  |
| A33_1257 | 58  | 27  | 14  |
| A33_1258 | 9   | 1   | 5   |
| A33_1259 | 9   | 6   | 6   |
| A33_1260 | 8   | 5   | 6   |
| A33_1261 | 12  | 15  | 12  |
| A33_1262 | 38  | 31  | 20  |
| A33_1263 | 54  | 58  | 52  |
| A33_1264 | 46  | 39  | 39  |
| A33_1265 | 5   | 3   | 3   |
| A33_1266 | 3   | 4   | 3   |
| A33_1267 | 5   | 3   | 10  |
| A33_1268 | 7   | 3   | 10  |
| A33_1269 | 30  | 34  | 80  |
| A33_1270 | 6   | 6   | 2   |
| A33_1271 | 3   | 7   | 2   |
| A33_1272 | 8   | 8   | 4   |
| A33_1273 | 4   | 5   | 3   |
| A33_1274 | 4   | 6   | 4   |
| A33_1275 | 13  | 17  | 14  |
| A33_1276 | 140 | 147 | 111 |
| A33_1277 | 81  | 72  | 74  |
| A33_1278 | 11  | 9   | 9   |

|          |      |      |      |
|----------|------|------|------|
| A33_1279 | 1994 | 1406 | 725  |
| A33_1280 | 1289 | 925  | 1375 |
| A33_1281 | 1059 | 861  | 1623 |
| A33_1282 | 41   | 23   | 26   |
| A33_1283 | 872  | 659  | 1186 |
| A33_1284 | 90   | 62   | 57   |
| A33_1285 | 282  | 322  | 102  |
| A33_1286 | 19   | 16   | 28   |
| A33_1287 | 14   | 12   | 11   |
| A33_1288 | 36   | 25   | 27   |
| A33_1289 | 110  | 134  | 75   |
| A33_1290 | 1374 | 1058 | 633  |
| A33_1291 | 29   | 9    | 19   |
| A33_1292 | 25   | 18   | 24   |
| A33_1293 | 33   | 15   | 19   |
| A33_1294 | 31   | 18   | 15   |
| A33_1295 | 123  | 63   | 22   |
| A33_1296 | 127  | 139  | 93   |
| A33_1297 | 68   | 54   | 49   |
| A33_1298 | 12   | 15   | 11   |
| A33_1299 | 22   | 22   | 17   |
| A33_1300 | 21   | 14   | 15   |
| A33_1301 | 1351 | 1110 | 1997 |
| A33_1302 | 76   | 29   | 26   |
| A33_1303 | 82   | 37   | 57   |
| A33_1304 | 8    | 5    | 7    |
| A33_1305 | 35   | 20   | 22   |
| A33_1306 | 5    | 7    | 8    |
| A33_1307 | 8    | 6    | 9    |
| A33_1308 | 6    | 6    | 7    |
| A33_1309 | 34   | 34   | 24   |
| A33_1310 | 16   | 12   | 22   |
| A33_1311 | 338  | 243  | 589  |
| A33_1312 | 28   | 34   | 31   |
| A33_1313 | 197  | 288  | 161  |
| A33_1314 | 0    | 0    | 0    |
| A33_1315 | 30   | 24   | 37   |
| A33_1316 | 181  | 87   | 142  |
| A33_1317 | 10   | 7    | 9    |
| A33_1318 | 2    | 0    | 0    |
| A33_1319 | 2    | 2    | 4    |
| A33_1320 | 11   | 12   | 12   |
| A33_1321 | 27   | 28   | 17   |
| A33_1322 | 26   | 33   | 20   |
| A33_1323 | 41   | 21   | 26   |
| A33_1324 | 56   | 29   | 29   |
| A33_1325 | 87   | 32   | 56   |
| A33_1326 | 25   | 13   | 23   |

|          |     |     |     |
|----------|-----|-----|-----|
| A33_1327 | 35  | 8   | 25  |
| A33_1328 | 32  | 14  | 20  |
| A33_1329 | 43  | 15  | 30  |
| A33_1330 | 25  | 11  | 21  |
| A33_1331 | 37  | 16  | 28  |
| A33_1332 | 40  | 26  | 14  |
| A33_1333 | 88  | 53  | 41  |
| A33_1334 | 143 | 84  | 76  |
| A33_1335 | 19  | 14  | 18  |
| A33_1336 | 27  | 21  | 15  |
| A33_1337 | 8   | 7   | 8   |
| A33_1338 | 9   | 12  | 10  |
| A33_1339 | 19  | 20  | 17  |
| A33_1340 | 15  | 10  | 13  |
| A33_1341 | 73  | 58  | 25  |
| A33_1342 | 1   | 0   | 1   |
| A33_1343 | 124 | 24  | 45  |
| A33_1344 | 17  | 5   | 25  |
| A33_1345 | 17  | 6   | 32  |
| A33_1346 | 29  | 18  | 44  |
| A33_1347 | 67  | 40  | 113 |
| A33_1348 | 34  | 20  | 31  |
| A33_1349 | 11  | 9   | 8   |
| A33_1350 | 108 | 106 | 88  |
| A33_1351 | 201 | 216 | 205 |
| A33_1352 | 95  | 94  | 41  |
| A33_1353 | 147 | 109 | 38  |
| A33_1354 | 88  | 81  | 74  |
| A33_1355 | 50  | 35  | 54  |
| A33_1356 | 32  | 31  | 14  |
| A33_1357 | 36  | 34  | 14  |
| A33_1358 | 66  | 71  | 50  |
| A33_1359 | 41  | 37  | 40  |
| A33_1360 | 12  | 11  | 14  |
| A33_1361 | 263 | 205 | 184 |
| A33_1362 | 617 | 435 | 218 |
| A33_1363 | 51  | 40  | 54  |
| A33_1364 | 98  | 95  | 229 |
| A33_1365 | 33  | 28  | 34  |
| A33_1366 | 59  | 46  | 41  |
| A33_1367 | 289 | 229 | 234 |
| A33_1368 | 87  | 95  | 123 |
| A33_1369 | 336 | 258 | 297 |
| A33_1370 | 288 | 211 | 194 |
| A33_1371 | 58  | 47  | 22  |
| A33_1372 | 69  | 65  | 67  |
| A33_1373 | 37  | 43  | 56  |
| A33_1374 | 6   | 4   | 6   |

|          |     |      |     |
|----------|-----|------|-----|
| A33_1375 | 1   | 0    | 2   |
| A33_1376 | 1   | 1    | 1   |
| A33_1377 | 7   | 13   | 6   |
| A33_1378 | 0   | 1    | 1   |
| A33_1379 | 23  | 29   | 21  |
| A33_1380 | 695 | 1074 | 342 |
| A33_1381 | 0   | 2    | 2   |
| A33_1382 | 0   | 1    | 0   |
| A33_1383 | 1   | 0    | 1   |
| A33_1384 | 2   | 0    | 3   |
| A33_1385 | 24  | 13   | 19  |
| A33_1387 | 0   | 1    | 3   |
| A33_1388 | 0   | 1    | 1   |
| A33_1389 | 0   | 0    | 1   |
| A33_1390 | 5   | 12   | 7   |
| A33_1391 | 0   | 0    | 0   |
| A33_1392 | 135 | 100  | 60  |
| A33_1393 | 46  | 60   | 46  |
| A33_1394 | 280 | 302  | 177 |
| A33_1395 | 242 | 222  | 137 |
| A33_1396 | 21  | 18   | 10  |
| A33_1397 | 116 | 102  | 92  |
| A33_1398 | 79  | 86   | 91  |
| A33_1399 | 39  | 26   | 30  |
| A33_1400 | 28  | 25   | 24  |
| A33_1401 | 21  | 16   | 15  |
| A33_1402 | 11  | 6    | 2   |
| A33_1403 | 75  | 44   | 225 |
| A33_1404 | 22  | 23   | 15  |
| A33_1405 | 152 | 105  | 131 |
| A33_1406 | 15  | 14   | 9   |
| A33_1407 | 100 | 77   | 77  |
| A33_1408 | 16  | 13   | 8   |
| A33_1409 | 260 | 228  | 199 |
| A33_1412 | 14  | 10   | 9   |
| A33_1413 | 28  | 27   | 37  |
| A33_1415 | 12  | 10   | 10  |
| A33_1416 | 131 | 121  | 85  |
| A33_1417 | 66  | 45   | 29  |
| A33_1418 | 23  | 26   | 19  |
| A33_1419 | 21  | 18   | 15  |
| A33_1420 | 67  | 43   | 61  |
| A33_1421 | 245 | 281  | 177 |
| A33_1422 | 161 | 176  | 71  |
| A33_1423 | 153 | 201  | 92  |
| A33_1424 | 214 | 290  | 217 |
| A33_1425 | 224 | 261  | 146 |
| A33_1426 | 174 | 166  | 100 |

|          |     |     |     |
|----------|-----|-----|-----|
| A33_1427 | 243 | 338 | 162 |
| A33_1428 | 166 | 220 | 65  |
| A33_1429 | 191 | 235 | 126 |
| A33_1430 | 53  | 72  | 29  |
| A33_1431 | 65  | 69  | 29  |
| A33_1432 | 8   | 10  | 8   |
| A33_1433 | 0   | 0   | 0   |
| A33_1434 | 23  | 18  | 20  |
| A33_1435 | 16  | 16  | 11  |
| A33_1436 | 111 | 166 | 70  |
| A33_1437 | 39  | 49  | 50  |
| A33_1438 | 64  | 67  | 58  |
| A33_1439 | 57  | 62  | 56  |
| A33_1440 | 37  | 38  | 48  |
| A33_1441 | 105 | 101 | 92  |
| A33_1442 | 26  | 21  | 18  |
| A33_1443 | 3   | 3   | 3   |
| A33_1444 | 88  | 73  | 54  |
| A33_1445 | 4   | 8   | 5   |
| A33_1446 | 71  | 62  | 37  |
| A33_1447 | 910 | 712 | 681 |
| A33_1448 | 168 | 129 | 74  |
| A33_1449 | 367 | 402 | 172 |
| A33_1450 | 10  | 10  | 11  |
| A33_1451 | 7   | 6   | 1   |
| A33_1452 | 1   | 1   | 1   |
| A33_1453 | 59  | 62  | 90  |
| A33_1454 | 64  | 94  | 195 |
| A33_1455 | 31  | 28  | 107 |
| A33_1456 | 30  | 28  | 65  |
| A33_1457 | 28  | 33  | 62  |
| A33_1458 | 37  | 52  | 41  |
| A33_1459 | 2   | 2   | 2   |
| A33_1460 | 1   | 1   | 1   |
| A33_1461 | 1   | 2   | 0   |
| A33_1462 | 2   | 1   | 1   |
| A33_1463 | 15  | 11  | 10  |
| A33_1464 | 17  | 24  | 9   |
| A33_1465 | 60  | 61  | 57  |
| A33_1466 | 97  | 53  | 59  |
| A33_1467 | 3   | 10  | 1   |
| A33_1468 | 6   | 5   | 8   |
| A33_1469 | 31  | 22  | 30  |
| A33_1470 | 358 | 157 | 76  |
| A33_1471 | 14  | 9   | 8   |
| A33_1472 | 7   | 11  | 5   |
| A33_1473 | 4   | 5   | 5   |
| A33_1474 | 4   | 4   | 5   |

|          |       |       |       |
|----------|-------|-------|-------|
| A33_1475 | 5     | 6     | 5     |
| A33_1476 | 5     | 10    | 7     |
| A33_1477 | 3     | 4     | 4     |
| A33_1478 | 11    | 11    | 14    |
| A33_1479 | 14    | 9     | 13    |
| A33_1480 | 5     | 8     | 2     |
| A33_1481 | 7     | 8     | 8     |
| A33_1482 | 8     | 11    | 7     |
| A33_1483 | 23    | 22    | 20    |
| A33_1484 | 3     | 7     | 5     |
| A33_1485 | 7     | 7     | 6     |
| A33_1486 | 1     | 4     | 1     |
| A33_1487 | 6     | 5     | 5     |
| A33_1488 | 14    | 13    | 15    |
| A33_1489 | 0     | 1     | 1     |
| A33_1490 | 2     | 4     | 2     |
| A33_1491 | 28    | 25    | 24    |
| A33_1492 | 15    | 13    | 8     |
| A33_1493 | 8     | 5     | 2     |
| A33_1494 | 19    | 13    | 8     |
| A33_1495 | 2     | 2     | 0     |
| A33_1496 | 3     | 4     | 3     |
| A33_1497 | 14    | 10    | 8     |
| A33_1498 | 12    | 10    | 9     |
| A33_1499 | 6     | 3     | 4     |
| A33_1500 | 11    | 11    | 8     |
| A33_1501 | 8     | 7     | 4     |
| A33_1502 | 2554  | 4261  | 8692  |
| A33_1503 | 11666 | 23107 | 34677 |
| A33_1504 | 43    | 38    | 23    |
| A33_1505 | 90    | 89    | 63    |
| A33_1506 | 97    | 73    | 54    |
| A33_1507 | 224   | 132   | 101   |
| A33_1508 | 118   | 98    | 88    |
| A33_1509 | 81    | 72    | 50    |
| A33_1510 | 49    | 52    | 43    |
| A33_1511 | 19    | 19    | 10    |
| A33_1512 | 12    | 13    | 19    |
| A33_1513 | 10    | 6     | 7     |
| A33_1514 | 16    | 11    | 13    |
| A33_1515 | 56    | 54    | 42    |
| A33_1516 | 9     | 12    | 8     |
| A33_1517 | 13    | 12    | 9     |
| A33_1518 | 51    | 41    | 38    |
| A33_1519 | 9     | 8     | 11    |
| A33_1520 | 11    | 17    | 8     |
| A33_1521 | 9     | 4     | 4     |
| A33_1522 | 15    | 12    | 14    |



|          |     |     |     |
|----------|-----|-----|-----|
| A33_1523 | 686 | 426 | 273 |
| A33_1524 | 128 | 99  | 77  |
| A33_1525 | 85  | 87  | 204 |
| A33_1527 | 32  | 108 | 88  |
| A33_1528 | 59  | 164 | 267 |
| A33_1529 | 17  | 18  | 15  |
| A33_1530 | 34  | 29  | 33  |
| A33_1531 | 9   | 7   | 8   |
| A33_1532 | 22  | 24  | 15  |
| A33_1533 | 11  | 11  | 12  |
| A33_1534 | 14  | 15  | 14  |
| A33_1535 | 69  | 72  | 65  |
| A33_1536 | 10  | 9   | 8   |
| A33_1537 | 11  | 10  | 13  |
| A33_1538 | 73  | 90  | 34  |
| A33_1539 | 20  | 18  | 11  |
| A33_1540 | 29  | 18  | 20  |
| A33_1541 | 9   | 8   | 7   |
| A33_1542 | 42  | 33  | 19  |
| A33_1543 | 41  | 26  | 31  |
| A33_1544 | 20  | 23  | 20  |
| A33_1545 | 87  | 41  | 69  |
| A33_1546 | 36  | 20  | 17  |
| A33_1547 | 28  | 26  | 17  |
| A33_1548 | 44  | 22  | 27  |
| A33_1549 | 17  | 11  | 23  |
| A33_1550 | 15  | 24  | 28  |
| A33_1552 | 8   | 6   | 9   |
| A33_1553 | 9   | 4   | 6   |
| A33_1554 | 100 | 95  | 79  |
| A33_1555 | 9   | 10  | 6   |
| A33_1556 | 28  | 22  | 30  |
| A33_1557 | 49  | 28  | 49  |
| A33_1558 | 46  | 24  | 39  |
| A33_1559 | 9   | 8   | 8   |
| A33_1560 | 22  | 35  | 18  |
| A33_1561 | 4   | 5   | 3   |
| A33_1562 | 4   | 3   | 2   |
| A33_1563 | 21  | 19  | 15  |
| A33_1564 | 20  | 23  | 18  |
| A33_1565 | 14  | 9   | 9   |
| A33_1566 | 179 | 234 | 200 |
| A33_1567 | 94  | 107 | 53  |
| A33_1568 | 408 | 392 | 289 |
| A33_1569 | 59  | 48  | 36  |
| A33_1570 | 11  | 7   | 6   |
| A33_1571 | 13  | 14  | 10  |
| A33_1572 | 11  | 7   | 7   |

|          |      |      |     |
|----------|------|------|-----|
| A33_1573 | 34   | 29   | 24  |
| A33_1574 | 13   | 15   | 7   |
| A33_1575 | 92   | 120  | 89  |
| A33_1576 | 39   | 46   | 34  |
| A33_1577 | 23   | 49   | 17  |
| A33_1578 | 42   | 58   | 40  |
| A33_1579 | 23   | 14   | 11  |
| A33_1580 | 20   | 14   | 10  |
| A33_1581 | 40   | 17   | 25  |
| A33_1582 | 56   | 18   | 11  |
| A33_1583 | 40   | 33   | 15  |
| A33_1584 | 19   | 22   | 12  |
| A33_1585 | 34   | 27   | 25  |
| A33_1586 | 44   | 28   | 39  |
| A33_1587 | 75   | 36   | 76  |
| A33_1588 | 44   | 31   | 48  |
| A33_1589 | 39   | 38   | 62  |
| A33_1590 | 18   | 16   | 23  |
| A33_1591 | 47   | 53   | 40  |
| A33_1592 | 7    | 5    | 7   |
| A33_1593 | 3    | 5    | 4   |
| A33_1594 | 19   | 17   | 25  |
| A33_1595 | 0    | 0    | 1   |
| A33_1596 | 8    | 5    | 6   |
| A33_1597 | 3    | 2    | 2   |
| A33_1598 | 1    | 1    | 0   |
| A33_1599 | 9    | 9    | 8   |
| A33_1600 | 115  | 83   | 62  |
| A33_1601 | 11   | 10   | 6   |
| A33_1602 | 55   | 57   | 42  |
| A33_1603 | 409  | 244  | 203 |
| A33_1604 | 34   | 37   | 27  |
| A33_1605 | 9    | 15   | 12  |
| A33_1606 | 36   | 34   | 18  |
| A33_1607 | 72   | 65   | 59  |
| A33_1608 | 126  | 84   | 153 |
| A33_1609 | 16   | 11   | 14  |
| A33_1610 | 1541 | 1110 | 452 |
| A33_1611 | 11   | 12   | 9   |
| A33_1612 | 5    | 6    | 4   |
| A33_1613 | 95   | 38   | 74  |
| A33_1614 | 25   | 25   | 18  |
| A33_1615 | 17   | 24   | 19  |
| A33_1616 | 6    | 7    | 6   |
| A33_1617 | 30   | 28   | 28  |
| A33_1618 | 8    | 3    | 7   |
| A33_1619 | 14   | 18   | 11  |
| A33_1620 | 30   | 35   | 13  |

|          |      |      |      |
|----------|------|------|------|
| A33_1621 | 81   | 81   | 104  |
| A33_1622 | 50   | 40   | 65   |
| A33_1623 | 73   | 69   | 54   |
| A33_1624 | 73   | 85   | 62   |
| A33_1625 | 44   | 41   | 26   |
| A33_1626 | 135  | 136  | 86   |
| A33_1627 | 8    | 10   | 6    |
| A33_1628 | 17   | 15   | 11   |
| A33_1629 | 147  | 221  | 130  |
| A33_1630 | 11   | 9    | 7    |
| A33_1631 | 27   | 36   | 35   |
| A33_1632 | 69   | 69   | 40   |
| A33_1633 | 157  | 162  | 149  |
| A33_1634 | 112  | 116  | 56   |
| A33_1635 | 6    | 12   | 4    |
| A33_1636 | 0    | 0    | 0    |
| A33_1637 | 85   | 75   | 85   |
| A33_1638 | 25   | 16   | 8    |
| A33_1639 | 64   | 58   | 63   |
| A33_1640 | 1    | 2    | 0    |
| A33_1641 | 17   | 9    | 12   |
| A33_1642 | 27   | 19   | 18   |
| A33_1643 | 96   | 108  | 72   |
| A33_1644 | 1    | 2    | 4    |
| A33_1645 | 218  | 196  | 170  |
| A33_1646 | 242  | 237  | 79   |
| A33_1647 | 121  | 79   | 39   |
| A33_1648 | 0    | 0    | 3    |
| A33_1649 | 4    | 8    | 5    |
| A33_1650 | 66   | 64   | 85   |
| A33_1651 | 106  | 100  | 62   |
| A33_1652 | 141  | 139  | 125  |
| A33_1653 | 3    | 9    | 12   |
| A33_1654 | 20   | 22   | 10   |
| A33_1655 | 21   | 20   | 14   |
| A33_1656 | 39   | 46   | 37   |
| A33_1657 | 15   | 18   | 12   |
| A33_1658 | 29   | 26   | 27   |
| A33_1659 | 7070 | 8011 | 7049 |
| A33_1660 | 31   | 38   | 31   |
| A33_1662 | 2    | 1    | 2    |
| A33_1663 | 346  | 3    | 7    |
| A33_1664 | 52   | 0    | 25   |
| A33_1665 | 153  | 1    | 7    |
| A33_1666 | 108  | 4    | 3    |
| A33_1667 | 103  | 5    | 5    |
| A33_1668 | 134  | 11   | 5    |
| A33_1669 | 118  | 16   | 19   |

|          |      |    |    |
|----------|------|----|----|
| A33_1671 | 463  | 12 | 9  |
| A33_1672 | 101  | 2  | 2  |
| A33_1673 | 141  | 1  | 1  |
| A33_1674 | 9080 | 28 | 33 |
| A33_1675 | 95   | 28 | 0  |
| A33_1676 | 774  | 51 | 89 |
| A33_1677 | 748  | 48 | 41 |
| A33_1678 | 168  | 7  | 10 |
| A33_1679 | 148  | 8  | 10 |
| A33_1680 | 184  | 9  | 11 |
| A33_1681 | 201  | 5  | 11 |
| A33_1682 | 183  | 9  | 9  |
| A33_1683 | 270  | 4  | 4  |
| A33_1684 | 86   | 12 | 11 |
| A33_1685 | 84   | 0  | 1  |
| A33_1686 | 135  | 1  | 1  |
| A33_1687 | 135  | 4  | 2  |
| A33_1688 | 1656 | 32 | 24 |
| A33_1689 | 384  | 12 | 6  |
| A33_1690 | 74   | 10 | 8  |
| A33_1691 | 77   | 3  | 3  |
| A33_1692 | 97   | 7  | 9  |
| A33_1693 | 78   | 9  | 9  |
| A33_1694 | 76   | 3  | 4  |
| A33_1695 | 183  | 79 | 74 |
| A33_1696 | 43   | 7  | 4  |
| A33_1697 | 15   | 0  | 1  |
| A33_1698 | 36   | 5  | 3  |
| A33_1699 | 6    | 2  | 1  |
| A33_1700 | 52   | 7  | 9  |
| A33_1701 | 105  | 22 | 25 |
| A33_1702 | 1    | 0  | 0  |
| A33_1703 | 56   | 37 | 20 |
| A33_1704 | 6    | 1  | 0  |
| A33_1705 | 19   | 3  | 4  |
| A33_1706 | 28   | 18 | 11 |
| A33_1707 | 9    | 10 | 11 |
| A33_1708 | 15   | 16 | 16 |
| A33_1709 | 57   | 53 | 37 |
| A33_1710 | 13   | 10 | 9  |
| A33_1711 | 6    | 6  | 8  |
| A33_1712 | 4    | 6  | 9  |
| A33_1713 | 19   | 13 | 37 |
| A33_1714 | 6    | 6  | 8  |
| A33_1715 | 14   | 15 | 12 |
| A33_1716 | 11   | 11 | 9  |
| A33_1717 | 20   | 19 | 13 |
| A33_1718 | 5    | 0  | 3  |

|          |      |      |     |
|----------|------|------|-----|
| A33_1719 | 1    | 2    | 0   |
| A33_1720 | 2    | 0    | 0   |
| A33_1721 | 0    | 1    | 0   |
| A33_1722 | 4    | 4    | 6   |
| A33_1723 | 1    | 1    | 0   |
| A33_1724 | 1    | 2    | 2   |
| A33_1725 | 107  | 96   | 109 |
| A33_1726 | 49   | 44   | 43  |
| A33_1727 | 160  | 183  | 153 |
| A33_1728 | 12   | 9    | 5   |
| A33_1729 | 4    | 0    | 0   |
| A33_1730 | 3    | 2    | 1   |
| A33_1731 | 4    | 2    | 1   |
| A33_1732 | 35   | 18   | 15  |
| A33_1733 | 114  | 154  | 67  |
| A33_1734 | 1828 | 1333 | 239 |
| A33_1735 | 295  | 274  | 108 |
| A33_1736 | 129  | 98   | 85  |
| A33_1737 | 184  | 164  | 107 |
| A33_1738 | 81   | 58   | 34  |
| A33_1739 | 131  | 145  | 146 |
| A33_1740 | 594  | 494  | 596 |
| A33_1743 | 135  | 179  | 156 |
| A33_1744 | 104  | 134  | 90  |
| A33_1745 | 190  | 212  | 110 |
| A33_1746 | 134  | 133  | 140 |
| A33_1747 | 67   | 40   | 56  |
| A33_1748 | 77   | 72   | 69  |
| A33_1749 | 42   | 35   | 38  |
| A33_1750 | 19   | 17   | 12  |
| A33_1751 | 42   | 36   | 25  |
| A33_1752 | 79   | 78   | 46  |
| A33_1753 | 76   | 76   | 34  |
| A33_1754 | 27   | 28   | 20  |
| A33_1755 | 36   | 18   | 14  |
| A33_1756 | 23   | 19   | 11  |
| A33_1757 | 79   | 80   | 42  |
| A33_1760 | 52   | 57   | 38  |
| A33_1761 | 21   | 20   | 15  |
| A33_1762 | 14   | 10   | 10  |
| A33_1763 | 46   | 26   | 43  |
| A33_1764 | 194  | 207  | 49  |
| A33_1765 | 13   | 24   | 8   |
| A33_1766 | 43   | 58   | 32  |
| A33_1767 | 180  | 273  | 81  |
| A33_1768 | 85   | 121  | 57  |
| A33_1772 | 36   | 36   | 34  |
| A33_1773 | 84   | 29   | 48  |

|          |     |     |     |
|----------|-----|-----|-----|
| A33_1774 | 15  | 11  | 3   |
| A33_1775 | 3   | 3   | 2   |
| A33_1776 | 191 | 232 | 172 |
| A33_1777 | 233 | 111 | 62  |
| A33_1778 | 89  | 53  | 46  |
| A33_1779 | 546 | 295 | 242 |
| A33_1780 | 37  | 41  | 36  |
| A33_1781 | 42  | 37  | 68  |
| A33_1782 | 56  | 47  | 63  |
| A33_1783 | 131 | 132 | 87  |
| A33_1784 | 19  | 26  | 15  |
| A33_1785 | 19  | 26  | 21  |
| A33_1786 | 20  | 19  | 21  |
| A33_1787 | 34  | 37  | 31  |
| A33_1788 | 27  | 23  | 11  |
| A33_1789 | 60  | 62  | 34  |
| A33_1792 | 41  | 49  | 31  |
| A33_1794 | 18  | 25  | 10  |
| A33_1795 | 75  | 58  | 49  |
| A33_1796 | 1   | 0   | 0   |
| A33_1797 | 242 | 205 | 119 |
| A33_1798 | 83  | 77  | 81  |
| A33_1799 | 0   | 0   | 0   |
| A33_1800 | 85  | 71  | 65  |
| A33_1801 | 68  | 70  | 59  |
| A33_1802 | 134 | 88  | 67  |
| A33_1803 | 39  | 24  | 32  |
| A33_1804 | 38  | 28  | 14  |
| A33_1805 | 41  | 51  | 24  |
| A33_1806 | 18  | 14  | 12  |
| A33_1807 | 10  | 11  | 5   |
| A33_1808 | 71  | 75  | 70  |
| A33_1809 | 256 | 271 | 307 |
| A33_1810 | 203 | 140 | 129 |
| A33_1811 | 27  | 28  | 18  |
| A33_1812 | 146 | 180 | 180 |
| A33_1813 | 2   | 3   | 1   |
| A33_1814 | 95  | 87  | 51  |
| A33_1815 | 36  | 34  | 29  |
| A33_1816 | 22  | 22  | 16  |
| A33_1817 | 1   | 3   | 3   |
| A33_1818 | 9   | 13  | 9   |
| A33_1819 | 9   | 11  | 9   |
| A33_1820 | 12  | 13  | 9   |
| A33_1821 | 11  | 16  | 9   |
| A33_1822 | 2   | 3   | 3   |
| A33_1823 | 39  | 50  | 22  |
| A33_1824 | 75  | 90  | 61  |

|          |      |     |     |
|----------|------|-----|-----|
| A33_1825 | 373  | 338 | 211 |
| A33_1826 | 611  | 575 | 282 |
| A33_1827 | 360  | 259 | 154 |
| A33_1828 | 81   | 66  | 51  |
| A33_1829 | 2    | 0   | 1   |
| A33_1830 | 89   | 80  | 63  |
| A33_1831 | 1056 | 763 | 479 |
| A33_1832 | 121  | 83  | 91  |
| A33_1835 | 0    | 0   | 0   |
| A33_1836 | 0    | 0   | 0   |
| A33_1837 | 579  | 597 | 319 |
| A33_1838 | 192  | 145 | 97  |
| A33_1840 | 38   | 44  | 19  |
| A33_1841 | 13   | 17  | 6   |
| A33_1842 | 94   | 74  | 88  |
| A33_1843 | 98   | 63  | 89  |
| A33_1844 | 485  | 550 | 193 |
| A33_1845 | 24   | 20  | 12  |
| A33_1846 | 1166 | 771 | 736 |
| A33_1847 | 47   | 23  | 25  |
| A33_1848 | 21   | 9   | 10  |
| A33_1849 | 29   | 22  | 19  |
| A33_1850 | 23   | 21  | 18  |
| A33_1851 | 9    | 6   | 8   |
| A33_1852 | 217  | 164 | 178 |
| A33_1853 | 47   | 43  | 28  |
| A33_1854 | 15   | 18  | 8   |
| A33_1855 | 34   | 23  | 21  |
| A33_1856 | 18   | 13  | 28  |
| A33_1857 | 248  | 228 | 476 |
| A33_1858 | 33   | 26  | 30  |
| A33_1859 | 17   | 14  | 10  |
| A33_1860 | 7    | 9   | 8   |
| A33_1861 | 11   | 9   | 8   |
| A33_1862 | 1    | 1   | 1   |
| A33_1863 | 71   | 52  | 80  |
| A33_1864 | 301  | 179 | 284 |
| A33_1865 | 9    | 6   | 4   |
| A33_1866 | 10   | 11  | 8   |
| A33_1867 | 39   | 37  | 36  |
| A33_1868 | 141  | 161 | 140 |
| A33_1869 | 109  | 123 | 53  |
| A33_1870 | 11   | 15  | 7   |
| A33_1871 | 46   | 29  | 27  |
| A33_1872 | 46   | 20  | 34  |
| A33_1873 | 196  | 163 | 90  |
| A33_1874 | 67   | 69  | 24  |
| A33_1875 | 598  | 698 | 256 |

|          |      |      |      |
|----------|------|------|------|
| A33_1876 | 0    | 0    | 0    |
| A33_1877 | 87   | 59   | 52   |
| A33_1878 | 18   | 16   | 16   |
| A33_1879 | 27   | 22   | 8    |
| A33_1880 | 51   | 68   | 24   |
| A33_1881 | 6    | 6    | 6    |
| A33_1882 | 3    | 2    | 2    |
| A33_1883 | 17   | 16   | 13   |
| A33_1884 | 20   | 14   | 18   |
| A33_1885 | 37   | 24   | 26   |
| A33_1886 | 124  | 96   | 106  |
| A33_1887 | 51   | 43   | 50   |
| A33_1888 | 30   | 32   | 24   |
| A33_1889 | 31   | 28   | 19   |
| A33_1890 | 43   | 54   | 36   |
| A33_1891 | 8    | 4    | 2    |
| A33_1892 | 28   | 28   | 18   |
| A33_1893 | 16   | 14   | 9    |
| A33_1894 | 69   | 72   | 42   |
| A33_1895 | 22   | 18   | 18   |
| A33_1896 | 87   | 96   | 45   |
| A33_1897 | 17   | 17   | 19   |
| A33_1898 | 75   | 53   | 48   |
| A33_1899 | 80   | 79   | 61   |
| A33_1900 | 106  | 50   | 87   |
| A33_1901 | 9    | 10   | 8    |
| A33_1902 | 0    | 0    | 0    |
| A33_1903 | 40   | 51   | 21   |
| A33_1904 | 84   | 85   | 48   |
| A33_1905 | 48   | 36   | 25   |
| A33_1906 | 38   | 33   | 20   |
| A33_1907 | 55   | 41   | 34   |
| A33_1908 | 0    | 0    | 2    |
| A33_1911 | 6    | 12   | 8    |
| A33_1912 | 27   | 24   | 13   |
| A33_1913 | 9    | 7    | 4    |
| A33_1914 | 22   | 17   | 10   |
| A33_1915 | 89   | 36   | 38   |
| A33_1916 | 281  | 198  | 102  |
| A33_1917 | 85   | 73   | 75   |
| A33_1918 | 22   | 16   | 11   |
| A33_1919 | 499  | 552  | 534  |
| A33_1920 | 3665 | 2942 | 3223 |
| A33_1921 | 35   | 23   | 15   |
| A33_1922 | 12   | 8    | 6    |
| A33_1923 | 469  | 226  | 155  |
| A33_1924 | 26   | 25   | 14   |
| A33_1925 | 19   | 22   | 13   |



|          |      |      |      |
|----------|------|------|------|
| A33_1926 | 72   | 63   | 51   |
| A33_1927 | 58   | 58   | 47   |
| A33_1928 | 119  | 151  | 80   |
| A33_1929 | 53   | 64   | 36   |
| A33_1930 | 763  | 792  | 352  |
| A33_1931 | 72   | 58   | 39   |
| A33_1933 | 586  | 555  | 947  |
| A33_1934 | 558  | 372  | 304  |
| A33_1935 | 228  | 193  | 122  |
| A33_1936 | 309  | 258  | 243  |
| A33_1937 | 67   | 58   | 64   |
| A33_1938 | 8    | 11   | 4    |
| A33_1939 | 3    | 5    | 3    |
| A33_1940 | 308  | 200  | 149  |
| A33_1941 | 24   | 17   | 9    |
| A33_1942 | 284  | 294  | 86   |
| A33_1943 | 55   | 43   | 43   |
| A33_1944 | 21   | 18   | 13   |
| A33_1945 | 92   | 120  | 50   |
| A33_1946 | 187  | 155  | 118  |
| A33_1947 | 86   | 70   | 70   |
| A33_1948 | 3701 | 3225 | 8318 |
| A33_1949 | 0    | 4    | 2    |
| A33_1950 | 11   | 10   | 10   |
| A33_1951 | 19   | 16   | 11   |
| A33_1952 | 196  | 244  | 55   |
| A33_1953 | 336  | 256  | 86   |
| A33_1954 | 6    | 3    | 3    |
| A33_1955 | 24   | 33   | 15   |
| A33_1956 | 44   | 44   | 29   |
| A33_1957 | 55   | 47   | 24   |
| A33_1958 | 61   | 62   | 52   |
| A33_1959 | 28   | 24   | 20   |
| A33_1960 | 37   | 35   | 24   |
| A33_1961 | 51   | 52   | 31   |
| A33_1962 | 28   | 24   | 11   |
| A33_1963 | 47   | 49   | 26   |
| A33_1964 | 28   | 19   | 16   |
| A33_1965 | 29   | 31   | 14   |
| A33_1966 | 829  | 361  | 559  |
| A33_1967 | 622  | 267  | 375  |
| A33_1968 | 322  | 191  | 287  |
| A33_1970 | 177  | 97   | 227  |
| A33_1971 | 202  | 134  | 152  |
| A33_1972 | 490  | 384  | 317  |
| A33_1973 | 415  | 285  | 309  |
| A33_1974 | 610  | 441  | 534  |
| A33_1975 | 314  | 294  | 250  |

|          |     |     |     |
|----------|-----|-----|-----|
| A33_1976 | 96  | 54  | 85  |
| A33_1977 | 43  | 37  | 28  |
| A33_1978 | 330 | 221 | 142 |
| A33_1979 | 19  | 18  | 8   |
| A33_1980 | 33  | 30  | 24  |
| A33_1981 | 42  | 41  | 24  |
| A33_1982 | 29  | 25  | 35  |
| A33_1983 | 78  | 110 | 150 |
| A33_1984 | 43  | 53  | 63  |
| A33_1985 | 80  | 123 | 355 |
| A33_1987 | 31  | 23  | 30  |
| A33_1988 | 31  | 65  | 40  |
| A33_1989 | 11  | 14  | 19  |
| A33_1990 | 652 | 367 | 443 |
| A33_1991 | 269 | 225 | 137 |
| A33_1992 | 345 | 280 | 383 |
| A33_1993 | 339 | 304 | 294 |
| A33_1994 | 526 | 298 | 523 |
| A33_1995 | 313 | 273 | 250 |
| A33_1996 | 340 | 341 | 214 |
| A33_1997 | 203 | 136 | 106 |
| A33_1998 | 403 | 386 | 178 |
| A33_1999 | 46  | 53  | 36  |
| A33_2000 | 43  | 38  | 15  |
| A33_2001 | 174 | 175 | 71  |
| A33_2002 | 235 | 237 | 123 |
| A33_2003 | 1   | 1   | 2   |
| A33_2005 | 1   | 4   | 2   |
| A33_2006 | 36  | 27  | 13  |
| A33_2008 | 121 | 126 | 71  |
| A33_2009 | 184 | 220 | 85  |
| A33_2012 | 0   | 0   | 0   |
| A33_2013 | 290 | 323 | 190 |
| A33_2014 | 22  | 21  | 11  |
| A33_2015 | 78  | 68  | 40  |
| A33_2016 | 48  | 71  | 43  |
| A33_2017 | 11  | 11  | 8   |
| A33_2018 | 32  | 48  | 19  |
| A33_2019 | 141 | 217 | 84  |
| A33_2020 | 43  | 46  | 28  |
| A33_2021 | 35  | 52  | 25  |
| A33_2022 | 63  | 45  | 70  |
| A33_2023 | 59  | 33  | 45  |
| A33_2024 | 102 | 39  | 77  |
| A33_2025 | 62  | 33  | 55  |
| A33_2026 | 165 | 100 | 141 |
| A33_2027 | 569 | 291 | 580 |
| A33_2028 | 121 | 74  | 145 |

|          |     |     |     |
|----------|-----|-----|-----|
| A33_2029 | 197 | 125 | 228 |
| A33_2030 | 117 | 53  | 98  |
| A33_2031 | 2   | 1   | 0   |
| A33_2032 | 47  | 17  | 37  |
| A33_2033 | 36  | 19  | 35  |
| A33_2034 | 44  | 28  | 34  |
| A33_2035 | 177 | 112 | 139 |
| A33_2036 | 76  | 55  | 69  |
| A33_2037 | 639 | 739 | 307 |
| A33_2038 | 39  | 29  | 31  |
| A33_2039 | 39  | 37  | 27  |
| A33_2040 | 173 | 163 | 151 |
| A33_2041 | 168 | 105 | 154 |
| A33_2042 | 283 | 208 | 301 |
| A33_2043 | 154 | 122 | 144 |
| A33_2044 | 337 | 292 | 257 |
| A33_2045 | 296 | 141 | 111 |
| A33_2046 | 145 | 47  | 48  |
| A33_2047 | 48  | 21  | 17  |
| A33_2048 | 95  | 92  | 50  |
| A33_2049 | 23  | 24  | 12  |
| A33_2050 | 41  | 34  | 18  |
| A33_2051 | 308 | 194 | 275 |
| A33_2052 | 42  | 55  | 23  |
| A33_2053 | 19  | 27  | 16  |
| A33_2054 | 62  | 68  | 45  |
| A33_2055 | 188 | 124 | 102 |
| A33_2056 | 71  | 60  | 48  |
| A33_2057 | 257 | 281 | 146 |
| A33_2058 | 104 | 81  | 55  |
| A33_2059 | 235 | 190 | 117 |
| A33_2060 | 133 | 59  | 48  |
| A33_2061 | 36  | 44  | 22  |
| A33_2062 | 35  | 27  | 15  |
| A33_2063 | 105 | 103 | 52  |
| A33_2064 | 182 | 180 | 195 |
| A33_2065 | 59  | 85  | 64  |
| A33_2066 | 10  | 15  | 17  |
| A33_2067 | 88  | 95  | 53  |
| A33_2068 | 1   | 1   | 2   |
| A33_2069 | 9   | 6   | 5   |
| A33_2070 | 10  | 13  | 5   |
| A33_2072 | 117 | 112 | 60  |
| A33_2073 | 75  | 58  | 33  |
| A33_2074 | 65  | 41  | 37  |
| A33_2075 | 22  | 9   | 11  |
| A33_2076 | 40  | 23  | 35  |
| A33_2077 | 29  | 26  | 22  |

|          |     |     |      |
|----------|-----|-----|------|
| A33_2078 | 49  | 59  | 32   |
| A33_2079 | 7   | 5   | 2    |
| A33_2080 | 45  | 35  | 28   |
| A33_2081 | 194 | 173 | 211  |
| A33_2083 | 37  | 28  | 17   |
| A33_2085 | 86  | 73  | 160  |
| A33_2086 | 0   | 2   | 1    |
| A33_2087 | 176 | 148 | 163  |
| A33_2088 | 0   | 0   | 0    |
| A33_2089 | 0   | 0   | 0    |
| A33_2090 | 0   | 0   | 0    |
| A33_2091 | 116 | 95  | 123  |
| A33_2092 | 0   | 0   | 0    |
| A33_2093 | 752 | 593 | 1036 |
| A33_2094 | 0   | 0   | 0    |
| A33_2095 | 17  | 11  | 7    |
| A33_2096 | 0   | 0   | 0    |
| A33_2097 | 0   | 0   | 0    |
| A33_2098 | 0   | 0   | 0    |
| A33_2099 | 0   | 0   | 0    |
| A33_2100 | 271 | 89  | 128  |
| A33_2101 | 0   | 0   | 0    |
| A33_2102 | 0   | 0   | 0    |
| A33_2103 | 8   | 10  | 9    |
| A33_2104 | 0   | 0   | 0    |
| A33_2105 | 10  | 16  | 10   |
| A33_2106 | 4   | 6   | 5    |
| A33_2107 | 48  | 63  | 41   |
| A33_2108 | 19  | 20  | 15   |
| A33_2109 | 1   | 1   | 2    |
| A33_2110 | 2   | 5   | 5    |
| A33_2111 | 3   | 2   | 4    |
| A33_2112 | 4   | 4   | 6    |
| A33_2113 | 6   | 0   | 7    |
| A33_2116 | 3   | 5   | 16   |
| A33_2117 | 2   | 4   | 11   |
| A33_2118 | 1   | 0   | 8    |
| A33_2119 | 8   | 7   | 19   |
| A33_2120 | 3   | 3   | 6    |
| A33_2122 | 5   | 3   | 9    |
| A33_2123 | 6   | 4   | 5    |
| A33_2124 | 18  | 18  | 51   |
| A33_2125 | 20  | 22  | 34   |
| A33_2126 | 12  | 8   | 19   |
| A33_2127 | 4   | 4   | 4    |
| A33_2128 | 1   | 2   | 2    |
| A33_2129 | 10  | 12  | 10   |
| A33_2130 | 17  | 29  | 10   |

|          |      |      |      |
|----------|------|------|------|
| A33_2131 | 10   | 7    | 14   |
| A33_2132 | 1    | 0    | 0    |
| A33_2133 | 0    | 1    | 1    |
| A33_2134 | 1    | 2    | 1    |
| A33_2135 | 4    | 4    | 3    |
| A33_2136 | 8    | 6    | 4    |
| A33_2137 | 0    | 0    | 1    |
| A33_2138 | 5    | 9    | 5    |
| A33_2139 | 1    | 4    | 1    |
| A33_2140 | 1    | 1    | 2    |
| A33_2141 | 1    | 0    | 2    |
| A33_2142 | 4    | 4    | 10   |
| A33_2143 | 5    | 3    | 16   |
| A33_2144 | 6    | 1    | 16   |
| A33_2145 | 63   | 62   | 22   |
| A33_2146 | 128  | 110  | 47   |
| A33_2147 | 15   | 24   | 9    |
| A33_2148 | 0    | 0    | 0    |
| A33_2149 | 957  | 273  | 367  |
| A33_2150 | 139  | 54   | 155  |
| A33_2152 | 0    | 0    | 0    |
| A33_2153 | 0    | 0    | 0    |
| A33_2154 | 0    | 0    | 0    |
| A33_2155 | 352  | 160  | 145  |
| A33_2156 | 110  | 64   | 69   |
| A33_2157 | 371  | 390  | 189  |
| A33_2158 | 127  | 128  | 71   |
| A33_2159 | 300  | 228  | 152  |
| A33_2160 | 409  | 390  | 190  |
| A33_2161 | 467  | 150  | 240  |
| A33_2162 | 560  | 210  | 209  |
| A33_2163 | 50   | 30   | 31   |
| A33_2164 | 8    | 12   | 12   |
| A33_2165 | 41   | 73   | 55   |
| A33_2166 | 24   | 40   | 24   |
| A33_2167 | 18   | 15   | 9    |
| A33_2168 | 879  | 929  | 371  |
| A33_2169 | 80   | 65   | 47   |
| A33_2170 | 46   | 32   | 30   |
| A33_2171 | 172  | 130  | 65   |
| A33_2172 | 6    | 9    | 7    |
| A33_2173 | 0    | 1    | 0    |
| A33_2174 | 4    | 1    | 0    |
| A33_2175 | 9    | 8    | 5    |
| A33_2176 | 5    | 8    | 10   |
| A33_2177 | 1553 | 1232 | 2180 |
| A33_2178 | 26   | 31   | 22   |
| A33_2179 | 19   | 21   | 14   |

|          |      |      |      |
|----------|------|------|------|
| A33_2180 | 37   | 51   | 21   |
| A33_2181 | 74   | 44   | 27   |
| A33_2182 | 23   | 28   | 16   |
| A33_2183 | 34   | 23   | 25   |
| A33_2184 | 64   | 107  | 121  |
| A33_2185 | 151  | 203  | 145  |
| A33_2186 | 260  | 291  | 140  |
| A33_2187 | 45   | 37   | 33   |
| A33_2188 | 65   | 79   | 59   |
| A33_2189 | 152  | 184  | 108  |
| A33_2190 | 13   | 16   | 7    |
| A33_2191 | 104  | 107  | 43   |
| A33_2192 | 23   | 25   | 11   |
| A33_2193 | 44   | 37   | 30   |
| A33_2194 | 10   | 8    | 4    |
| A33_2195 | 86   | 90   | 42   |
| A33_2196 | 25   | 17   | 21   |
| A33_2197 | 1228 | 1135 | 1137 |
| A33_2198 | 26   | 26   | 19   |
| A33_2199 | 74   | 91   | 42   |
| A33_2200 | 59   | 67   | 43   |
| A33_2201 | 13   | 19   | 16   |
| A33_2202 | 11   | 14   | 11   |
| A33_2203 | 83   | 74   | 67   |
| A33_2204 | 81   | 50   | 53   |
| A33_2205 | 198  | 151  | 123  |
| A33_2206 | 284  | 245  | 186  |
| A33_2207 | 101  | 96   | 65   |
| A33_2208 | 158  | 143  | 94   |
| A33_2211 | 142  | 167  | 82   |
| A33_2212 | 80   | 112  | 68   |
| A33_2213 | 145  | 101  | 51   |
| A33_2214 | 228  | 133  | 139  |
| A33_2215 | 73   | 68   | 30   |
| A33_2216 | 22   | 21   | 20   |
| A33_2217 | 278  | 198  | 80   |
| A33_2218 | 12   | 15   | 15   |
| A33_2219 | 13   | 11   | 9    |
| A33_2220 | 86   | 79   | 58   |
| A33_2221 | 100  | 62   | 53   |
| A33_2222 | 99   | 92   | 97   |
| A33_2223 | 123  | 102  | 79   |
| A33_2224 | 106  | 77   | 64   |
| A33_2225 | 132  | 97   | 39   |
| A33_2226 | 70   | 64   | 59   |
| A33_2227 | 27   | 20   | 15   |
| A33_2228 | 112  | 104  | 30   |
| A33_2229 | 15   | 6    | 4    |

|          |     |     |     |
|----------|-----|-----|-----|
| A33_2230 | 39  | 30  | 21  |
| A33_2231 | 245 | 187 | 104 |
| A33_2232 | 28  | 32  | 25  |
| A33_2233 | 71  | 47  | 35  |
| A33_2234 | 25  | 26  | 8   |
| A33_2235 | 39  | 41  | 22  |
| A33_2236 | 20  | 16  | 12  |
| A33_2237 | 11  | 15  | 8   |
| A33_2240 | 88  | 79  | 50  |
| A33_2241 | 21  | 39  | 34  |
| A33_2242 | 42  | 40  | 36  |
| A33_2243 | 68  | 61  | 30  |
| A33_2244 | 270 | 214 | 188 |
| A33_2245 | 262 | 145 | 169 |
| A33_2246 | 401 | 309 | 345 |
| A33_2247 | 557 | 486 | 636 |
| A33_2248 | 215 | 178 | 170 |
| A33_2249 | 272 | 217 | 135 |
| A33_2250 | 43  | 48  | 27  |
| A33_2251 | 11  | 9   | 10  |
| A33_2252 | 94  | 69  | 51  |
| A33_2253 | 27  | 24  | 22  |
| A33_2254 | 11  | 10  | 8   |
| A33_2255 | 145 | 129 | 93  |
| A33_2256 | 116 | 109 | 70  |
| A33_2257 | 85  | 52  | 39  |
| A33_2258 | 106 | 66  | 67  |
| A33_2259 | 15  | 14  | 8   |
| A33_2260 | 20  | 18  | 16  |
| A33_2261 | 16  | 13  | 16  |
| A33_2262 | 8   | 7   | 6   |
| A33_2263 | 10  | 11  | 5   |
| A33_2264 | 64  | 61  | 35  |
| A33_2265 | 32  | 15  | 18  |
| A33_2266 | 14  | 9   | 5   |
| A33_2267 | 47  | 31  | 20  |
| A33_2268 | 32  | 32  | 23  |
| A33_2269 | 15  | 18  | 13  |
| A33_2270 | 31  | 28  | 27  |
| A33_2271 | 28  | 20  | 16  |
| A33_2272 | 7   | 6   | 6   |
| A33_2273 | 117 | 94  | 121 |
| A33_2274 | 28  | 17  | 12  |
| A33_2275 | 4   | 3   | 3   |
| A33_2276 | 38  | 41  | 20  |
| A33_2277 | 17  | 15  | 13  |
| A33_2278 | 33  | 35  | 22  |
| A33_2279 | 14  | 20  | 16  |

|          |      |     |      |
|----------|------|-----|------|
| A33_2280 | 50   | 42  | 40   |
| A33_2281 | 10   | 11  | 9    |
| A33_2282 | 12   | 8   | 13   |
| A33_2283 | 5    | 3   | 3    |
| A33_2284 | 142  | 40  | 36   |
| A33_2285 | 74   | 49  | 35   |
| A33_2286 | 407  | 256 | 158  |
| A33_2287 | 27   | 25  | 17   |
| A33_2288 | 79   | 77  | 52   |
| A33_2289 | 65   | 65  | 40   |
| A33_2290 | 80   | 84  | 47   |
| A33_2291 | 275  | 174 | 68   |
| A33_2292 | 59   | 29  | 30   |
| A33_2293 | 29   | 20  | 13   |
| A33_2294 | 98   | 68  | 39   |
| A33_2295 | 10   | 13  | 9    |
| A33_2296 | 137  | 111 | 82   |
| A33_2297 | 45   | 67  | 36   |
| A33_2298 | 31   | 27  | 20   |
| A33_2299 | 81   | 79  | 35   |
| A33_2300 | 34   | 25  | 26   |
| A33_2301 | 1358 | 952 | 1092 |
| A33_2302 | 1185 | 880 | 690  |
| A33_2303 | 25   | 32  | 24   |
| A33_2304 | 63   | 63  | 26   |
| A33_2305 | 1147 | 933 | 441  |
| A33_2306 | 26   | 30  | 23   |
| A33_2307 | 36   | 40  | 32   |
| A33_2308 | 23   | 25  | 18   |
| A33_2309 | 141  | 165 | 109  |
| A33_2310 | 23   | 23  | 21   |
| A33_2311 | 157  | 184 | 77   |
| A33_2312 | 394  | 351 | 265  |
| A33_2313 | 56   | 56  | 28   |
| A33_2314 | 16   | 17  | 12   |
| A33_2315 | 21   | 35  | 21   |
| A33_2316 | 5    | 6   | 3    |
| A33_2317 | 8    | 8   | 6    |
| A33_2318 | 39   | 50  | 31   |
| A33_2319 | 46   | 60  | 29   |
| A33_2320 | 33   | 30  | 24   |
| A33_2321 | 40   | 33  | 30   |
| A33_2322 | 9    | 12  | 8    |
| A33_2323 | 15   | 10  | 16   |
| A33_2324 | 7    | 3   | 6    |
| A33_2325 | 31   | 26  | 14   |
| A33_2326 | 19   | 12  | 13   |
| A33_2328 | 3    | 2   | 2    |



|          |     |     |     |
|----------|-----|-----|-----|
| A33_2329 | 31  | 32  | 19  |
| A33_2330 | 13  | 21  | 6   |
| A33_2331 | 192 | 195 | 67  |
| A33_2332 | 9   | 13  | 8   |
| A33_2333 | 78  | 65  | 51  |
| A33_2334 | 0   | 0   | 0   |
| A33_2335 | 25  | 30  | 14  |
| A33_2338 | 218 | 264 | 170 |
| A33_2339 | 204 | 171 | 161 |
| A33_2340 | 46  | 39  | 33  |
| A33_2341 | 31  | 28  | 24  |
| A33_2342 | 35  | 39  | 33  |
| A33_2343 | 48  | 44  | 36  |
| A33_2344 | 38  | 37  | 46  |
| A33_2345 | 49  | 43  | 65  |
| A33_2346 | 43  | 42  | 58  |
| A33_2347 | 24  | 35  | 27  |
| A33_2348 | 52  | 54  | 66  |
| A33_2349 | 128 | 95  | 106 |
| A33_2350 | 331 | 236 | 178 |
| A33_2351 | 172 | 83  | 156 |
| A33_2352 | 82  | 45  | 49  |
| A33_2353 | 81  | 48  | 51  |
| A33_2354 | 27  | 55  | 18  |
| A33_2355 | 13  | 12  | 14  |
| A33_2356 | 51  | 47  | 42  |
| A33_2357 | 62  | 73  | 47  |
| A33_2358 | 179 | 156 | 106 |
| A33_2359 | 96  | 90  | 63  |
| A33_2360 | 10  | 7   | 6   |
| A33_2361 | 3   | 1   | 1   |
| A33_2362 | 1   | 1   | 0   |
| A33_2363 | 2   | 2   | 1   |
| A33_2364 | 21  | 20  | 13  |
| A33_2365 | 36  | 35  | 23  |
| A33_2366 | 140 | 112 | 87  |
| A33_2367 | 39  | 21  | 22  |
| A33_2368 | 27  | 21  | 30  |
| A33_2369 | 17  | 15  | 15  |
| A33_2370 | 69  | 73  | 68  |
| A33_2371 | 56  | 49  | 37  |
| A33_2372 | 78  | 62  | 60  |
| A33_2373 | 79  | 75  | 55  |
| A33_2375 | 83  | 63  | 43  |
| A33_2376 | 19  | 22  | 22  |
| A33_2377 | 52  | 38  | 33  |
| A33_2378 | 177 | 137 | 101 |
| A33_2379 | 261 | 293 | 147 |

|          |      |      |      |
|----------|------|------|------|
| A33_2380 | 24   | 22   | 14   |
| A33_2381 | 56   | 59   | 21   |
| A33_2382 | 66   | 42   | 50   |
| A33_2383 | 22   | 18   | 13   |
| A33_2384 | 25   | 23   | 14   |
| A33_2385 | 231  | 135  | 106  |
| A33_2386 | 89   | 59   | 44   |
| A33_2387 | 14   | 9    | 3    |
| A33_2388 | 93   | 69   | 65   |
| A33_2389 | 74   | 63   | 55   |
| A33_2390 | 98   | 118  | 71   |
| A33_2391 | 66   | 81   | 40   |
| A33_2392 | 84   | 83   | 59   |
| A33_2393 | 107  | 99   | 67   |
| A33_2394 | 66   | 88   | 33   |
| A33_2395 | 39   | 48   | 23   |
| A33_2396 | 64   | 40   | 37   |
| A33_2397 | 8    | 7    | 9    |
| A33_2398 | 36   | 30   | 35   |
| A33_2399 | 26   | 20   | 20   |
| A33_2400 | 31   | 22   | 17   |
| A33_2401 | 101  | 91   | 86   |
| A33_2402 | 252  | 275  | 306  |
| A33_2403 | 285  | 356  | 261  |
| A33_2404 | 491  | 615  | 449  |
| A33_2405 | 1167 | 1427 | 1442 |
| A33_2406 | 73   | 67   | 42   |
| A33_2407 | 67   | 67   | 67   |
| A33_2408 | 270  | 192  | 133  |
| A33_2409 | 1031 | 674  | 457  |
| A33_2410 | 57   | 54   | 17   |
| A33_2411 | 8718 | 7698 | 4160 |
| A33_2412 | 100  | 84   | 78   |
| A33_2413 | 62   | 62   | 45   |
| A33_2414 | 63   | 56   | 25   |
| A33_2417 | 23   | 26   | 11   |
| A33_2418 | 29   | 29   | 23   |
| A33_2419 | 51   | 54   | 31   |
| A33_2420 | 535  | 772  | 422  |
| A33_2421 | 127  | 207  | 74   |
| A33_2422 | 21   | 21   | 18   |
| A33_2423 | 489  | 438  | 168  |
| A33_2424 | 7    | 4    | 3    |
| A33_2425 | 11   | 9    | 9    |
| A33_2426 | 21   | 16   | 7    |
| A33_2427 | 25   | 34   | 21   |
| A33_2428 | 31   | 32   | 25   |
| A33_2429 | 40   | 39   | 27   |

|          |        |        |        |
|----------|--------|--------|--------|
| A33_2430 | 19     | 18     | 19     |
| A33_2431 | 17     | 18     | 12     |
| A33_2432 | 212419 | 250736 | 276349 |
| A33_2433 | 753    | 618    | 1079   |
| A33_2434 | 0      | 0      | 0      |
| A33_2435 | 0      | 0      | 0      |
| A33_2437 | 1781   | 1384   | 3272   |
| A33_2438 | 11     | 10     | 5      |
| A33_2439 | 53     | 52     | 39     |
| A33_2440 | 65     | 53     | 34     |
| A33_2441 | 215    | 192    | 113    |
| A33_2442 | 33     | 31     | 45     |
| A33_2443 | 39     | 38     | 29     |
| A33_2444 | 53     | 35     | 27     |
| A33_2445 | 14     | 11     | 12     |
| A33_2446 | 13     | 8      | 7      |
| A33_2447 | 1      | 3      | 3      |
| A33_2448 | 49     | 29     | 19     |
| A33_2449 | 11     | 11     | 5      |
| A33_2450 | 16     | 8      | 6      |
| A33_2451 | 9      | 4      | 11     |
| A33_2452 | 68     | 37     | 20     |
| A33_2453 | 16     | 18     | 10     |
| A33_2454 | 87     | 97     | 82     |
| A33_2455 | 128    | 175    | 116    |
| A33_2456 | 346    | 325    | 260    |
| A33_2457 | 92     | 91     | 61     |
| A33_2458 | 140    | 105    | 102    |
| A33_2459 | 41     | 41     | 33     |
| A33_2460 | 88     | 86     | 82     |
| A33_2461 | 15     | 17     | 13     |
| A33_2462 | 22     | 30     | 17     |
| A33_2463 | 138    | 156    | 129    |
| A33_2464 | 98     | 116    | 75     |
| A33_2465 | 103    | 113    | 83     |
| A33_2466 | 80     | 81     | 87     |
| A33_2467 | 514    | 414    | 290    |
| A33_2468 | 624    | 590    | 231    |
| A33_2469 | 112    | 104    | 75     |
| A33_2470 | 83     | 69     | 55     |
| A33_2471 | 70     | 60     | 35     |
| A33_2472 | 25     | 24     | 17     |
| A33_2473 | 131    | 159    | 86     |
| A33_2474 | 302    | 241    | 116    |
| A33_2475 | 3      | 4      | 2      |
| A33_2476 | 4      | 4      | 3      |
| A33_2477 | 17     | 26     | 11     |
| A33_2478 | 57     | 61     | 46     |

|          |      |     |     |
|----------|------|-----|-----|
| A33_2479 | 78   | 74  | 39  |
| A33_2480 | 127  | 131 | 60  |
| A33_2481 | 103  | 104 | 32  |
| A33_2482 | 178  | 156 | 114 |
| A33_2483 | 54   | 69  | 59  |
| A33_2484 | 80   | 80  | 54  |
| A33_2485 | 16   | 13  | 6   |
| A33_2486 | 106  | 55  | 51  |
| A33_2487 | 12   | 16  | 19  |
| A33_2488 | 26   | 20  | 30  |
| A33_2489 | 2    | 3   | 4   |
| A33_2490 | 29   | 25  | 23  |
| A33_2491 | 190  | 220 | 133 |
| A33_2492 | 34   | 33  | 29  |
| A33_2493 | 5    | 6   | 4   |
| A33_2494 | 17   | 22  | 13  |
| A33_2495 | 6    | 8   | 5   |
| A33_2496 | 3    | 3   | 3   |
| A33_2497 | 63   | 68  | 23  |
| A33_2498 | 10   | 11  | 5   |
| A33_2499 | 6    | 8   | 5   |
| A33_2500 | 15   | 14  | 8   |
| A33_2501 | 2    | 2   | 1   |
| A33_2504 | 18   | 26  | 8   |
| A33_2505 | 665  | 485 | 587 |
| A33_2506 | 508  | 315 | 350 |
| A33_2507 | 208  | 169 | 154 |
| A33_2508 | 138  | 92  | 114 |
| A33_2509 | 413  | 248 | 295 |
| A33_2511 | 360  | 251 | 217 |
| A33_2512 | 278  | 178 | 175 |
| A33_2513 | 431  | 223 | 240 |
| A33_2514 | 251  | 178 | 189 |
| A33_2515 | 334  | 244 | 221 |
| A33_2516 | 612  | 383 | 310 |
| A33_2517 | 650  | 436 | 414 |
| A33_2518 | 639  | 407 | 341 |
| A33_2519 | 839  | 913 | 475 |
| A33_2522 | 410  | 233 | 316 |
| A33_2523 | 234  | 201 | 163 |
| A33_2524 | 438  | 367 | 383 |
| A33_2525 | 669  | 523 | 521 |
| A33_2526 | 1010 | 567 | 948 |
| A33_2527 | 297  | 212 | 238 |
| A33_2528 | 201  | 215 | 192 |
| A33_2529 | 328  | 271 | 231 |
| A33_2530 | 144  | 119 | 89  |
| A33_2531 | 182  | 151 | 109 |

|          |      |      |      |
|----------|------|------|------|
| A33_2532 | 48   | 53   | 46   |
| A33_2534 | 0    | 0    | 10   |
| A33_2535 | 41   | 36   | 28   |
| A33_2536 | 6    | 7    | 7    |
| A33_2537 | 56   | 44   | 36   |
| A33_2538 | 323  | 273  | 192  |
| A33_2539 | 142  | 115  | 67   |
| A33_2542 | 176  | 147  | 193  |
| A33_2543 | 73   | 95   | 77   |
| A33_2544 | 107  | 156  | 101  |
| A33_2545 | 53   | 39   | 27   |
| A33_2546 | 195  | 199  | 111  |
| A33_2547 | 41   | 42   | 26   |
| A33_2548 | 9    | 9    | 3    |
| A33_2551 | 309  | 289  | 146  |
| A33_2552 | 191  | 205  | 69   |
| A33_2553 | 508  | 490  | 414  |
| A33_2554 | 415  | 388  | 288  |
| A33_2555 | 1775 | 2064 | 1689 |
| A33_2556 | 29   | 24   | 22   |
| A33_2557 | 26   | 19   | 15   |
| A33_2558 | 23   | 19   | 13   |
| A33_2559 | 24   | 10   | 11   |
| A33_2560 | 50   | 70   | 20   |
| A33_2561 | 45   | 46   | 37   |
| A33_2562 | 73   | 74   | 33   |
| A33_2563 | 23   | 16   | 16   |
| A33_2564 | 152  | 133  | 120  |
| A33_2565 | 67   | 60   | 45   |
| A33_2566 | 72   | 58   | 60   |
| A33_2567 | 25   | 18   | 16   |
| A33_2568 | 1    | 2    | 3    |
| A33_2569 | 5    | 2    | 2    |
| A33_2570 | 1    | 1    | 1    |
| A33_2571 | 2    | 1    | 1    |
| A33_2572 | 31   | 28   | 21   |
| A33_2573 | 0    | 0    | 0    |
| A33_2574 | 30   | 35   | 21   |
| A33_2575 | 4    | 2    | 3    |
| A33_2576 | 21   | 24   | 14   |
| A33_2577 | 119  | 125  | 100  |
| A33_2578 | 5    | 6    | 5    |
| A33_2579 | 29   | 34   | 14   |
| A33_2580 | 14   | 32   | 6    |
| A33_2581 | 287  | 258  | 33   |
| A33_2582 | 23   | 20   | 9    |
| A33_2583 | 105  | 80   | 68   |
| A33_2584 | 69   | 94   | 60   |

|          |     |     |     |
|----------|-----|-----|-----|
| A33_2585 | 27  | 24  | 28  |
| A33_2586 | 98  | 104 | 66  |
| A33_2587 | 55  | 57  | 38  |
| A33_2588 | 145 | 143 | 69  |
| A33_2589 | 103 | 59  | 42  |
| A33_2590 | 26  | 30  | 20  |
| A33_2591 | 422 | 328 | 413 |
| A33_2592 | 128 | 116 | 235 |
| A33_2593 | 88  | 172 | 273 |
| A33_2594 | 229 | 115 | 212 |
| A33_2595 | 195 | 151 | 68  |
| A33_2596 | 32  | 34  | 18  |
| A33_2597 | 448 | 290 | 124 |
| A33_2598 | 825 | 431 | 198 |
| A33_2599 | 156 | 90  | 36  |
| A33_2600 | 65  | 81  | 52  |
| A33_2601 | 43  | 60  | 39  |
| A33_2602 | 31  | 35  | 31  |
| A33_2603 | 36  | 49  | 38  |
| A33_2604 | 510 | 302 | 110 |
| A33_2605 | 6   | 9   | 5   |
| A33_2606 | 522 | 471 | 234 |
| A33_2607 | 27  | 28  | 19  |
| A33_2608 | 117 | 71  | 49  |
| A33_2609 | 46  | 31  | 22  |
| A33_2610 | 69  | 77  | 58  |
| A33_2611 | 18  | 26  | 17  |
| A33_2612 | 73  | 77  | 86  |
| A33_2613 | 18  | 23  | 15  |
| A33_2614 | 318 | 184 | 148 |
| A33_2615 | 19  | 27  | 14  |
| A33_2616 | 22  | 12  | 12  |
| A33_2617 | 13  | 16  | 9   |
| A33_2618 | 28  | 29  | 33  |
| A33_2619 | 56  | 49  | 69  |
| A33_2620 | 116 | 126 | 100 |
| A33_2621 | 25  | 19  | 12  |
| A33_2622 | 149 | 103 | 52  |
| A33_2623 | 41  | 41  | 35  |
| A33_2624 | 42  | 44  | 24  |
| A33_2625 | 94  | 89  | 44  |
| A33_2626 | 52  | 68  | 51  |
| A33_2627 | 33  | 57  | 30  |
| A33_2628 | 18  | 21  | 14  |
| A33_2629 | 83  | 46  | 44  |
| A33_2630 | 35  | 27  | 24  |
| A33_2631 | 627 | 414 | 590 |
| A33_2632 | 299 | 163 | 186 |

|          |      |      |     |
|----------|------|------|-----|
| A33_2633 | 3    | 3    | 2   |
| A33_2634 | 15   | 18   | 12  |
| A33_2635 | 211  | 116  | 110 |
| A33_2636 | 18   | 19   | 13  |
| A33_2637 | 214  | 368  | 50  |
| A33_2638 | 63   | 103  | 18  |
| A33_2639 | 4    | 5    | 4   |
| A33_2640 | 36   | 33   | 14  |
| A33_2641 | 153  | 210  | 121 |
| A33_2642 | 67   | 74   | 57  |
| A33_2643 | 21   | 20   | 26  |
| A33_2644 | 5    | 6    | 5   |
| A33_2645 | 27   | 38   | 22  |
| A33_2646 | 138  | 152  | 62  |
| A33_2647 | 32   | 19   | 20  |
| A33_2648 | 11   | 19   | 16  |
| A33_2649 | 10   | 9    | 11  |
| A33_2650 | 11   | 12   | 17  |
| A33_2651 | 27   | 35   | 35  |
| A33_2652 | 21   | 21   | 11  |
| A33_2653 | 23   | 25   | 19  |
| A33_2654 | 15   | 12   | 11  |
| A33_2655 | 115  | 83   | 56  |
| A33_2656 | 10   | 10   | 6   |
| A33_2658 | 1    | 1    | 1   |
| A33_2659 | 69   | 76   | 42  |
| A33_2660 | 79   | 68   | 48  |
| A33_2661 | 30   | 20   | 19  |
| A33_2662 | 27   | 37   | 43  |
| A33_2663 | 31   | 27   | 35  |
| A33_2664 | 56   | 61   | 57  |
| A33_2665 | 47   | 56   | 48  |
| A33_2666 | 70   | 80   | 79  |
| A33_2667 | 67   | 63   | 54  |
| A33_2668 | 68   | 108  | 74  |
| A33_2669 | 140  | 139  | 140 |
| A33_2670 | 53   | 66   | 71  |
| A33_2671 | 64   | 68   | 71  |
| A33_2672 | 95   | 98   | 91  |
| A33_2673 | 77   | 90   | 64  |
| A33_2674 | 143  | 139  | 111 |
| A33_2675 | 37   | 38   | 21  |
| A33_2676 | 1660 | 1201 | 726 |
| A33_2677 | 25   | 26   | 19  |
| A33_2678 | 65   | 56   | 52  |
| A33_2679 | 102  | 110  | 110 |
| A33_2680 | 24   | 24   | 13  |
| A33_2681 | 2    | 3    | 4   |

|           |     |     |     |
|-----------|-----|-----|-----|
| A33_2682  | 49  | 39  | 38  |
| A33_2683  | 4   | 3   | 2   |
| A33_2684  | 2   | 0   | 2   |
| A33_2685  | 72  | 42  | 29  |
| A33_2686  | 10  | 11  | 5   |
| A33_2687  | 20  | 13  | 13  |
| A33_2688  | 33  | 35  | 35  |
| A33_2689  | 56  | 44  | 39  |
| A33_2690  | 23  | 19  | 15  |
| A33_2691  | 0   | 0   | 0   |
| A33_2692  | 0   | 0   | 0   |
| A33_2693  | 0   | 0   | 0   |
| A33_2694  | 0   | 0   | 0   |
| A33_A0001 | 0   | 0   | 0   |
| A33_A0002 | 131 | 100 | 90  |
| A33_A0003 | 15  | 11  | 6   |
| A33_A0004 | 111 | 27  | 21  |
| A33_A0005 | 125 | 25  | 42  |
| A33_A0006 | 105 | 78  | 86  |
| A33_A0007 | 117 | 105 | 76  |
| A33_A0008 | 41  | 31  | 44  |
| A33_A0009 | 49  | 46  | 19  |
| A33_A0010 | 32  | 38  | 19  |
| A33_A0011 | 50  | 43  | 23  |
| A33_A0012 | 47  | 31  | 14  |
| A33_A0013 | 70  | 55  | 52  |
| A33_A0014 | 12  | 12  | 11  |
| A33_A0015 | 3   | 4   | 2   |
| A33_A0016 | 4   | 6   | 3   |
| A33_A0017 | 1   | 2   | 1   |
| A33_A0018 | 2   | 0   | 0   |
| A33_A0019 | 3   | 11  | 3   |
| A33_A0020 | 48  | 38  | 49  |
| A33_A0021 | 648 | 451 | 444 |
| A33_A0022 | 629 | 556 | 414 |
| A33_A0023 | 147 | 93  | 104 |
| A33_A0024 | 34  | 26  | 19  |
| A33_A0025 | 0   | 0   | 1   |
| A33_A0026 | 92  | 90  | 61  |
| A33_A0027 | 10  | 9   | 4   |
| A33_A0028 | 44  | 88  | 132 |
| A33_A0029 | 22  | 26  | 30  |
| A33_A0030 | 24  | 19  | 15  |
| A33_A0031 | 38  | 32  | 28  |
| A33_A0032 | 108 | 96  | 64  |
| A33_A0033 | 0   | 0   | 1   |
| A33_A0034 | 173 | 262 | 165 |
| A33_A0035 | 9   | 11  | 3   |



|           |     |     |     |
|-----------|-----|-----|-----|
| A33_A0036 | 69  | 58  | 49  |
| A33_A0037 | 484 | 244 | 429 |
| A33_A0038 | 5   | 5   | 3   |
| A33_A0039 | 12  | 11  | 9   |
| A33_A0041 | 45  | 65  | 47  |
| A33_A0042 | 26  | 29  | 18  |
| A33_A0043 | 54  | 68  | 31  |
| A33_A0044 | 24  | 34  | 15  |
| A33_A0045 | 4   | 8   | 7   |
| A33_A0046 | 2   | 1   | 1   |
| A33_A0047 | 2   | 2   | 0   |
| A33_A0048 | 3   | 2   | 3   |
| A33_A0049 | 10  | 8   | 2   |
| A33_A0050 | 42  | 43  | 24  |
| A33_A0051 | 14  | 12  | 14  |
| A33_A0052 | 1   | 1   | 2   |
| A33_A0053 | 5   | 6   | 6   |
| A33_A0054 | 30  | 18  | 11  |
| A33_A0055 | 416 | 159 | 128 |
| A33_A0056 | 1   | 0   | 0   |
| A33_A0057 | 136 | 76  | 84  |
| A33_A0058 | 97  | 51  | 155 |
| A33_A0059 | 226 | 64  | 114 |
| A33_A0060 | 9   | 7   | 6   |
| A33_A0061 | 17  | 18  | 9   |
| A33_A0062 | 3   | 1   | 0   |
| A33_A0063 | 3   | 2   | 4   |
| A33_A0064 | 13  | 16  | 9   |
| A33_A0065 | 1   | 1   | 1   |
| A33_A0066 | 21  | 18  | 19  |
| A33_A0067 | 10  | 9   | 5   |
| A33_A0068 | 347 | 223 | 134 |
| A33_A0069 | 217 | 218 | 207 |
| A33_A0070 | 120 | 55  | 34  |
| A33_A0071 | 295 | 108 | 94  |
| A33_A0072 | 130 | 51  | 40  |
| A33_A0073 | 703 | 263 | 95  |
| A33_A0074 | 210 | 81  | 136 |
| A33_A0076 | 17  | 13  | 16  |
| A33_A0077 | 37  | 30  | 25  |
| A33_A0078 | 44  | 50  | 27  |
| A33_A0079 | 27  | 25  | 11  |
| A33_A0080 | 54  | 69  | 44  |
| A33_A0081 | 7   | 10  | 6   |
| A33_A0082 | 320 | 223 | 200 |
| A33_A0083 | 57  | 59  | 59  |
| A33_A0084 | 73  | 60  | 21  |
| A33_A0085 | 33  | 18  | 21  |

|           |      |      |      |
|-----------|------|------|------|
| A33_A0086 | 8    | 7    | 6    |
| A33_A0087 | 19   | 15   | 10   |
| A33_A0088 | 26   | 16   | 13   |
| A33_A0089 | 23   | 15   | 67   |
| A33_A0090 | 73   | 79   | 31   |
| A33_A0091 | 22   | 16   | 11   |
| A33_A0092 | 21   | 14   | 19   |
| A33_A0093 | 45   | 54   | 31   |
| A33_A0094 | 12   | 8    | 5    |
| A33_A0095 | 46   | 47   | 42   |
| A33_A0096 | 37   | 20   | 18   |
| A33_A0097 | 32   | 79   | 73   |
| A33_A0098 | 84   | 119  | 247  |
| A33_A0099 | 16   | 41   | 74   |
| A33_A0100 | 6    | 17   | 26   |
| A33_A0101 | 6    | 16   | 39   |
| A33_A0102 | 5    | 14   | 24   |
| A33_A0103 | 5    | 19   | 36   |
| A33_A0104 | 5    | 8    | 21   |
| A33_A0105 | 3    | 2    | 6    |
| A33_A0106 | 92   | 110  | 85   |
| A33_A0107 | 152  | 97   | 184  |
| A33_A0108 | 12   | 10   | 8    |
| A33_A0109 | 65   | 66   | 43   |
| A33_A0110 | 4    | 5    | 7    |
| A33_A0111 | 35   | 27   | 27   |
| A33_A0112 | 28   | 27   | 18   |
| A33_A0113 | 26   | 23   | 15   |
| A33_A0114 | 19   | 19   | 11   |
| A33_A0115 | 0    | 1    | 0    |
| A33_A0116 | 2    | 1    | 1    |
| A33_A0117 | 15   | 15   | 16   |
| A33_A0118 | 31   | 36   | 24   |
| A33_A0119 | 32   | 26   | 18   |
| A33_A0120 | 6    | 8    | 32   |
| A33_A0121 | 4995 | 1182 | 1174 |
| A33_A0122 | 4    | 3    | 3    |
| A33_A0123 | 16   | 17   | 10   |
| A33_A0124 | 19   | 24   | 11   |
| A33_A0125 | 78   | 283  | 229  |
| A33_A0126 | 75   | 72   | 48   |
| A33_A0127 | 158  | 212  | 100  |
| A33_A0128 | 24   | 36   | 36   |
| A33_A0129 | 111  | 134  | 183  |
| A33_A0130 | 39   | 28   | 49   |
| A33_A0131 | 226  | 139  | 122  |
| A33_A0132 | 0    | 1    | 1    |
| A33_A0133 | 28   | 23   | 28   |

|           |     |     |     |
|-----------|-----|-----|-----|
| A33_A0134 | 9   | 10  | 7   |
| A33_A0135 | 201 | 174 | 106 |
| A33_A0136 | 15  | 18  | 18  |
| A33_A0137 | 86  | 97  | 118 |
| A33_A0138 | 656 | 621 | 156 |
| A33_A0139 | 20  | 18  | 15  |
| A33_A0140 | 243 | 254 | 145 |
| A33_A0141 | 49  | 45  | 39  |
| A33_A0142 | 154 | 143 | 85  |
| A33_A0143 | 337 | 473 | 257 |
| A33_A0144 | 45  | 54  | 46  |
| A33_A0145 | 16  | 20  | 13  |
| A33_A0146 | 2   | 4   | 2   |
| A33_A0147 | 25  | 22  | 12  |
| A33_A0148 | 11  | 16  | 10  |
| A33_A0149 | 12  | 11  | 6   |
| A33_A0150 | 32  | 15  | 12  |
| A33_A0151 | 111 | 99  | 232 |
| A33_A0152 | 8   | 8   | 10  |
| A33_A0153 | 391 | 381 | 198 |
| A33_A0154 | 63  | 57  | 46  |
| A33_A0155 | 57  | 73  | 43  |
| A33_A0156 | 1   | 0   | 1   |
| A33_A0157 | 20  | 25  | 16  |
| A33_A0158 | 0   | 0   | 1   |
| A33_A0159 | 48  | 49  | 39  |
| A33_A0160 | 6   | 9   | 8   |
| A33_A0161 | 11  | 17  | 22  |
| A33_A0162 | 274 | 38  | 72  |
| A33_A0163 | 138 | 24  | 72  |
| A33_A0164 | 87  | 17  | 28  |
| A33_A0165 | 62  | 66  | 74  |
| A33_A0166 | 13  | 6   | 8   |
| A33_A0167 | 12  | 5   | 5   |
| A33_A0168 | 19  | 17  | 29  |
| A33_A0169 | 27  | 27  | 20  |
| A33_A0170 | 38  | 32  | 22  |
| A33_A0171 | 38  | 15  | 17  |
| A33_A0172 | 6   | 7   | 3   |
| A33_A0173 | 7   | 6   | 12  |
| A33_A0174 | 80  | 63  | 101 |
| A33_A0175 | 18  | 16  | 11  |
| A33_A0176 | 6   | 4   | 4   |
| A33_A0177 | 15  | 12  | 19  |
| A33_A0178 | 63  | 68  | 62  |
| A33_A0179 | 12  | 12  | 11  |
| A33_A0180 | 36  | 33  | 15  |
| A33_A0181 | 7   | 6   | 3   |

|           |     |     |     |
|-----------|-----|-----|-----|
| A33_A0182 | 10  | 7   | 6   |
| A33_A0183 | 21  | 17  | 19  |
| A33_A0184 | 11  | 12  | 7   |
| A33_A0185 | 2   | 1   | 1   |
| A33_A0186 | 0   | 0   | 0   |
| A33_A0187 | 8   | 7   | 5   |
| A33_A0188 | 0   | 0   | 0   |
| A33_A0189 | 2   | 1   | 2   |
| A33_A0190 | 32  | 33  | 27  |
| A33_A0191 | 15  | 8   | 19  |
| A33_A0192 | 5   | 2   | 7   |
| A33_A0193 | 20  | 16  | 14  |
| A33_A0194 | 13  | 7   | 7   |
| A33_A0195 | 25  | 21  | 13  |
| A33_A0196 | 0   | 0   | 0   |
| A33_A0197 | 7   | 9   | 6   |
| A33_A0198 | 168 | 109 | 92  |
| A33_A0199 | 131 | 125 | 112 |
| A33_A0200 | 19  | 24  | 11  |
| A33_A0201 | 3   | 3   | 6   |
| A33_A0202 | 58  | 52  | 42  |
| A33_A0203 | 258 | 136 | 121 |
| A33_A0204 | 81  | 69  | 70  |
| A33_A0205 | 746 | 424 | 398 |
| A33_A0206 | 12  | 15  | 18  |
| A33_A0207 | 74  | 44  | 34  |
| A33_A0208 | 80  | 92  | 65  |
| A33_A0209 | 161 | 72  | 109 |
| A33_A0210 | 84  | 77  | 64  |
| A33_A0211 | 74  | 59  | 49  |
| A33_A0212 | 101 | 70  | 103 |
| A33_A0213 | 82  | 63  | 54  |
| A33_A0214 | 38  | 22  | 28  |
| A33_A0215 | 76  | 37  | 43  |
| A33_A0216 | 14  | 9   | 15  |
| A33_A0217 | 58  | 62  | 40  |
| A33_A0218 | 104 | 74  | 67  |
| A33_A0219 | 17  | 12  | 11  |
| A33_A0220 | 30  | 31  | 30  |
| A33_A0221 | 19  | 11  | 14  |
| A33_A0222 | 88  | 81  | 68  |
| A33_A0223 | 36  | 37  | 19  |
| A33_A0224 | 30  | 34  | 18  |
| A33_A0225 | 34  | 22  | 17  |
| A33_A0226 | 15  | 17  | 10  |
| A33_A0227 | 7   | 8   | 4   |
| A33_A0228 | 35  | 25  | 42  |
| A33_A0229 | 56  | 56  | 35  |

|           |     |     |     |
|-----------|-----|-----|-----|
| A33_A0230 | 7   | 5   | 4   |
| A33_A0231 | 3   | 3   | 2   |
| A33_A0232 | 88  | 94  | 89  |
| A33_A0233 | 26  | 12  | 17  |
| A33_A0234 | 9   | 8   | 5   |
| A33_A0235 | 11  | 9   | 6   |
| A33_A0236 | 177 | 107 | 69  |
| A33_A0237 | 45  | 62  | 32  |
| A33_A0238 | 39  | 20  | 18  |
| A33_A0239 | 4   | 6   | 4   |
| A33_A0240 | 21  | 31  | 17  |
| A33_A0241 | 17  | 19  | 20  |
| A33_A0242 | 183 | 159 | 120 |
| A33_A0243 | 8   | 4   | 4   |
| A33_A0244 | 4   | 2   | 3   |
| A33_A0245 | 1   | 0   | 0   |
| A33_A0246 | 4   | 1   | 1   |
| A33_A0247 | 259 | 118 | 82  |
| A33_A0248 | 22  | 16  | 11  |
| A33_A0249 | 137 | 98  | 67  |
| A33_A0250 | 244 | 146 | 139 |
| A33_A0251 | 0   | 0   | 0   |
| A33_A0252 | 44  | 36  | 47  |
| A33_A0253 | 201 | 231 | 407 |
| A33_A0254 | 206 | 203 | 266 |
| A33_A0255 | 41  | 51  | 32  |
| A33_A0256 | 280 | 216 | 183 |
| A33_A0257 | 620 | 359 | 663 |
| A33_A0258 | 91  | 79  | 66  |
| A33_A0259 | 45  | 53  | 36  |
| A33_A0260 | 73  | 96  | 52  |
| A33_A0261 | 93  | 73  | 67  |
| A33_A0262 | 49  | 56  | 40  |
| A33_A0263 | 83  | 109 | 68  |
| A33_A0264 | 40  | 47  | 42  |
| A33_A0265 | 182 | 120 | 129 |
| A33_A0266 | 190 | 58  | 88  |
| A33_A0267 | 276 | 89  | 164 |
| A33_A0268 | 157 | 50  | 71  |
| A33_A0269 | 92  | 29  | 57  |
| A33_A0270 | 98  | 64  | 71  |
| A33_A0271 | 247 | 67  | 153 |
| A33_A0272 | 104 | 34  | 84  |
| A33_A0273 | 174 | 35  | 112 |
| A33_A0274 | 179 | 56  | 109 |
| A33_A0275 | 140 | 37  | 53  |
| A33_A0276 | 143 | 53  | 87  |
| A33_A0277 | 125 | 42  | 34  |

|           |      |      |     |
|-----------|------|------|-----|
| A33_A0278 | 14   | 27   | 22  |
| A33_A0279 | 13   | 9    | 10  |
| A33_A0280 | 2    | 2    | 2   |
| A33_A0281 | 4    | 6    | 5   |
| A33_A0282 | 1    | 1    | 1   |
| A33_A0283 | 23   | 19   | 20  |
| A33_A0284 | 39   | 44   | 35  |
| A33_A0285 | 46   | 51   | 50  |
| A33_A0286 | 7    | 9    | 7   |
| A33_A0287 | 4    | 3    | 1   |
| A33_A0288 | 1    | 1    | 1   |
| A33_A0289 | 1    | 2    | 2   |
| A33_A0290 | 11   | 9    | 13  |
| A33_A0291 | 74   | 49   | 24  |
| A33_A0292 | 38   | 34   | 55  |
| A33_A0293 | 29   | 34   | 58  |
| A33_A0294 | 0    | 0    | 1   |
| A33_A0295 | 117  | 121  | 112 |
| A33_A0296 | 62   | 35   | 50  |
| A33_A0297 | 1193 | 1124 | 703 |
| A33_A0298 | 46   | 26   | 33  |
| A33_A0299 | 113  | 112  | 84  |
| A33_A0300 | 39   | 41   | 38  |
| A33_A0301 | 42   | 21   | 27  |
| A33_A0302 | 10   | 9    | 39  |
| A33_A0303 | 7    | 8    | 9   |
| A33_A0304 | 20   | 13   | 21  |
| A33_A0305 | 28   | 12   | 40  |
| A33_A0306 | 52   | 40   | 45  |
| A33_A0307 | 188  | 44   | 69  |
| A33_A0308 | 8    | 2    | 10  |
| A33_A0309 | 21   | 8    | 25  |
| A33_A0310 | 35   | 25   | 47  |
| A33_A0311 | 34   | 13   | 42  |
| A33_A0312 | 36   | 23   | 49  |
| A33_A0313 | 2    | 2    | 1   |
| A33_A0314 | 6    | 9    | 4   |
| A33_A0315 | 103  | 104  | 52  |
| A33_A0316 | 36   | 33   | 15  |
| A33_A0317 | 20   | 19   | 16  |
| A33_A0318 | 589  | 875  | 720 |
| A33_A0319 | 193  | 335  | 249 |
| A33_A0320 | 40   | 11   | 22  |
| A33_A0321 | 70   | 15   | 25  |
| A33_A0322 | 24   | 25   | 18  |
| A33_A0323 | 3    | 0    | 4   |
| A33_A0324 | 81   | 60   | 44  |
| A33_A0325 | 15   | 12   | 8   |

|           |       |      |      |
|-----------|-------|------|------|
| A33_A0326 | 23    | 35   | 20   |
| A33_A0327 | 9     | 10   | 6    |
| A33_A0328 | 17    | 18   | 16   |
| A33_A0329 | 19    | 18   | 9    |
| A33_A0330 | 37    | 133  | 184  |
| A33_A0331 | 10    | 9    | 14   |
| A33_A0332 | 136   | 114  | 90   |
| A33_A0333 | 5     | 2    | 2    |
| A33_A0334 | 12    | 13   | 12   |
| A33_A0335 | 27    | 22   | 42   |
| A33_A0336 | 20    | 15   | 27   |
| A33_A0337 | 79    | 50   | 113  |
| A33_A0338 | 66    | 54   | 50   |
| A33_A0339 | 236   | 320  | 484  |
| A33_A0340 | 109   | 62   | 84   |
| A33_A0341 | 34    | 66   | 21   |
| A33_A0342 | 15    | 28   | 25   |
| A33_A0343 | 29    | 32   | 35   |
| A33_A0344 | 149   | 164  | 137  |
| A33_A0345 | 11192 | 7235 | 6306 |
| A33_A0346 | 14    | 9    | 12   |
| A33_A0347 | 30    | 26   | 31   |
| A33_A0348 | 17    | 24   | 15   |
| A33_A0349 | 8     | 9    | 5    |
| A33_A0350 | 4     | 4    | 4    |
| A33_A0351 | 5     | 5    | 4    |
| A33_A0352 | 6     | 11   | 6    |
| A33_A0353 | 6     | 7    | 4    |
| A33_A0354 | 3     | 5    | 5    |
| A33_A0355 | 8     | 10   | 6    |
| A33_A0356 | 3     | 1    | 2    |
| A33_A0357 | 12    | 13   | 5    |
| A33_A0358 | 25    | 17   | 15   |
| A33_A0359 | 37    | 61   | 56   |
| A33_A0360 | 2     | 2    | 1    |
| A33_A0361 | 3     | 4    | 4    |
| A33_A0362 | 10    | 7    | 13   |
| A33_A0363 | 1862  | 1735 | 552  |
| A33_A0364 | 323   | 260  | 237  |
| A33_A0365 | 130   | 74   | 44   |
| A33_A0366 | 19    | 24   | 12   |
| A33_A0367 | 129   | 172  | 142  |
| A33_A0368 | 35    | 55   | 34   |
| A33_A0369 | 15    | 16   | 9    |
| A33_A0370 | 61    | 65   | 40   |
| A33_A0371 | 84    | 104  | 268  |
| A33_A0372 | 10    | 10   | 8    |
| A33_A0373 | 12    | 14   | 4    |

|           |     |     |     |
|-----------|-----|-----|-----|
| A33_A0374 | 11  | 24  | 8   |
| A33_A0375 | 89  | 78  | 44  |
| A33_A0376 | 20  | 23  | 12  |
| A33_A0377 | 3   | 2   | 3   |
| A33_A0378 | 1   | 2   | 1   |
| A33_A0379 | 14  | 15  | 12  |
| A33_A0380 | 33  | 34  | 26  |
| A33_A0381 | 45  | 47  | 29  |
| A33_A0382 | 89  | 100 | 74  |
| A33_A0383 | 218 | 189 | 146 |
| A33_A0384 | 21  | 17  | 10  |
| A33_A0385 | 29  | 23  | 29  |
| A33_A0386 | 59  | 70  | 64  |
| A33_A0387 | 7   | 9   | 5   |
| A33_A0388 | 64  | 83  | 104 |
| A33_A0389 | 76  | 58  | 101 |
| A33_A0390 | 165 | 106 | 119 |
| A33_A0391 | 249 | 107 | 305 |
| A33_A0392 | 126 | 66  | 252 |
| A33_A0393 | 49  | 27  | 59  |
| A33_A0394 | 53  | 21  | 95  |
| A33_A0395 | 46  | 25  | 101 |
| A33_A0396 | 36  | 21  | 86  |
| A33_A0397 | 34  | 19  | 79  |
| A33_A0398 | 31  | 20  | 76  |
| A33_A0399 | 51  | 21  | 101 |
| A33_A0400 | 36  | 17  | 75  |
| A33_A0401 | 23  | 13  | 46  |
| A33_A0402 | 55  | 29  | 90  |
| A33_A0403 | 49  | 25  | 106 |
| A33_A0404 | 61  | 41  | 116 |
| A33_A0406 | 53  | 30  | 116 |
| A33_A0407 | 51  | 44  | 35  |
| A33_A0408 | 33  | 28  | 27  |
| A33_A0409 | 19  | 15  | 13  |
| A33_A0410 | 228 | 251 | 125 |
| A33_A0411 | 13  | 8   | 5   |
| A33_A0412 | 9   | 8   | 6   |
| A33_A0413 | 10  | 7   | 12  |
| A33_A0414 | 31  | 29  | 11  |
| A33_A0415 | 13  | 12  | 10  |
| A33_A0416 | 11  | 9   | 9   |
| A33_A0417 | 26  | 23  | 15  |
| A33_A0418 | 30  | 30  | 24  |
| A33_A0419 | 56  | 55  | 30  |
| A33_A0420 | 16  | 12  | 15  |
| A33_A0421 | 29  | 18  | 16  |
| A33_A0422 | 28  | 21  | 62  |



|           |     |     |     |
|-----------|-----|-----|-----|
| A33_A0423 | 38  | 33  | 20  |
| A33_A0424 | 18  | 14  | 13  |
| A33_A0425 | 49  | 40  | 27  |
| A33_A0426 | 2   | 1   | 0   |
| A33_A0427 | 0   | 0   | 0   |
| A33_A0428 | 12  | 15  | 9   |
| A33_A0429 | 4   | 4   | 3   |
| A33_A0430 | 7   | 12  | 8   |
| A33_A0431 | 10  | 7   | 8   |
| A33_A0432 | 12  | 12  | 18  |
| A33_A0433 | 9   | 10  | 8   |
| A33_A0434 | 10  | 9   | 11  |
| A33_A0435 | 2   | 6   | 5   |
| A33_A0436 | 8   | 9   | 7   |
| A33_A0437 | 12  | 11  | 8   |
| A33_A0438 | 28  | 19  | 24  |
| A33_A0439 | 37  | 15  | 19  |
| A33_A0440 | 42  | 26  | 39  |
| A33_A0441 | 29  | 27  | 21  |
| A33_A0442 | 55  | 36  | 38  |
| A33_A0443 | 39  | 21  | 21  |
| A33_A0444 | 61  | 67  | 53  |
| A33_A0445 | 173 | 190 | 106 |
| A33_A0446 | 8   | 2   | 4   |
| A33_A0447 | 100 | 28  | 34  |
| A33_A0448 | 0   | 0   | 0   |
| A33_A0449 | 71  | 39  | 62  |
| A33_A0450 | 16  | 14  | 14  |
| A33_A0451 | 19  | 20  | 16  |
| A33_A0452 | 247 | 182 | 833 |
| A33_A0453 | 116 | 124 | 89  |
| A33_A0454 | 20  | 33  | 23  |
| A33_A0456 | 4   | 4   | 5   |
| A33_A0457 | 13  | 12  | 11  |
| A33_A0458 | 30  | 30  | 55  |
| A33_A0459 | 12  | 6   | 9   |
| A33_A0460 | 7   | 10  | 13  |
| A33_A0461 | 4   | 5   | 2   |
| A33_A0462 | 32  | 44  | 38  |
| A33_A0463 | 69  | 93  | 129 |
| A33_A0464 | 25  | 14  | 13  |
| A33_A0465 | 7   | 6   | 6   |
| A33_A0466 | 4   | 3   | 2   |
| A33_A0467 | 7   | 0   | 2   |
| A33_A0468 | 8   | 9   | 7   |
| A33_A0469 | 12  | 16  | 17  |
| A33_A0470 | 39  | 30  | 30  |
| A33_A0471 | 13  | 14  | 9   |

|           |      |     |     |
|-----------|------|-----|-----|
| A33_A0472 | 633  | 717 | 415 |
| A33_A0473 | 14   | 31  | 19  |
| A33_A0474 | 1114 | 766 | 478 |
| A33_A0475 | 0    | 1   | 1   |
| A33_A0476 | 45   | 77  | 48  |
| A33_A0477 | 100  | 82  | 56  |
| A33_A0478 | 146  | 102 | 73  |
| A33_A0479 | 63   | 59  | 29  |
| A33_A0480 | 39   | 32  | 29  |
| A33_A0481 | 5    | 6   | 5   |
| A33_A0482 | 21   | 18  | 12  |
| A33_A0483 | 25   | 23  | 16  |
| A33_A0484 | 9    | 10  | 8   |
| A33_A0485 | 53   | 38  | 39  |
| A33_A0486 | 50   | 38  | 20  |
| A33_A0487 | 14   | 21  | 9   |
| A33_A0488 | 4    | 4   | 2   |
| A33_A0489 | 47   | 32  | 38  |
| A33_A0490 | 7    | 7   | 18  |
| A33_A0491 | 48   | 46  | 25  |
| A33_A0492 | 12   | 12  | 8   |
| A33_A0493 | 56   | 32  | 29  |
| A33_A0494 | 52   | 28  | 20  |
| A33_A0495 | 95   | 76  | 60  |
| A33_A0496 | 5    | 8   | 8   |
| A33_A0497 | 14   | 4   | 53  |
| A33_A0498 | 0    | 4   | 5   |
| A33_A0499 | 13   | 23  | 15  |
| A33_A0500 | 155  | 335 | 354 |
| A33_A0501 | 5    | 6   | 5   |
| A33_A0503 | 73   | 54  | 57  |
| A33_A0504 | 72   | 47  | 33  |
| A33_A0505 | 30   | 23  | 12  |
| A33_A0506 | 52   | 41  | 32  |
| A33_A0507 | 68   | 87  | 39  |
| A33_A0508 | 62   | 89  | 21  |
| A33_A0509 | 190  | 222 | 166 |
| A33_A0510 | 24   | 51  | 65  |
| A33_A0511 | 5    | 9   | 14  |
| A33_A0512 | 5    | 7   | 8   |
| A33_A0516 | 16   | 28  | 23  |
| A33_A0517 | 12   | 13  | 11  |
| A33_A0518 | 29   | 24  | 16  |
| A33_A0519 | 22   | 22  | 21  |
| A33_A0520 | 11   | 13  | 9   |
| A33_A0521 | 18   | 23  | 48  |
| A33_A0522 | 45   | 64  | 36  |
| A33_A0523 | 12   | 12  | 9   |

|           |     |     |     |
|-----------|-----|-----|-----|
| A33_A0524 | 9   | 9   | 4   |
| A33_A0525 | 3   | 1   | 1   |
| A33_A0526 | 3   | 4   | 3   |
| A33_A0527 | 1   | 1   | 1   |
| A33_A0528 | 1   | 2   | 1   |
| A33_A0529 | 1   | 1   | 0   |
| A33_A0530 | 6   | 5   | 3   |
| A33_A0531 | 56  | 51  | 25  |
| A33_A0532 | 6   | 11  | 6   |
| A33_A0533 | 168 | 114 | 139 |
| A33_A0534 | 5   | 7   | 4   |
| A33_A0535 | 6   | 10  | 3   |
| A33_A0536 | 30  | 27  | 20  |
| A33_A0537 | 3   | 3   | 2   |
| A33_A0538 | 7   | 8   | 9   |
| A33_A0539 | 15  | 14  | 17  |
| A33_A0540 | 26  | 21  | 15  |
| A33_A0541 | 12  | 10  | 11  |
| A33_A0542 | 2   | 10  | 1   |
| A33_A0543 | 47  | 28  | 20  |
| A33_A0544 | 3   | 3   | 3   |
| A33_A0545 | 6   | 9   | 5   |
| A33_A0546 | 2   | 2   | 1   |
| A33_A0547 | 542 | 356 | 252 |
| A33_A0548 | 207 | 221 | 124 |
| A33_A0549 | 4   | 1   | 8   |
| A33_A0550 | 84  | 36  | 27  |
| A33_A0551 | 23  | 13  | 15  |
| A33_A0552 | 77  | 70  | 40  |
| A33_A0553 | 27  | 32  | 15  |
| A33_A0554 | 90  | 69  | 65  |
| A33_A0555 | 22  | 18  | 34  |
| A33_A0556 | 3   | 6   | 1   |
| A33_A0557 | 20  | 21  | 15  |
| A33_A0558 | 53  | 30  | 43  |
| A33_A0559 | 19  | 14  | 3   |
| A33_A0560 | 407 | 262 | 193 |
| A33_A0561 | 53  | 40  | 51  |
| A33_A0562 | 52  | 62  | 50  |
| A33_A0563 | 59  | 52  | 35  |
| A33_A0564 | 95  | 91  | 37  |
| A33_A0565 | 112 | 88  | 61  |
| A33_A0566 | 121 | 107 | 56  |
| A33_A0567 | 0   | 1   | 1   |
| A33_A0568 | 6   | 6   | 13  |
| A33_A0569 | 0   | 0   | 10  |
| A33_A0571 | 1   | 0   | 7   |
| A33_A0572 | 2   | 3   | 4   |

|           |      |      |      |
|-----------|------|------|------|
| A33_A0573 | 0    | 0    | 0    |
| A33_A0574 | 1    | 2    | 2    |
| A33_A0575 | 3    | 2    | 2    |
| A33_A0576 | 1    | 2    | 3    |
| A33_A0577 | 7    | 4    | 7    |
| A33_A0578 | 466  | 535  | 368  |
| A33_A0579 | 433  | 504  | 397  |
| A33_A0580 | 529  | 648  | 437  |
| A33_A0581 | 8    | 17   | 17   |
| A33_A0582 | 4    | 7    | 5    |
| A33_A0583 | 1    | 3    | 3    |
| A33_A0584 | 0    | 0    | 0    |
| A33_A0585 | 9    | 9    | 5    |
| A33_A0586 | 1    | 3    | 6    |
| A33_A0587 | 2    | 4    | 5    |
| A33_A0588 | 6    | 7    | 6    |
| A33_A0589 | 1    | 0    | 1    |
| A33_A0590 | 1    | 0    | 1    |
| A33_A0591 | 3    | 2    | 3    |
| A33_A0592 | 1    | 1    | 1    |
| A33_A0593 | 2    | 2    | 3    |
| A33_A0594 | 1    | 1    | 2    |
| A33_A0595 | 3    | 3    | 2    |
| A33_A0596 | 1    | 2    | 2    |
| A33_A0597 | 1    | 4    | 3    |
| A33_A0598 | 17   | 19   | 11   |
| A33_A0599 | 1    | 1    | 1    |
| A33_A0600 | 7    | 9    | 6    |
| A33_A0601 | 9    | 11   | 5    |
| A33_A0602 | 2    | 2    | 3    |
| A33_A0603 | 3    | 2    | 2    |
| A33_A0604 | 1    | 2    | 0    |
| A33_A0605 | 3    | 4    | 3    |
| A33_A0606 | 1    | 3    | 2    |
| A33_A0607 | 6    | 5    | 5    |
| A33_A0608 | 11   | 9    | 8    |
| A33_A0609 | 39   | 47   | 28   |
| A33_A0610 | 7    | 2    | 5    |
| A33_A0611 | 37   | 38   | 34   |
| A33_A0612 | 61   | 26   | 41   |
| A33_A0613 | 272  | 256  | 169  |
| A33_A0614 | 2865 | 2561 | 5755 |
| A33_A0615 | 360  | 329  | 502  |
| A33_A0616 | 142  | 98   | 123  |
| A33_A0617 | 12   | 15   | 23   |
| A33_A0618 | 14   | 13   | 12   |
| A33_A0619 | 89   | 62   | 48   |
| A33_A0620 | 9    | 10   | 7    |

|           |     |     |     |
|-----------|-----|-----|-----|
| A33_A0621 | 18  | 13  | 15  |
| A33_A0622 | 18  | 29  | 15  |
| A33_A0623 | 9   | 6   | 4   |
| A33_A0624 | 19  | 17  | 16  |
| A33_A0625 | 15  | 13  | 11  |
| A33_A0626 | 9   | 12  | 14  |
| A33_A0627 | 0   | 0   | 0   |
| A33_A0628 | 6   | 3   | 3   |
| A33_A0629 | 26  | 41  | 13  |
| A33_A0630 | 8   | 5   | 5   |
| A33_A0631 | 8   | 4   | 5   |
| A33_A0632 | 0   | 0   | 0   |
| A33_A0633 | 41  | 43  | 24  |
| A33_A0634 | 6   | 4   | 5   |
| A33_A0635 | 16  | 37  | 17  |
| A33_A0637 | 11  | 6   | 0   |
| A33_A0638 | 4   | 2   | 4   |
| A33_A0639 | 7   | 6   | 2   |
| A33_A0640 | 5   | 8   | 1   |
| A33_A0641 | 24  | 16  | 12  |
| A33_A0642 | 20  | 25  | 12  |
| A33_A0643 | 9   | 7   | 3   |
| A33_A0644 | 27  | 47  | 34  |
| A33_A0645 | 15  | 11  | 7   |
| A33_A0646 | 0   | 0   | 0   |
| A33_A0647 | 4   | 3   | 7   |
| A33_A0648 | 0   | 0   | 0   |
| A33_A0649 | 24  | 27  | 19  |
| A33_A0650 | 25  | 24  | 16  |
| A33_A0651 | 29  | 38  | 12  |
| A33_A0652 | 7   | 3   | 2   |
| A33_A0653 | 145 | 213 | 164 |
| A33_A0654 | 41  | 50  | 27  |
| A33_A0655 | 128 | 112 | 98  |
| A33_A0656 | 0   | 0   | 0   |
| A33_A0657 | 24  | 26  | 15  |
| A33_A0658 | 27  | 22  | 18  |
| A33_A0659 | 21  | 20  | 17  |
| A33_A0660 | 7   | 6   | 4   |
| A33_A0661 | 26  | 24  | 19  |
| A33_A0662 | 43  | 35  | 27  |
| A33_A0663 | 32  | 27  | 13  |
| A33_A0664 | 4   | 3   | 5   |
| A33_A0665 | 37  | 37  | 27  |
| A33_A0666 | 6   | 4   | 4   |
| A33_A0667 | 0   | 0   | 0   |
| A33_A0668 | 0   | 0   | 0   |
| A33_A0669 | 4   | 3   | 0   |

|           |     |     |     |
|-----------|-----|-----|-----|
| A33_A0670 | 32  | 32  | 22  |
| A33_A0671 | 0   | 4   | 0   |
| A33_A0672 | 13  | 5   | 5   |
| A33_A0673 | 47  | 56  | 34  |
| A33_A0674 | 2   | 1   | 2   |
| A33_A0675 | 20  | 11  | 12  |
| A33_A0676 | 0   | 0   | 0   |
| A33_A0677 | 0   | 0   | 0   |
| A33_A0678 | 8   | 12  | 8   |
| A33_A0679 | 27  | 20  | 14  |
| A33_A0680 | 15  | 11  | 7   |
| A33_A0681 | 9   | 8   | 6   |
| A33_A0683 | 10  | 5   | 6   |
| A33_A0685 | 12  | 20  | 11  |
| A33_A0686 | 18  | 22  | 14  |
| A33_A0687 | 0   | 1   | 0   |
| A33_A0688 | 5   | 4   | 3   |
| A33_A0689 | 22  | 18  | 14  |
| A33_A0690 | 26  | 18  | 20  |
| A33_A0691 | 0   | 0   | 0   |
| A33_A0693 | 0   | 0   | 0   |
| A33_A0695 | 37  | 43  | 19  |
| A33_A0696 | 1   | 0   | 0   |
| A33_A0697 | 0   | 0   | 0   |
| A33_A0698 | 0   | 0   | 0   |
| A33_A0700 | 0   | 3   | 5   |
| A33_A0701 | 2   | 4   | 4   |
| A33_A0702 | 16  | 17  | 13  |
| A33_A0703 | 434 | 389 | 229 |
| A33_A0704 | 307 | 259 | 206 |
| A33_A0705 | 7   | 8   | 9   |
| A33_A0706 | 10  | 8   | 7   |
| A33_A0707 | 13  | 18  | 12  |
| A33_A0708 | 12  | 14  | 11  |
| A33_A0709 | 29  | 33  | 17  |
| A33_A0710 | 1   | 1   | 2   |
| A33_A0711 | 18  | 20  | 15  |
| A33_A0712 | 9   | 10  | 12  |
| A33_A0713 | 0   | 0   | 0   |
| A33_A0714 | 3   | 0   | 1   |
| A33_A0715 | 4   | 0   | 1   |
| A33_A0716 | 18  | 17  | 12  |
| A33_A0717 | 2   | 3   | 1   |
| A33_A0718 | 66  | 92  | 76  |
| A33_A0719 | 7   | 10  | 2   |
| A33_A0720 | 1   | 2   | 1   |
| A33_A0721 | 3   | 2   | 2   |
| A33_A0722 | 29  | 34  | 19  |

|           |     |     |     |
|-----------|-----|-----|-----|
| A33_A0725 | 10  | 6   | 9   |
| A33_A0726 | 7   | 3   | 7   |
| A33_A0727 | 14  | 9   | 7   |
| A33_A0728 | 27  | 28  | 11  |
| A33_A0729 | 51  | 45  | 25  |
| A33_A0730 | 35  | 32  | 18  |
| A33_A0731 | 0   | 0   | 0   |
| A33_A0732 | 40  | 37  | 22  |
| A33_A0733 | 31  | 24  | 16  |
| A33_A0734 | 3   | 10  | 4   |
| A33_A0735 | 50  | 55  | 37  |
| A33_A0736 | 29  | 25  | 12  |
| A33_A0737 | 0   | 0   | 0   |
| A33_A0738 | 33  | 53  | 42  |
| A33_A0739 | 0   | 1   | 1   |
| A33_A0740 | 0   | 0   | 0   |
| A33_A0741 | 0   | 0   | 0   |
| A33_A0742 | 34  | 16  | 17  |
| A33_A0744 | 22  | 20  | 37  |
| A33_A0745 | 16  | 13  | 9   |
| A33_A0746 | 25  | 25  | 24  |
| A33_A0747 | 96  | 78  | 58  |
| A33_A0748 | 0   | 0   | 0   |
| A33_A0749 | 4   | 4   | 5   |
| A33_A0750 | 28  | 20  | 19  |
| A33_A0751 | 17  | 3   | 5   |
| A33_A0752 | 1   | 2   | 2   |
| A33_A0753 | 12  | 12  | 10  |
| A33_A0754 | 0   | 0   | 0   |
| A33_A0755 | 8   | 3   | 4   |
| A33_A0756 | 9   | 17  | 9   |
| A33_A0757 | 13  | 7   | 9   |
| A33_A0758 | 1   | 2   | 1   |
| A33_A0759 | 20  | 23  | 11  |
| A33_A0760 | 6   | 1   | 2   |
| A33_A0761 | 0   | 0   | 0   |
| A33_A0762 | 24  | 22  | 15  |
| A33_A0763 | 103 | 127 | 96  |
| A33_A0764 | 9   | 15  | 6   |
| A33_A0765 | 5   | 6   | 4   |
| A33_A0766 | 17  | 15  | 15  |
| A33_A0767 | 5   | 1   | 7   |
| A33_A0768 | 22  | 24  | 19  |
| A33_A0769 | 0   | 0   | 0   |
| A33_A0770 | 43  | 29  | 16  |
| A33_A0771 | 262 | 194 | 122 |
| A33_A0772 | 34  | 68  | 49  |
| A33_A0773 | 25  | 24  | 13  |

|           |     |     |     |
|-----------|-----|-----|-----|
| A33_A0774 | 11  | 9   | 7   |
| A33_A0776 | 318 | 405 | 195 |
| A33_A0777 | 271 | 376 | 237 |
| A33_A0778 | 0   | 0   | 0   |
| A33_A0779 | 9   | 9   | 2   |
| A33_A0780 | 1   | 1   | 6   |
| A33_A0781 | 6   | 13  | 7   |
| A33_A0782 | 0   | 0   | 0   |
| A33_A0783 | 3   | 3   | 2   |
| A33_A0784 | 1   | 0   | 0   |
| A33_A0785 | 160 | 140 | 79  |
| A33_A0786 | 81  | 85  | 100 |
| A33_A0787 | 12  | 9   | 11  |
| A33_A0788 | 23  | 18  | 23  |
| A33_A0789 | 8   | 10  | 8   |
| A33_A0790 | 123 | 123 | 77  |
| A33_A0791 | 116 | 124 | 100 |
| A33_A0792 | 0   | 0   | 0   |
| A33_A0793 | 14  | 8   | 5   |
| A33_A0794 | 5   | 3   | 4   |
| A33_A0795 | 9   | 13  | 6   |
| A33_A0796 | 12  | 9   | 10  |
| A33_A0797 | 7   | 9   | 9   |
| A33_A0798 | 27  | 25  | 26  |
| A33_A0799 | 274 | 235 | 181 |
| A33_A0800 | 50  | 27  | 16  |
| A33_A0801 | 5   | 4   | 5   |
| A33_A0802 | 4   | 4   | 3   |
| A33_A0803 | 65  | 67  | 50  |
| A33_A0804 | 94  | 95  | 47  |
| A33_A0805 | 6   | 7   | 3   |
| A33_A0806 | 1   | 2   | 1   |
| A33_A0807 | 12  | 11  | 6   |
| A33_A0808 | 54  | 46  | 34  |
| A33_A0809 | 290 | 171 | 196 |
| A33_A0810 | 9   | 9   | 5   |
| A33_A0811 | 20  | 0   | 1   |
| A33_A0812 | 6   | 6   | 4   |
| A33_A0813 | 31  | 30  | 50  |
| A33_A0814 | 67  | 73  | 37  |
| A33_A0815 | 34  | 35  | 50  |
| A33_A0816 | 118 | 78  | 85  |
| A33_A0817 | 3   | 3   | 2   |
| A33_A0818 | 63  | 52  | 46  |
| A33_A0819 | 41  | 23  | 32  |
| A33_A0820 | 21  | 16  | 20  |
| A33_A0821 | 58  | 69  | 50  |
| A33_A0822 | 12  | 13  | 24  |



|           |      |      |      |
|-----------|------|------|------|
| A33_A0823 | 2547 | 1181 | 2524 |
| A33_A0824 | 161  | 134  | 111  |
| A33_A0825 | 8    | 11   | 7    |
| A33_A0826 | 16   | 13   | 12   |
| A33_A0827 | 3354 | 4686 | 5490 |
| A33_A0828 | 18   | 20   | 11   |
| A33_A0829 | 6    | 8    | 4    |
| A33_A0830 | 33   | 34   | 31   |
| A33_A0831 | 24   | 18   | 9    |
| A33_A0832 | 17   | 39   | 18   |
| A33_A0833 | 40   | 37   | 27   |
| A33_A0834 | 15   | 23   | 9    |
| A33_A0835 | 54   | 50   | 29   |
| A33_A0836 | 69   | 73   | 45   |
| A33_A0837 | 123  | 94   | 58   |
| A33_A0838 | 114  | 114  | 39   |
| A33_A0839 | 44   | 37   | 22   |
| A33_A0841 | 140  | 133  | 110  |
| A33_A0842 | 209  | 212  | 205  |
| A33_A0843 | 65   | 67   | 41   |
| A33_A0844 | 80   | 79   | 52   |
| A33_A0845 | 31   | 40   | 56   |
| A33_A0846 | 0    | 0    | 0    |
| A33_A0847 | 2    | 1    | 4    |
| A33_A0848 | 227  | 260  | 242  |
| A33_A0849 | 1    | 1    | 1    |
| A33_A0850 | 0    | 1    | 1    |
| A33_A0852 | 0    | 0    | 0    |
| A33_A0853 | 0    | 1    | 0    |
| A33_A0854 | 0    | 0    | 0    |
| A33_A0855 | 168  | 174  | 91   |
| A33_A0856 | 423  | 444  | 230  |
| A33_A0857 | 128  | 140  | 69   |
| A33_A0858 | 344  | 294  | 127  |
| A33_A0859 | 84   | 71   | 52   |
| A33_A0860 | 77   | 69   | 38   |
| A33_A0861 | 12   | 14   | 20   |
| A33_A0862 | 48   | 53   | 36   |
| A33_A0863 | 36   | 30   | 17   |
| A33_A0864 | 33   | 25   | 16   |
| A33_A0865 | 0    | 2    | 0    |
| A33_A0866 | 25   | 26   | 16   |
| A33_A0867 | 52   | 33   | 29   |
| A33_A0868 | 2    | 3    | 1    |
| A33_A0869 | 18   | 10   | 6    |
| A33_A0870 | 17   | 9    | 7    |
| A33_A0871 | 23   | 23   | 15   |
| A33_A0872 | 10   | 9    | 7    |

|           |      |      |      |
|-----------|------|------|------|
| A33_A0873 | 12   | 11   | 9    |
| A33_A0874 | 26   | 23   | 24   |
| A33_A0875 | 18   | 13   | 16   |
| A33_A0876 | 23   | 12   | 15   |
| A33_A0877 | 24   | 17   | 18   |
| A33_A0878 | 54   | 40   | 19   |
| A33_A0879 | 68   | 41   | 23   |
| A33_A0880 | 2075 | 2049 | 1389 |
| A33_A0881 | 0    | 0    | 0    |
| A33_A0882 | 18   | 24   | 18   |
| A33_A0883 | 2    | 1    | 3    |
| A33_A0884 | 6    | 5    | 3    |
| A33_A0885 | 9    | 16   | 11   |
| A33_A0886 | 8    | 9    | 8    |
| A33_A0887 | 2    | 3    | 2    |
| A33_A0888 | 52   | 91   | 46   |
| A33_A0889 | 2    | 2    | 1    |
| A33_A0891 | 3    | 3    | 1    |
| A33_A0892 | 744  | 499  | 447  |
| A33_A0893 | 118  | 89   | 89   |
| A33_A0894 | 18   | 28   | 26   |
| A33_A0895 | 1    | 0    | 0    |
| A33_A0896 | 20   | 12   | 15   |
| A33_A0897 | 10   | 10   | 17   |
| A33_A0898 | 30   | 39   | 33   |
| A33_A0899 | 22   | 23   | 18   |
| A33_A0900 | 51   | 69   | 62   |
| A33_A0901 | 53   | 34   | 27   |
| A33_A0902 | 38   | 45   | 26   |
| A33_A0903 | 12   | 13   | 7    |
| A33_A0904 | 22   | 17   | 19   |
| A33_A0905 | 75   | 51   | 38   |
| A33_A0906 | 53   | 30   | 26   |
| A33_A0907 | 0    | 0    | 0    |
| A33_A0908 | 7    | 7    | 4    |
| A33_A0909 | 8    | 6    | 4    |
| A33_A0910 | 850  | 729  | 371  |
| A33_A0911 | 12   | 11   | 8    |
| A33_A0912 | 4    | 6    | 6    |
| A33_A0913 | 9    | 12   | 6    |
| A33_A0914 | 10   | 24   | 6    |
| A33_A0915 | 11   | 5    | 4    |
| A33_A0916 | 2    | 3    | 1    |
| A33_A0917 | 45   | 37   | 52   |
| A33_A0918 | 4    | 5    | 6    |
| A33_A0919 | 0    | 0    | 0    |
| A33_A0920 | 1    | 3    | 3    |
| A33_A0921 | 32   | 25   | 29   |

|           |     |     |     |
|-----------|-----|-----|-----|
| A33_A0922 | 15  | 17  | 24  |
| A33_A0923 | 24  | 23  | 35  |
| A33_A0924 | 14  | 16  | 25  |
| A33_A0925 | 40  | 47  | 54  |
| A33_A0926 | 76  | 89  | 213 |
| A33_A0927 | 58  | 39  | 31  |
| A33_A0928 | 104 | 75  | 29  |
| A33_A0929 | 5   | 4   | 4   |
| A33_A0930 | 6   | 4   | 4   |
| A33_A0931 | 2   | 3   | 2   |
| A33_A0932 | 3   | 4   | 1   |
| A33_A0933 | 3   | 1   | 2   |
| A33_A0934 | 0   | 0   | 1   |
| A33_A0935 | 38  | 29  | 31  |
| A33_A0936 | 12  | 13  | 7   |
| A33_A0937 | 20  | 21  | 17  |
| A33_A0938 | 11  | 7   | 6   |
| A33_A0939 | 14  | 9   | 8   |
| A33_A0940 | 35  | 17  | 57  |
| A33_A0941 | 29  | 20  | 20  |
| A33_A0942 | 170 | 161 | 122 |
| A33_A0943 | 55  | 45  | 52  |
| A33_A0944 | 42  | 47  | 29  |
| A33_A0945 | 5   | 6   | 3   |
| A33_A0946 | 11  | 9   | 9   |
| A33_A0947 | 31  | 17  | 13  |
| A33_A0948 | 14  | 13  | 9   |
| A33_A0949 | 0   | 0   | 2   |
| A33_A0950 | 2   | 3   | 2   |
| A33_A0951 | 7   | 5   | 4   |
| A33_A0952 | 27  | 32  | 21  |
| A33_A0953 | 13  | 14  | 8   |
| A33_A0954 | 21  | 26  | 14  |
| A33_A0955 | 15  | 12  | 9   |
| A33_A0956 | 13  | 7   | 17  |
| A33_A0957 | 3   | 3   | 3   |
| A33_A0958 | 1   | 2   | 2   |
| A33_A0959 | 8   | 4   | 3   |
| A33_A0960 | 3   | 5   | 5   |
| A33_A0961 | 67  | 28  | 24  |
| A33_A0962 | 52  | 60  | 25  |
| A33_A0963 | 28  | 33  | 19  |
| A33_A0964 | 84  | 102 | 40  |
| A33_A0965 | 90  | 82  | 23  |
| A33_A0966 | 13  | 13  | 4   |
| A33_A0967 | 33  | 44  | 15  |
| A33_A0968 | 31  | 17  | 10  |
| A33_A0969 | 637 | 362 | 155 |

|           |     |     |      |
|-----------|-----|-----|------|
| A33_A0970 | 33  | 19  | 15   |
| A33_A0971 | 47  | 26  | 15   |
| A33_A0972 | 4   | 3   | 3    |
| A33_A0973 | 4   | 5   | 3    |
| A33_A0974 | 134 | 82  | 92   |
| A33_A0975 | 30  | 22  | 20   |
| A33_A0976 | 35  | 39  | 16   |
| A33_A0977 | 27  | 9   | 9    |
| A33_A0978 | 18  | 22  | 11   |
| A33_A0979 | 0   | 0   | 0    |
| A33_A0980 | 148 | 122 | 37   |
| A33_A0981 | 15  | 8   | 15   |
| A33_A0982 | 12  | 15  | 12   |
| A33_A0983 | 17  | 18  | 14   |
| A33_A0984 | 27  | 27  | 24   |
| A33_A0985 | 14  | 46  | 9    |
| A33_A0986 | 3   | 2   | 2    |
| A33_A0987 | 2   | 3   | 2    |
| A33_A0988 | 21  | 23  | 16   |
| A33_A0989 | 25  | 33  | 21   |
| A33_A0990 | 57  | 48  | 41   |
| A33_A0991 | 19  | 17  | 9    |
| A33_A0992 | 2   | 4   | 7    |
| A33_A0993 | 3   | 2   | 4    |
| A33_A0994 | 0   | 0   | 0    |
| A33_A0995 | 95  | 79  | 780  |
| A33_A0996 | 42  | 27  | 133  |
| A33_A0997 | 53  | 54  | 28   |
| A33_A0998 | 9   | 10  | 8    |
| A33_A0999 | 33  | 19  | 22   |
| A33_A1000 | 22  | 9   | 6    |
| A33_A1001 | 160 | 102 | 78   |
| A33_A1002 | 222 | 192 | 116  |
| A33_A1003 | 15  | 14  | 14   |
| A33_A1004 | 20  | 23  | 15   |
| A33_A1005 | 21  | 16  | 12   |
| A33_A1006 | 21  | 17  | 18   |
| A33_A1007 | 6   | 7   | 5    |
| A33_A1008 | 88  | 89  | 44   |
| A33_A1009 | 66  | 69  | 32   |
| A33_A1010 | 17  | 12  | 4    |
| A33_A1011 | 459 | 213 | 3539 |
| A33_A1012 | 25  | 13  | 19   |
| A33_A1013 | 52  | 42  | 38   |
| A33_A1014 | 45  | 47  | 36   |
| A33_A1015 | 70  | 47  | 51   |
| A33_A1016 | 70  | 40  | 27   |
| A33_A1017 | 31  | 39  | 29   |

|           |     |     |     |
|-----------|-----|-----|-----|
| A33_A1018 | 27  | 21  | 19  |
| A33_A1019 | 11  | 12  | 9   |
| A33_A1020 | 8   | 17  | 3   |
| A33_A1021 | 233 | 221 | 148 |
| A33_A1022 | 24  | 15  | 18  |
| A33_A1023 | 32  | 22  | 21  |
| A33_A1024 | 34  | 33  | 22  |
| A33_A1025 | 3   | 5   | 7   |
| A33_A1026 | 0   | 1   | 0   |
| A33_A1027 | 16  | 6   | 39  |
| A33_A1028 | 5   | 8   | 11  |
| A33_A1029 | 4   | 4   | 9   |
| A33_A1030 | 17  | 13  | 10  |
| A33_A1031 | 17  | 12  | 7   |
| A33_A1032 | 39  | 32  | 27  |
| A33_A1033 | 1   | 2   | 1   |
| A33_A1034 | 2   | 0   | 0   |
| A33_A1035 | 0   | 0   | 0   |
| A33_A1036 | 1   | 0   | 1   |
| A33_A1037 | 75  | 86  | 52  |
| A33_A1038 | 71  | 58  | 49  |
| A33_A1039 | 125 | 126 | 58  |
| A33_A1040 | 167 | 154 | 90  |
| A33_A1041 | 0   | 0   | 0   |
| A33_A1042 | 29  | 29  | 31  |
| A33_A1043 | 42  | 33  | 23  |
| A33_A1044 | 17  | 10  | 8   |
| A33_A1045 | 18  | 13  | 9   |
| A33_A1046 | 34  | 36  | 25  |
| A33_A1047 | 43  | 33  | 30  |
| A33_A1048 | 16  | 19  | 19  |
| A33_A1049 | 45  | 44  | 35  |
| A33_A1050 | 158 | 135 | 95  |
| A33_A1051 | 18  | 21  | 15  |
| A33_A1052 | 27  | 16  | 20  |
| A33_A1053 | 74  | 84  | 59  |
| A33_A1054 | 30  | 19  | 26  |
| A33_A1055 | 13  | 10  | 9   |
| A33_A1056 | 1   | 2   | 2   |
| A33_A1057 | 29  | 23  | 23  |
| A33_A1058 | 9   | 9   | 5   |
| A33_A1059 | 25  | 15  | 20  |
| A33_A1060 | 17  | 12  | 16  |
| A33_A1061 | 7   | 10  | 9   |
| A33_A1062 | 67  | 82  | 32  |
| A33_A1063 | 41  | 38  | 24  |
| A33_A1064 | 14  | 31  | 10  |
| A33_A1065 | 68  | 64  | 44  |

|           |     |     |     |
|-----------|-----|-----|-----|
| A33_A1066 | 244 | 173 | 84  |
| A33_A1067 | 6   | 10  | 4   |
| A33_A1068 | 9   | 9   | 6   |
| A33_A1069 | 13  | 18  | 15  |
| A33_A1070 | 54  | 26  | 30  |
| A33_A1071 | 264 | 248 | 142 |
| A33_A1072 | 11  | 15  | 6   |
| A33_A1073 | 40  | 41  | 18  |
| A33_A1074 | 16  | 34  | 15  |
| A33_A1075 | 59  | 51  | 27  |
| A33_A1076 | 50  | 25  | 24  |
| A33_A1077 | 18  | 13  | 18  |
| A33_A1078 | 57  | 55  | 33  |
| A33_A1079 | 471 | 322 | 138 |
| A33_A1080 | 5   | 6   | 1   |
| A33_B0001 | 0   | 0   | 0   |
| A33_B0002 | 0   | 0   | 0   |
| A33_B0004 | 0   | 0   | 0   |
| A33_B0005 | 0   | 0   | 0   |
| A33_B0006 | 438 | 208 | 299 |
| A33_B0007 | 558 | 332 | 468 |
| A33_B0008 | 127 | 85  | 136 |
| A33_B0009 | 189 | 108 | 142 |
| A33_B0010 | 296 | 250 | 114 |
| A33_B0011 | 23  | 24  | 11  |
| A33_B0012 | 64  | 72  | 51  |
| A33_B0013 | 140 | 154 | 96  |
| A33_B0014 | 61  | 60  | 29  |
| A33_B0015 | 58  | 60  | 57  |
| A33_B0016 | 1   | 3   | 0   |
| A33_B0017 | 262 | 179 | 73  |
| A33_B0018 | 10  | 10  | 7   |
| A33_B0019 | 18  | 17  | 12  |
| A33_B0020 | 20  | 24  | 21  |
| A33_B0021 | 54  | 52  | 40  |
| A33_B0024 | 99  | 69  | 46  |
| A33_B0025 | 86  | 78  | 68  |
| A33_B0026 | 0   | 0   | 0   |
| A33_B0028 | 0   | 0   | 0   |
| A33_B0029 | 0   | 0   | 0   |
| A33_B0031 | 0   | 0   | 0   |
| A33_B0032 | 12  | 16  | 12  |
| A33_B0033 | 180 | 154 | 43  |
| A33_B0034 | 49  | 45  | 38  |
| A33_B0035 | 44  | 49  | 38  |
| A33_B0036 | 266 | 306 | 252 |
| A33_B0037 | 254 | 267 | 180 |
| A33_B0038 | 205 | 239 | 181 |

|           |     |     |     |
|-----------|-----|-----|-----|
| A33_B0039 | 260 | 258 | 179 |
| A33_B0040 | 262 | 249 | 251 |
| A33_B0041 | 51  | 57  | 57  |
| A33_B0042 | 51  | 55  | 57  |
| A33_B0043 | 34  | 33  | 14  |
| A33_B0044 | 96  | 83  | 48  |
| A33_B0045 | 54  | 33  | 44  |
| A33_B0046 | 24  | 19  | 29  |
| A33_B0047 | 21  | 9   | 21  |
| A33_B0048 | 19  | 11  | 18  |
| A33_B0049 | 207 | 95  | 183 |
| A33_B0050 | 491 | 458 | 439 |
| A33_B0052 | 1   | 0   | 0   |
| A33_B0053 | 0   | 0   | 0   |

---

**TABLE S3.** RPKM values (rounded to nearest integer) obtained from RNA-Seq replicate 2.

| <b>Locus tag</b> | <b>Wild type</b> | <b><math>\Delta vttR_A</math></b> | <b><math>\Delta vttR_B</math></b> |
|------------------|------------------|-----------------------------------|-----------------------------------|
| A33_0001         | 27               | 23                                | 38                                |
| A33_0002         | 0                | 0                                 | 0                                 |
| A33_0003         | 11               | 7                                 | 6                                 |
| A33_0004         | 13               | 9                                 | 10                                |
| A33_0005         | 183              | 94                                | 178                               |
| A33_0006         | 400              | 204                               | 235                               |
| A33_0007         | 7                | 7                                 | 9                                 |
| A33_0008         | 421              | 597                               | 379                               |
| A33_0009         | 207              | 134                               | 309                               |
| A33_0010         | 766              | 1007                              | 601                               |
| A33_0011         | 1253             | 1099                              | 794                               |
| A33_0012         | 674              | 560                               | 459                               |
| A33_0013         | 1113             | 870                               | 818                               |
| A33_0014         | 596              | 475                               | 561                               |
| A33_0015         | 838              | 741                               | 904                               |
| A33_0016         | 772              | 430                               | 756                               |
| A33_0017         | 1077             | 618                               | 734                               |
| A33_0018         | 3919             | 3478                              | 2977                              |
| A33_0019         | 139              | 141                               | 163                               |
| A33_0020         | 98               | 90                                | 114                               |
| A33_0021         | 26               | 27                                | 17                                |
| A33_0022         | 59               | 26                                | 27                                |
| A33_0023         | 217              | 112                               | 258                               |
| A33_0024         | 86               | 54                                | 124                               |
| A33_0025         | 166              | 76                                | 87                                |
| A33_0026         | 43               | 24                                | 37                                |
| A33_0027         | 1304             | 543                               | 735                               |
| A33_0028         | 19               | 10                                | 18                                |
| A33_0029         | 9                | 3                                 | 8                                 |
| A33_0030         | 77               | 38                                | 67                                |
| A33_0031         | 19               | 13                                | 17                                |
| A33_0032         | 136              | 82                                | 118                               |
| A33_0033         | 291              | 169                               | 210                               |
| A33_0034         | 111              | 126                               | 104                               |
| A33_0035         | 223              | 174                               | 190                               |
| A33_0036         | 53635            | 69758                             | 78292                             |
| A33_0037         | 9745             | 14805                             | 32300                             |
| A33_0038         | 293              | 793                               | 472                               |
| A33_0039         | 39               | 18                                | 42                                |
| A33_0040         | 90               | 67                                | 63                                |
| A33_0041         | 87               | 28                                | 48                                |
| A33_0042         | 6                | 4                                 | 9                                 |
| A33_0043         | 109              | 121                               | 117                               |
| A33_0044         | 9                | 9                                 | 21                                |
| A33_0045         | 2017             | 953                               | 2019                              |



|          |       |       |       |
|----------|-------|-------|-------|
| A33_0046 | 52    | 49    | 119   |
| A33_0047 | 67    | 78    | 49    |
| A33_0048 | 100   | 98    | 88    |
| A33_0049 | 114   | 90    | 78    |
| A33_0050 | 40    | 32    | 33    |
| A33_0051 | 25    | 18    | 14    |
| A33_0052 | 4     | 5     | 3     |
| A33_0053 | 11    | 13    | 19    |
| A33_0054 | 99    | 56    | 89    |
| A33_0055 | 15    | 4     | 13    |
| A33_0056 | 52    | 54    | 40    |
| A33_0057 | 111   | 100   | 139   |
| A33_0058 | 3138  | 3683  | 4894  |
| A33_0059 | 72    | 113   | 161   |
| A33_0060 | 62    | 45    | 39    |
| A33_0061 | 34    | 30    | 26    |
| A33_0062 | 21    | 19    | 16    |
| A33_0063 | 35    | 22    | 35    |
| A33_0064 | 38    | 42    | 34    |
| A33_0065 | 43    | 25    | 39    |
| A33_0066 | 332   | 305   | 445   |
| A33_0067 | 11    | 7     | 8     |
| A33_0068 | 84    | 134   | 90    |
| A33_0069 | 323   | 426   | 353   |
| A33_0070 | 157   | 204   | 153   |
| A33_0071 | 54    | 29    | 103   |
| A33_0072 | 93    | 37    | 142   |
| A33_0073 | 49    | 46    | 83    |
| A33_0074 | 56    | 54    | 89    |
| A33_0075 | 35    | 25    | 37    |
| A33_0076 | 56    | 49    | 58    |
| A33_0077 | 48    | 36    | 36    |
| A33_0078 | 0     | 0     | 0     |
| A33_0079 | 37338 | 56831 | 45900 |
| A33_0080 | 0     | 0     | 0     |
| A33_0081 | 4     | 8     | 9     |
| A33_0082 | 0     | 0     | 0     |
| A33_0083 | 0     | 0     | 0     |
| A33_0084 | 1706  | 2214  | 1425  |
| A33_0085 | 67    | 66    | 49    |
| A33_0086 | 4     | 7     | 6     |
| A33_0087 | 5     | 8     | 5     |
| A33_0088 | 3     | 3     | 5     |
| A33_0089 | 4     | 10    | 8     |
| A33_0090 | 16    | 15    | 14    |
| A33_0091 | 11    | 15    | 7     |
| A33_0092 | 95    | 50    | 80    |
| A33_0093 | 10    | 3     | 8     |

|          |     |     |      |
|----------|-----|-----|------|
| A33_0094 | 467 | 314 | 217  |
| A33_0095 | 213 | 131 | 141  |
| A33_0096 | 103 | 81  | 116  |
| A33_0097 | 22  | 20  | 15   |
| A33_0098 | 28  | 15  | 15   |
| A33_0099 | 69  | 58  | 98   |
| A33_0100 | 69  | 83  | 36   |
| A33_0101 | 401 | 746 | 281  |
| A33_0102 | 881 | 883 | 903  |
| A33_0103 | 287 | 244 | 225  |
| A33_0104 | 25  | 24  | 32   |
| A33_0105 | 40  | 23  | 24   |
| A33_0106 | 34  | 22  | 37   |
| A33_0107 | 71  | 35  | 68   |
| A33_0108 | 101 | 70  | 84   |
| A33_0109 | 133 | 108 | 70   |
| A33_0110 | 860 | 377 | 299  |
| A33_0111 | 161 | 169 | 190  |
| A33_0112 | 26  | 21  | 14   |
| A33_0113 | 18  | 19  | 20   |
| A33_0114 | 385 | 267 | 345  |
| A33_0115 | 462 | 122 | 323  |
| A33_0116 | 37  | 26  | 29   |
| A33_0117 | 24  | 20  | 25   |
| A33_0118 | 28  | 32  | 26   |
| A33_0119 | 56  | 42  | 67   |
| A33_0120 | 75  | 84  | 81   |
| A33_0121 | 125 | 84  | 117  |
| A33_0123 | 0   | 0   | 0    |
| A33_0124 | 12  | 2   | 10   |
| A33_0125 | 0   | 0   | 0    |
| A33_0126 | 210 | 159 | 216  |
| A33_0127 | 14  | 13  | 5    |
| A33_0128 | 0   | 0   | 0    |
| A33_0130 | 87  | 65  | 93   |
| A33_0131 | 954 | 788 | 1120 |
| A33_0132 | 36  | 21  | 20   |
| A33_0133 | 35  | 24  | 29   |
| A33_0134 | 54  | 32  | 48   |
| A33_0135 | 52  | 45  | 59   |
| A33_0136 | 104 | 62  | 70   |
| A33_0137 | 45  | 35  | 61   |
| A33_0138 | 103 | 112 | 75   |
| A33_0139 | 133 | 75  | 99   |
| A33_0140 | 5   | 2   | 2    |
| A33_0141 | 439 | 214 | 206  |
| A33_0142 | 196 | 159 | 157  |
| A33_0143 | 97  | 67  | 106  |

|          |      |      |      |
|----------|------|------|------|
| A33_0144 | 142  | 113  | 199  |
| A33_0145 | 180  | 192  | 178  |
| A33_0146 | 74   | 68   | 73   |
| A33_0147 | 109  | 76   | 71   |
| A33_0148 | 66   | 83   | 63   |
| A33_0149 | 30   | 28   | 31   |
| A33_0150 | 22   | 25   | 23   |
| A33_0151 | 26   | 20   | 49   |
| A33_0152 | 57   | 45   | 59   |
| A33_0153 | 60   | 55   | 67   |
| A33_0154 | 23   | 13   | 25   |
| A33_0155 | 52   | 52   | 44   |
| A33_0156 | 115  | 81   | 82   |
| A33_0157 | 39   | 10   | 29   |
| A33_0158 | 126  | 115  | 93   |
| A33_0159 | 0    | 0    | 0    |
| A33_0160 | 76   | 57   | 142  |
| A33_0161 | 87   | 78   | 87   |
| A33_0162 | 60   | 63   | 54   |
| A33_0163 | 60   | 46   | 64   |
| A33_0164 | 48   | 53   | 61   |
| A33_0165 | 114  | 93   | 53   |
| A33_0166 | 473  | 367  | 539  |
| A33_0168 | 55   | 47   | 60   |
| A33_0169 | 24   | 9    | 12   |
| A33_0170 | 81   | 17   | 43   |
| A33_0171 | 36   | 28   | 22   |
| A33_0172 | 168  | 116  | 168  |
| A33_0173 | 35   | 27   | 26   |
| A33_0174 | 0    | 0    | 0    |
| A33_0175 | 0    | 0    | 0    |
| A33_0176 | 0    | 0    | 0    |
| A33_0177 | 1    | 0    | 1    |
| A33_0178 | 0    | 0    | 0    |
| A33_0179 | 3    | 0    | 4    |
| A33_0180 | 16   | 10   | 11   |
| A33_0181 | 63   | 64   | 91   |
| A33_0182 | 201  | 203  | 505  |
| A33_0183 | 99   | 75   | 82   |
| A33_0184 | 98   | 50   | 103  |
| A33_0185 | 39   | 37   | 51   |
| A33_0186 | 28   | 17   | 36   |
| A33_0187 | 3    | 0    | 5    |
| A33_0188 | 3046 | 6413 | 2514 |
| A33_0189 | 504  | 562  | 246  |
| A33_0190 | 3    | 0    | 0    |
| A33_0191 | 1    | 0    | 6    |
| A33_0192 | 239  | 144  | 199  |

|          |      |      |      |
|----------|------|------|------|
| A33_0193 | 1049 | 702  | 942  |
| A33_0194 | 88   | 57   | 72   |
| A33_0195 | 90   | 56   | 57   |
| A33_0196 | 27   | 20   | 49   |
| A33_0197 | 176  | 146  | 239  |
| A33_0198 | 43   | 41   | 52   |
| A33_0199 | 100  | 93   | 91   |
| A33_0200 | 50   | 29   | 44   |
| A33_0201 | 33   | 24   | 36   |
| A33_0202 | 112  | 123  | 144  |
| A33_0203 | 36   | 43   | 56   |
| A33_0204 | 11   | 4    | 6    |
| A33_0205 | 2    | 0    | 0    |
| A33_0206 | 21   | 10   | 14   |
| A33_0207 | 12   | 10   | 6    |
| A33_0208 | 13   | 18   | 16   |
| A33_0209 | 25   | 25   | 23   |
| A33_0210 | 27   | 19   | 26   |
| A33_0211 | 9    | 2    | 4    |
| A33_0212 | 10   | 6    | 9    |
| A33_0213 | 9    | 9    | 5    |
| A33_0214 | 10   | 5    | 11   |
| A33_0215 | 14   | 4    | 6    |
| A33_0216 | 8    | 3    | 6    |
| A33_0217 | 13   | 16   | 15   |
| A33_0218 | 66   | 33   | 22   |
| A33_0219 | 5    | 3    | 2    |
| A33_0220 | 6    | 6    | 6    |
| A33_0221 | 28   | 15   | 37   |
| A33_0222 | 26   | 15   | 12   |
| A33_0223 | 0    | 0    | 1    |
| A33_0224 | 1    | 3    | 1    |
| A33_0225 | 153  | 64   | 217  |
| A33_0226 | 170  | 84   | 179  |
| A33_0227 | 60   | 39   | 73   |
| A33_0228 | 57   | 46   | 31   |
| A33_0229 | 31   | 22   | 28   |
| A33_0230 | 28   | 26   | 49   |
| A33_0231 | 0    | 0    | 0    |
| A33_0232 | 24   | 12   | 32   |
| A33_0233 | 64   | 118  | 94   |
| A33_0234 | 2844 | 1321 | 1817 |
| A33_0235 | 24   | 10   | 22   |
| A33_0236 | 34   | 33   | 36   |
| A33_0237 | 19   | 15   | 15   |
| A33_0238 | 44   | 18   | 33   |
| A33_0239 | 24   | 15   | 50   |
| A33_0240 | 32   | 22   | 49   |

|          |      |      |      |
|----------|------|------|------|
| A33_0241 | 49   | 37   | 63   |
| A33_0242 | 17   | 8    | 17   |
| A33_0243 | 23   | 8    | 17   |
| A33_0244 | 33   | 19   | 32   |
| A33_0245 | 25   | 11   | 17   |
| A33_0246 | 18   | 3    | 15   |
| A33_0247 | 29   | 14   | 18   |
| A33_0248 | 58   | 45   | 52   |
| A33_0249 | 64   | 43   | 43   |
| A33_0250 | 36   | 13   | 20   |
| A33_0251 | 12   | 5    | 5    |
| A33_0252 | 187  | 78   | 188  |
| A33_0253 | 81   | 48   | 82   |
| A33_0254 | 252  | 143  | 155  |
| A33_0255 | 77   | 59   | 78   |
| A33_0256 | 176  | 127  | 110  |
| A33_0257 | 123  | 87   | 61   |
| A33_0258 | 156  | 119  | 114  |
| A33_0259 | 164  | 101  | 72   |
| A33_0260 | 76   | 40   | 37   |
| A33_0261 | 136  | 101  | 96   |
| A33_0262 | 23   | 6    | 32   |
| A33_0264 | 0    | 0    | 0    |
| A33_0265 | 11   | 3    | 1    |
| A33_0266 | 4    | 0    | 0    |
| A33_0267 | 66   | 29   | 36   |
| A33_0268 | 96   | 27   | 47   |
| A33_0269 | 52   | 30   | 30   |
| A33_0270 | 73   | 54   | 61   |
| A33_0271 | 167  | 98   | 98   |
| A33_0272 | 72   | 35   | 37   |
| A33_0273 | 38   | 14   | 24   |
| A33_0274 | 70   | 37   | 46   |
| A33_0275 | 25   | 11   | 23   |
| A33_0276 | 27   | 14   | 28   |
| A33_0277 | 11   | 5    | 8    |
| A33_0278 | 46   | 16   | 18   |
| A33_0279 | 25   | 3    | 6    |
| A33_0280 | 9    | 4    | 4    |
| A33_0281 | 7393 | 2032 | 2397 |
| A33_0282 | 32   | 5    | 12   |
| A33_0283 | 22   | 5    | 8    |
| A33_0284 | 11   | 1    | 4    |
| A33_0285 | 9    | 3    | 3    |
| A33_0286 | 3    | 1    | 2    |
| A33_0287 | 7    | 1    | 2    |
| A33_0288 | 7    | 1    | 2    |
| A33_0289 | 10   | 1    | 1    |

|          |      |      |      |
|----------|------|------|------|
| A33_0290 | 2    | 1    | 0    |
| A33_0291 | 23   | 4    | 5    |
| A33_0292 | 0    | 0    | 0    |
| A33_0293 | 25   | 8    | 4    |
| A33_0294 | 8    | 5    | 5    |
| A33_0295 | 19   | 31   | 18   |
| A33_0296 | 12   | 16   | 18   |
| A33_0297 | 74   | 92   | 85   |
| A33_0298 | 148  | 141  | 181  |
| A33_0299 | 93   | 41   | 84   |
| A33_0300 | 50   | 44   | 55   |
| A33_0301 | 60   | 50   | 58   |
| A33_0302 | 49   | 22   | 34   |
| A33_0303 | 20   | 20   | 36   |
| A33_0304 | 49   | 43   | 48   |
| A33_0305 | 1012 | 630  | 1115 |
| A33_0306 | 84   | 51   | 54   |
| A33_0307 | 148  | 60   | 173  |
| A33_0308 | 131  | 45   | 168  |
| A33_0309 | 43   | 90   | 22   |
| A33_0310 | 26   | 16   | 44   |
| A33_0311 | 19   | 15   | 14   |
| A33_0312 | 0    | 0    | 0    |
| A33_0313 | 3    | 2    | 3    |
| A33_0314 | 3    | 2    | 3    |
| A33_0315 | 50   | 68   | 162  |
| A33_0316 | 0    | 0    | 0    |
| A33_0317 | 1    | 1    | 1    |
| A33_0318 | 3    | 1    | 1    |
| A33_0319 | 20   | 17   | 22   |
| A33_0320 | 6    | 7    | 7    |
| A33_0321 | 8    | 14   | 5    |
| A33_0322 | 10   | 9    | 6    |
| A33_0323 | 37   | 24   | 37   |
| A33_0324 | 33   | 20   | 22   |
| A33_0325 | 113  | 60   | 65   |
| A33_0326 | 61   | 36   | 66   |
| A33_0327 | 179  | 111  | 225  |
| A33_0328 | 315  | 154  | 466  |
| A33_0329 | 60   | 34   | 113  |
| A33_0330 | 393  | 416  | 765  |
| A33_0331 | 92   | 109  | 113  |
| A33_0332 | 124  | 116  | 196  |
| A33_0333 | 16   | 13   | 19   |
| A33_0334 | 52   | 61   | 42   |
| A33_0335 | 184  | 201  | 155  |
| A33_0336 | 295  | 364  | 378  |
| A33_0337 | 1782 | 1274 | 478  |

|          |        |        |        |
|----------|--------|--------|--------|
| A33_0338 | 172    | 48     | 94     |
| A33_0339 | 30     | 20     | 17     |
| A33_0340 | 50     | 52     | 52     |
| A33_0341 | 57     | 68     | 95     |
| A33_0343 | 33333  | 84395  | 50380  |
| A33_0344 | 0      | 0      | 0      |
| A33_0345 | 36     | 12     | 26     |
| A33_0346 | 40     | 20     | 44     |
| A33_0347 | 150    | 122    | 145    |
| A33_0348 | 78     | 57     | 61     |
| A33_0349 | 6      | 6      | 4      |
| A33_0350 | 14409  | 11336  | 11870  |
| A33_0351 | 0      | 0      | 0      |
| A33_0352 | 29     | 23     | 34     |
| A33_0353 | 816    | 735    | 1103   |
| A33_0354 | 4448   | 2511   | 2855   |
| A33_0355 | 3179   | 3662   | 2612   |
| A33_0356 | 1076   | 1082   | 704    |
| A33_0357 | 577    | 318    | 420    |
| A33_0358 | 322    | 163    | 218    |
| A33_0359 | 213    | 65     | 139    |
| A33_0360 | 1249   | 448    | 483    |
| A33_0361 | 5      | 4      | 5      |
| A33_0362 | 189    | 104    | 154    |
| A33_0363 | 69     | 72     | 80     |
| A33_0364 | 9      | 3      | 12     |
| A33_0365 | 294    | 178    | 274    |
| A33_0366 | 3      | 2      | 5      |
| A33_0367 | 252    | 195    | 208    |
| A33_0368 | 752    | 864    | 560    |
| A33_0369 | 23     | 17     | 22     |
| A33_0370 | 34     | 24     | 27     |
| A33_0371 | 35     | 14     | 25     |
| A33_0372 | 9      | 12     | 2      |
| A33_0373 | 67     | 58     | 45     |
| A33_0374 | 16     | 8      | 14     |
| A33_0375 | 14     | 10     | 8      |
| A33_0376 | 12     | 16     | 12     |
| A33_0377 | 0      | 0      | 0      |
| A33_0379 | 2      | 24     | 15     |
| A33_0380 | 0      | 0      | 0      |
| A33_0381 | 8835   | 10563  | 13570  |
| A33_0382 | 0      | 0      | 0      |
| A33_0383 | 0      | 0      | 0      |
| A33_0385 | 0      | 0      | 0      |
| A33_0386 | 0      | 0      | 0      |
| A33_0387 | 0      | 0      | 0      |
| A33_0388 | 438188 | 747520 | 467540 |

|          |      |      |      |
|----------|------|------|------|
| A33_0389 | 0    | 0    | 0    |
| A33_0390 | 25   | 17   | 19   |
| A33_0391 | 230  | 90   | 136  |
| A33_0392 | 8    | 7    | 12   |
| A33_0393 | 418  | 440  | 579  |
| A33_0394 | 25   | 17   | 17   |
| A33_0395 | 133  | 65   | 109  |
| A33_0396 | 194  | 125  | 247  |
| A33_0397 | 8    | 14   | 9    |
| A33_0398 | 277  | 167  | 466  |
| A33_0399 | 87   | 75   | 71   |
| A33_0400 | 94   | 86   | 72   |
| A33_0401 | 74   | 58   | 67   |
| A33_0402 | 80   | 73   | 94   |
| A33_0403 | 120  | 105  | 95   |
| A33_0404 | 132  | 110  | 98   |
| A33_0405 | 145  | 114  | 91   |
| A33_0406 | 87   | 71   | 69   |
| A33_0407 | 73   | 60   | 48   |
| A33_0408 | 185  | 209  | 104  |
| A33_0409 | 119  | 79   | 183  |
| A33_0410 | 397  | 174  | 300  |
| A33_0411 | 101  | 101  | 111  |
| A33_0412 | 49   | 36   | 56   |
| A33_0413 | 51   | 51   | 39   |
| A33_0414 | 58   | 50   | 48   |
| A33_0415 | 76   | 57   | 41   |
| A33_0416 | 383  | 235  | 297  |
| A33_0417 | 66   | 51   | 59   |
| A33_0418 | 101  | 57   | 48   |
| A33_0419 | 130  | 107  | 74   |
| A33_0422 | 40   | 41   | 22   |
| A33_0423 | 239  | 247  | 126  |
| A33_0424 | 80   | 71   | 77   |
| A33_0425 | 160  | 226  | 175  |
| A33_0426 | 33   | 25   | 56   |
| A33_0427 | 83   | 46   | 85   |
| A33_0428 | 35   | 32   | 32   |
| A33_0429 | 34   | 45   | 22   |
| A33_0430 | 18   | 17   | 16   |
| A33_0431 | 210  | 143  | 289  |
| A33_0432 | 266  | 152  | 154  |
| A33_0433 | 2589 | 2225 | 2990 |
| A33_0434 | 7    | 5    | 0    |
| A33_0435 | 12   | 13   | 9    |
| A33_0436 | 108  | 44   | 97   |
| A33_0437 | 283  | 139  | 370  |
| A33_0438 | 78   | 47   | 60   |



|          |      |     |      |
|----------|------|-----|------|
| A33_0439 | 18   | 19  | 10   |
| A33_0440 | 8    | 13  | 10   |
| A33_0441 | 73   | 36  | 69   |
| A33_0442 | 113  | 105 | 104  |
| A33_0443 | 93   | 74  | 123  |
| A33_0444 | 143  | 88  | 118  |
| A33_0445 | 111  | 88  | 111  |
| A33_0446 | 156  | 116 | 172  |
| A33_0447 | 75   | 52  | 85   |
| A33_0448 | 34   | 35  | 47   |
| A33_0449 | 20   | 15  | 15   |
| A33_0450 | 77   | 65  | 215  |
| A33_0451 | 30   | 26  | 72   |
| A33_0452 | 0    | 0   | 0    |
| A33_0453 | 50   | 34  | 70   |
| A33_0454 | 23   | 23  | 26   |
| A33_0455 | 39   | 32  | 27   |
| A33_0456 | 56   | 42  | 68   |
| A33_0457 | 91   | 59  | 143  |
| A33_0458 | 179  | 140 | 148  |
| A33_0459 | 82   | 61  | 93   |
| A33_0460 | 80   | 44  | 113  |
| A33_0461 | 65   | 68  | 131  |
| A33_0462 | 55   | 40  | 61   |
| A33_0463 | 102  | 105 | 74   |
| A33_0464 | 33   | 18  | 31   |
| A33_0465 | 484  | 355 | 522  |
| A33_0466 | 31   | 23  | 27   |
| A33_0467 | 92   | 93  | 105  |
| A33_0468 | 142  | 90  | 120  |
| A33_0469 | 42   | 31  | 49   |
| A33_0470 | 23   | 28  | 24   |
| A33_0471 | 3    | 5   | 4    |
| A33_0472 | 363  | 72  | 183  |
| A33_0473 | 0    | 0   | 0    |
| A33_0474 | 105  | 84  | 113  |
| A33_0475 | 51   | 33  | 48   |
| A33_0476 | 10   | 12  | 22   |
| A33_0477 | 85   | 64  | 66   |
| A33_0478 | 554  | 306 | 332  |
| A33_0479 | 1787 | 728 | 1341 |
| A33_0480 | 247  | 130 | 287  |
| A33_0481 | 18   | 8   | 19   |
| A33_0482 | 15   | 6   | 16   |
| A33_0483 | 666  | 440 | 889  |
| A33_0484 | 0    | 4   | 6    |
| A33_0485 | 311  | 212 | 279  |
| A33_0486 | 362  | 271 | 592  |

|          |      |       |      |
|----------|------|-------|------|
| A33_0487 | 587  | 435   | 726  |
| A33_0488 | 115  | 122   | 130  |
| A33_0489 | 3    | 1     | 2    |
| A33_0490 | 187  | 317   | 345  |
| A33_0491 | 733  | 327   | 354  |
| A33_0492 | 30   | 25    | 19   |
| A33_0493 | 2335 | 526   | 442  |
| A33_0494 | 2223 | 624   | 690  |
| A33_0495 | 388  | 159   | 117  |
| A33_0496 | 149  | 80    | 175  |
| A33_0497 | 83   | 80    | 103  |
| A33_0498 | 103  | 120   | 123  |
| A33_0499 | 84   | 71    | 110  |
| A33_0500 | 80   | 58    | 74   |
| A33_0501 | 44   | 22    | 40   |
| A33_0502 | 93   | 39    | 56   |
| A33_0503 | 53   | 27    | 54   |
| A33_0504 | 46   | 26    | 55   |
| A33_0505 | 113  | 62    | 80   |
| A33_0506 | 105  | 78    | 81   |
| A33_0507 | 139  | 105   | 130  |
| A33_0508 | 1107 | 874   | 683  |
| A33_0509 | 893  | 459   | 573  |
| A33_0510 | 14   | 11    | 11   |
| A33_0511 | 22   | 15    | 28   |
| A33_0512 | 44   | 34    | 43   |
| A33_0513 | 13   | 13    | 14   |
| A33_0514 | 7    | 5     | 10   |
| A33_0515 | 20   | 24    | 15   |
| A33_0516 | 119  | 62    | 124  |
| A33_0517 | 653  | 135   | 558  |
| A33_0518 | 8    | 4     | 7    |
| A33_0519 | 189  | 119   | 175  |
| A33_0520 | 166  | 61    | 24   |
| A33_0521 | 44   | 33    | 34   |
| A33_0522 | 7587 | 12122 | 6881 |
| A33_0523 | 0    | 0     | 0    |
| A33_0524 | 0    | 0     | 0    |
| A33_0525 | 0    | 0     | 0    |
| A33_0526 | 0    | 0     | 0    |
| A33_0527 | 0    | 0     | 9    |
| A33_0528 | 73   | 53    | 91   |
| A33_0529 | 79   | 64    | 115  |
| A33_0530 | 63   | 56    | 58   |
| A33_0531 | 64   | 33    | 49   |
| A33_0532 | 62   | 39    | 39   |
| A33_0533 | 45   | 43    | 37   |
| A33_0534 | 123  | 99    | 98   |

|          |      |      |      |
|----------|------|------|------|
| A33_0535 | 688  | 475  | 544  |
| A33_0536 | 141  | 97   | 110  |
| A33_0537 | 133  | 64   | 69   |
| A33_0538 | 722  | 345  | 585  |
| A33_0539 | 0    | 2    | 0    |
| A33_0540 | 117  | 73   | 228  |
| A33_0541 | 842  | 508  | 473  |
| A33_0542 | 715  | 486  | 349  |
| A33_0543 | 377  | 147  | 233  |
| A33_0544 | 42   | 25   | 34   |
| A33_0545 | 299  | 198  | 410  |
| A33_0546 | 348  | 375  | 749  |
| A33_0547 | 53   | 38   | 73   |
| A33_0548 | 337  | 172  | 474  |
| A33_0549 | 938  | 472  | 659  |
| A33_0550 | 760  | 510  | 1030 |
| A33_0551 | 801  | 534  | 590  |
| A33_0552 | 1180 | 869  | 800  |
| A33_0553 | 1000 | 587  | 428  |
| A33_0554 | 464  | 359  | 248  |
| A33_0555 | 186  | 143  | 208  |
| A33_0556 | 50   | 43   | 73   |
| A33_0557 | 78   | 83   | 77   |
| A33_0558 | 153  | 90   | 187  |
| A33_0559 | 63   | 43   | 61   |
| A33_0560 | 0    | 0    | 0    |
| A33_0561 | 1560 | 1539 | 1982 |
| A33_0562 | 121  | 66   | 106  |
| A33_0563 | 40   | 41   | 80   |
| A33_0564 | 43   | 37   | 44   |
| A33_0565 | 28   | 19   | 26   |
| A33_0566 | 41   | 24   | 13   |
| A33_0567 | 104  | 67   | 69   |
| A33_0568 | 62   | 46   | 50   |
| A33_0569 | 20   | 14   | 25   |
| A33_0570 | 89   | 70   | 104  |
| A33_0571 | 6    | 4    | 3    |
| A33_0572 | 689  | 199  | 306  |
| A33_0573 | 37   | 32   | 28   |
| A33_0574 | 14   | 11   | 7    |
| A33_0575 | 38   | 25   | 32   |
| A33_0576 | 49   | 41   | 36   |
| A33_0577 | 60   | 39   | 45   |
| A33_0578 | 1196 | 974  | 1402 |
| A33_0579 | 126  | 59   | 83   |
| A33_0580 | 1    | 2    | 9    |
| A33_0581 | 5    | 7    | 4    |
| A33_0582 | 549  | 405  | 619  |

|          |       |       |       |
|----------|-------|-------|-------|
| A33_0583 | 19    | 14    | 15    |
| A33_0584 | 57    | 53    | 47    |
| A33_0585 | 15    | 8     | 7     |
| A33_0586 | 7     | 5     | 7     |
| A33_0587 | 4     | 3     | 4     |
| A33_0588 | 4     | 3     | 5     |
| A33_0589 | 15    | 6     | 6     |
| A33_0590 | 4     | 3     | 3     |
| A33_0591 | 4     | 4     | 4     |
| A33_0592 | 2     | 2     | 2     |
| A33_0593 | 2     | 3     | 2     |
| A33_0594 | 46    | 23    | 49    |
| A33_0595 | 44    | 24    | 26    |
| A33_0596 | 29    | 17    | 12    |
| A33_0597 | 25    | 12    | 20    |
| A33_0598 | 127   | 36    | 78    |
| A33_0599 | 0     | 0     | 0     |
| A33_0600 | 328   | 226   | 220   |
| A33_0601 | 145   | 108   | 150   |
| A33_0602 | 147   | 109   | 91    |
| A33_0603 | 64    | 44    | 41    |
| A33_0604 | 127   | 56    | 96    |
| A33_0605 | 41    | 16    | 31    |
| A33_0606 | 7934  | 3240  | 7303  |
| A33_0607 | 144   | 140   | 138   |
| A33_0608 | 204   | 115   | 195   |
| A33_0609 | 218   | 180   | 188   |
| A33_0610 | 742   | 479   | 675   |
| A33_0611 | 31    | 20    | 44    |
| A33_0612 | 121   | 83    | 71    |
| A33_0613 | 1265  | 707   | 1220  |
| A33_0614 | 3546  | 4559  | 4610  |
| A33_0615 | 18568 | 25989 | 15769 |
| A33_0616 | 236   | 91    | 148   |
| A33_0619 | 227   | 146   | 173   |
| A33_0620 | 41    | 22    | 39    |
| A33_0621 | 38    | 34    | 33    |
| A33_0622 | 239   | 110   | 412   |
| A33_0623 | 295   | 132   | 260   |
| A33_0624 | 231   | 178   | 217   |
| A33_0625 | 239   | 181   | 237   |
| A33_0626 | 218   | 153   | 120   |
| A33_0627 | 7     | 4     | 6     |
| A33_0628 | 4     | 4     | 4     |
| A33_0629 | 132   | 87    | 115   |
| A33_0630 | 53    | 54    | 52    |
| A33_0631 | 85    | 74    | 44    |
| A33_0632 | 77    | 88    | 63    |

|          |      |      |      |
|----------|------|------|------|
| A33_0633 | 55   | 45   | 80   |
| A33_0634 | 56   | 33   | 32   |
| A33_0635 | 104  | 92   | 116  |
| A33_0636 | 173  | 88   | 119  |
| A33_0637 | 31   | 17   | 30   |
| A33_0638 | 9    | 2    | 9    |
| A33_0639 | 175  | 102  | 133  |
| A33_0641 | 89   | 37   | 59   |
| A33_0642 | 298  | 149  | 194  |
| A33_0643 | 0    | 0    | 8    |
| A33_0644 | 110  | 153  | 90   |
| A33_0645 | 40   | 21   | 41   |
| A33_0646 | 31   | 19   | 30   |
| A33_0647 | 30   | 17   | 58   |
| A33_0648 | 2    | 2    | 0    |
| A33_0649 | 463  | 375  | 438  |
| A33_0650 | 183  | 146  | 131  |
| A33_0651 | 203  | 175  | 140  |
| A33_0652 | 36   | 30   | 33   |
| A33_0653 | 105  | 71   | 77   |
| A33_0654 | 13   | 14   | 21   |
| A33_0655 | 32   | 19   | 29   |
| A33_0657 | 24   | 11   | 19   |
| A33_0658 | 281  | 378  | 271  |
| A33_0659 | 169  | 113  | 120  |
| A33_0660 | 67   | 53   | 63   |
| A33_0661 | 28   | 12   | 49   |
| A33_0662 | 128  | 68   | 182  |
| A33_0663 | 112  | 40   | 99   |
| A33_0664 | 112  | 66   | 134  |
| A33_0665 | 89   | 64   | 66   |
| A33_0666 | 94   | 80   | 98   |
| A33_0667 | 42   | 44   | 74   |
| A33_0668 | 62   | 26   | 62   |
| A33_0669 | 72   | 55   | 36   |
| A33_0670 | 25   | 15   | 14   |
| A33_0671 | 125  | 54   | 85   |
| A33_0672 | 135  | 89   | 145  |
| A33_0673 | 300  | 212  | 117  |
| A33_0674 | 441  | 262  | 362  |
| A33_0675 | 59   | 65   | 91   |
| A33_0676 | 271  | 277  | 211  |
| A33_0677 | 21   | 27   | 76   |
| A33_0678 | 20   | 33   | 38   |
| A33_0679 | 28   | 37   | 62   |
| A33_0680 | 42   | 28   | 42   |
| A33_0681 | 1966 | 2469 | 4163 |
| A33_0682 | 185  | 66   | 134  |

|          |      |     |      |
|----------|------|-----|------|
| A33_0683 | 10   | 4   | 8    |
| A33_0684 | 306  | 180 | 290  |
| A33_0685 | 428  | 221 | 227  |
| A33_0686 | 67   | 65  | 68   |
| A33_0687 | 4    | 0   | 2    |
| A33_0688 | 0    | 0   | 0    |
| A33_0689 | 0    | 0   | 0    |
| A33_0690 | 0    | 0   | 0    |
| A33_0691 | 0    | 0   | 0    |
| A33_0692 | 0    | 0   | 0    |
| A33_0693 | 0    | 0   | 0    |
| A33_0694 | 90   | 87  | 180  |
| A33_0695 | 269  | 270 | 488  |
| A33_0696 | 9    | 3   | 7    |
| A33_0698 | 22   | 8   | 17   |
| A33_0699 | 22   | 9   | 24   |
| A33_0700 | 62   | 48  | 61   |
| A33_0701 | 27   | 18  | 23   |
| A33_0702 | 30   | 36  | 29   |
| A33_0703 | 79   | 78  | 69   |
| A33_0704 | 42   | 46  | 65   |
| A33_0705 | 32   | 30  | 27   |
| A33_0706 | 30   | 22  | 29   |
| A33_0707 | 32   | 34  | 46   |
| A33_0708 | 66   | 55  | 72   |
| A33_0709 | 146  | 142 | 117  |
| A33_0710 | 15   | 10  | 21   |
| A33_0711 | 1098 | 451 | 1044 |
| A33_0712 | 48   | 25  | 41   |
| A33_0713 | 108  | 146 | 200  |
| A33_0714 | 186  | 220 | 497  |
| A33_0715 | 241  | 216 | 152  |
| A33_0716 | 39   | 21  | 37   |
| A33_0717 | 69   | 48  | 47   |
| A33_0718 | 185  | 80  | 62   |
| A33_0719 | 106  | 65  | 75   |
| A33_0720 | 190  | 105 | 76   |
| A33_0721 | 62   | 27  | 64   |
| A33_0722 | 30   | 18  | 23   |
| A33_0723 | 99   | 74  | 214  |
| A33_0724 | 257  | 149 | 414  |
| A33_0725 | 646  | 368 | 711  |
| A33_0726 | 850  | 603 | 605  |
| A33_0727 | 222  | 155 | 435  |
| A33_0728 | 191  | 126 | 209  |
| A33_0729 | 310  | 190 | 181  |
| A33_0730 | 364  | 224 | 200  |
| A33_0731 | 138  | 69  | 163  |

|          |     |     |     |
|----------|-----|-----|-----|
| A33_0732 | 95  | 32  | 99  |
| A33_0733 | 56  | 27  | 42  |
| A33_0734 | 171 | 57  | 126 |
| A33_0735 | 134 | 80  | 128 |
| A33_0736 | 207 | 159 | 229 |
| A33_0737 | 867 | 657 | 509 |
| A33_0738 | 266 | 166 | 190 |
| A33_0739 | 67  | 46  | 54  |
| A33_0740 | 40  | 20  | 28  |
| A33_0741 | 87  | 41  | 66  |
| A33_0742 | 28  | 21  | 19  |
| A33_0743 | 255 | 108 | 302 |
| A33_0744 | 221 | 123 | 154 |
| A33_0745 | 9   | 7   | 8   |
| A33_0746 | 1   | 3   | 3   |
| A33_0747 | 27  | 23  | 31  |
| A33_0748 | 28  | 17  | 25  |
| A33_0749 | 26  | 13  | 21  |
| A33_0750 | 137 | 79  | 111 |
| A33_0751 | 3   | 4   | 1   |
| A33_0752 | 98  | 109 | 154 |
| A33_0753 | 75  | 115 | 94  |
| A33_0754 | 28  | 34  | 31  |
| A33_0755 | 54  | 49  | 66  |
| A33_0756 | 14  | 16  | 20  |
| A33_0758 | 8   | 7   | 10  |
| A33_0759 | 527 | 277 | 557 |
| A33_0760 | 424 | 230 | 594 |
| A33_0761 | 22  | 17  | 30  |
| A33_0762 | 17  | 23  | 34  |
| A33_0763 | 97  | 115 | 59  |
| A33_0764 | 4   | 6   | 6   |
| A33_0765 | 5   | 7   | 3   |
| A33_0766 | 3   | 2   | 3   |
| A33_0767 | 4   | 1   | 1   |
| A33_0769 | 8   | 6   | 6   |
| A33_0770 | 0   | 0   | 2   |
| A33_0771 | 1   | 4   | 1   |
| A33_0772 | 10  | 11  | 12  |
| A33_0773 | 3   | 3   | 3   |
| A33_0774 | 13  | 5   | 10  |
| A33_0775 | 5   | 6   | 5   |
| A33_0776 | 104 | 42  | 183 |
| A33_0777 | 31  | 7   | 43  |
| A33_0778 | 24  | 18  | 21  |
| A33_0779 | 33  | 8   | 33  |
| A33_0780 | 77  | 29  | 45  |
| A33_0781 | 7   | 4   | 10  |

|          |        |        |        |
|----------|--------|--------|--------|
| A33_0782 | 19     | 7      | 14     |
| A33_0783 | 2933   | 62     | 948    |
| A33_0785 | 21     | 11     | 26     |
| A33_0786 | 25     | 16     | 29     |
| A33_0787 | 263492 | 314226 | 379754 |
| A33_0788 | 243    | 169    | 310    |
| A33_0789 | 51     | 26     | 55     |
| A33_0790 | 139    | 95     | 164    |
| A33_0791 | 76     | 34     | 46     |
| A33_0792 | 180    | 17     | 120    |
| A33_0793 | 69     | 51     | 67     |
| A33_0794 | 145    | 144    | 336    |
| A33_0796 | 15     | 15     | 10     |
| A33_0797 | 566    | 581    | 737    |
| A33_0798 | 101    | 68     | 81     |
| A33_0799 | 5      | 6      | 10     |
| A33_0800 | 6      | 3      | 7      |
| A33_0801 | 2      | 1      | 2      |
| A33_0802 | 6      | 1      | 2      |
| A33_0803 | 9      | 1      | 5      |
| A33_0804 | 23     | 13     | 22     |
| A33_0805 | 52     | 24     | 27     |
| A33_0806 | 210    | 153    | 276    |
| A33_0807 | 90     | 42     | 62     |
| A33_0808 | 0      | 2      | 0      |
| A33_0809 | 98     | 44     | 124    |
| A33_0810 | 83     | 108    | 97     |
| A33_0811 | 84     | 45     | 111    |
| A33_0812 | 154    | 114    | 174    |
| A33_0813 | 72     | 31     | 54     |
| A33_0814 | 14     | 4      | 13     |
| A33_0815 | 40     | 11     | 31     |
| A33_0816 | 19     | 5      | 20     |
| A33_0817 | 20     | 10     | 12     |
| A33_0818 | 34     | 25     | 48     |
| A33_0819 | 26     | 19     | 50     |
| A33_0820 | 23     | 31     | 22     |
| A33_0821 | 17     | 12     | 42     |
| A33_0822 | 17     | 17     | 16     |
| A33_0823 | 9      | 8      | 7      |
| A33_0824 | 15     | 5      | 8      |
| A33_0825 | 136    | 82     | 93     |
| A33_0826 | 58     | 40     | 56     |
| A33_0827 | 154    | 68     | 122    |
| A33_0828 | 83     | 60     | 73     |
| A33_0829 | 140    | 92     | 92     |
| A33_0830 | 21     | 13     | 15     |
| A33_0831 | 43     | 41     | 44     |



|          |     |     |     |
|----------|-----|-----|-----|
| A33_0832 | 36  | 12  | 26  |
| A33_0833 | 40  | 15  | 48  |
| A33_0834 | 35  | 13  | 34  |
| A33_0835 | 180 | 98  | 178 |
| A33_0836 | 28  | 18  | 29  |
| A33_0837 | 42  | 18  | 57  |
| A33_0838 | 18  | 9   | 23  |
| A33_0839 | 20  | 16  | 19  |
| A33_0840 | 355 | 98  | 307 |
| A33_0841 | 115 | 23  | 53  |
| A33_0842 | 152 | 16  | 77  |
| A33_0843 | 60  | 47  | 70  |
| A33_0844 | 86  | 52  | 61  |
| A33_0845 | 44  | 23  | 32  |
| A33_0846 | 11  | 6   | 4   |
| A33_0847 | 0   | 0   | 0   |
| A33_0848 | 0   | 0   | 0   |
| A33_0849 | 0   | 0   | 0   |
| A33_0850 | 0   | 0   | 0   |
| A33_0851 | 0   | 0   | 0   |
| A33_0852 | 0   | 0   | 0   |
| A33_0853 | 19  | 18  | 28  |
| A33_0854 | 43  | 41  | 35  |
| A33_0855 | 388 | 235 | 480 |
| A33_0856 | 71  | 36  | 173 |
| A33_0857 | 101 | 65  | 124 |
| A33_0858 | 37  | 32  | 46  |
| A33_0859 | 40  | 27  | 38  |
| A33_0860 | 23  | 13  | 19  |
| A33_0861 | 24  | 12  | 18  |
| A33_0862 | 41  | 13  | 21  |
| A33_0863 | 45  | 30  | 46  |
| A33_0864 | 30  | 16  | 22  |
| A33_0865 | 3   | 2   | 4   |
| A33_0866 | 37  | 18  | 31  |
| A33_0867 | 291 | 89  | 290 |
| A33_0868 | 0   | 2   | 0   |
| A33_0869 | 9   | 6   | 16  |
| A33_0870 | 272 | 185 | 365 |
| A33_0871 | 14  | 7   | 9   |
| A33_0872 | 328 | 289 | 657 |
| A33_0873 | 61  | 50  | 64  |
| A33_0874 | 61  | 65  | 81  |
| A33_0875 | 45  | 36  | 43  |
| A33_0876 | 0   | 0   | 0   |
| A33_0877 | 60  | 67  | 39  |
| A33_0878 | 37  | 77  | 38  |
| A33_0879 | 28  | 29  | 34  |

|          |      |      |      |
|----------|------|------|------|
| A33_0880 | 9    | 8    | 6    |
| A33_0881 | 511  | 251  | 837  |
| A33_0882 | 300  | 276  | 296  |
| A33_0883 | 27   | 20   | 55   |
| A33_0884 | 51   | 34   | 71   |
| A33_0885 | 25   | 19   | 20   |
| A33_0886 | 227  | 108  | 190  |
| A33_0887 | 123  | 71   | 101  |
| A33_0888 | 61   | 45   | 26   |
| A33_0889 | 35   | 23   | 21   |
| A33_0890 | 39   | 33   | 33   |
| A33_0891 | 110  | 68   | 63   |
| A33_0892 | 122  | 87   | 129  |
| A33_0893 | 197  | 137  | 116  |
| A33_0894 | 232  | 156  | 253  |
| A33_0895 | 338  | 352  | 245  |
| A33_0896 | 74   | 46   | 43   |
| A33_0897 | 1087 | 876  | 558  |
| A33_0898 | 472  | 354  | 307  |
| A33_0899 | 298  | 307  | 497  |
| A33_0900 | 71   | 18   | 54   |
| A33_0901 | 47   | 27   | 75   |
| A33_0904 | 89   | 32   | 68   |
| A33_0905 | 1777 | 1053 | 1686 |
| A33_0908 | 313  | 180  | 241  |
| A33_0909 | 29   | 16   | 18   |
| A33_0910 | 192  | 121  | 135  |
| A33_0911 | 20   | 7    | 25   |
| A33_0912 | 73   | 32   | 68   |
| A33_0913 | 86   | 35   | 97   |
| A33_0914 | 13   | 12   | 18   |
| A33_0915 | 32   | 10   | 44   |
| A33_0916 | 24   | 18   | 30   |
| A33_0917 | 35   | 16   | 43   |
| A33_0918 | 71   | 38   | 53   |
| A33_0919 | 337  | 153  | 206  |
| A33_0920 | 53   | 19   | 29   |
| A33_0921 | 37   | 17   | 44   |
| A33_0922 | 30   | 28   | 18   |
| A33_0923 | 1010 | 657  | 984  |
| A33_0924 | 126  | 65   | 112  |
| A33_0925 | 17   | 8    | 6    |
| A33_0926 | 13   | 7    | 9    |
| A33_0927 | 73   | 55   | 83   |
| A33_0928 | 73   | 37   | 55   |
| A33_0929 | 33   | 23   | 31   |
| A33_0930 | 239  | 99   | 160  |
| A33_0931 | 178  | 86   | 123  |

|          |      |      |      |
|----------|------|------|------|
| A33_0932 | 311  | 147  | 167  |
| A33_0933 | 154  | 75   | 118  |
| A33_0934 | 6    | 0    | 8    |
| A33_0935 | 213  | 184  | 142  |
| A33_0936 | 28   | 27   | 24   |
| A33_0937 | 197  | 120  | 236  |
| A33_0938 | 128  | 72   | 105  |
| A33_0939 | 150  | 86   | 123  |
| A33_0940 | 195  | 78   | 186  |
| A33_0941 | 241  | 99   | 189  |
| A33_0942 | 16   | 7    | 14   |
| A33_0943 | 57   | 37   | 29   |
| A33_0944 | 183  | 118  | 181  |
| A33_0945 | 37   | 28   | 33   |
| A33_0946 | 49   | 34   | 41   |
| A33_0947 | 27   | 29   | 32   |
| A33_0948 | 48   | 51   | 30   |
| A33_0949 | 87   | 52   | 50   |
| A33_0950 | 62   | 41   | 68   |
| A33_0951 | 83   | 57   | 64   |
| A33_0952 | 2318 | 2053 | 1799 |
| A33_0953 | 0    | 0    | 0    |
| A33_0954 | 62   | 68   | 88   |
| A33_0955 | 112  | 61   | 79   |
| A33_0956 | 59   | 38   | 62   |
| A33_0957 | 263  | 200  | 134  |
| A33_0958 | 8    | 8    | 10   |
| A33_0959 | 57   | 68   | 97   |
| A33_0960 | 93   | 118  | 118  |
| A33_0961 | 90   | 69   | 98   |
| A33_0962 | 100  | 110  | 106  |
| A33_0963 | 68   | 103  | 72   |
| A33_0964 | 212  | 275  | 196  |
| A33_0965 | 353  | 387  | 382  |
| A33_0966 | 1291 | 889  | 963  |
| A33_0967 | 3    | 3    | 2    |
| A33_0968 | 2    | 4    | 3    |
| A33_0969 | 221  | 94   | 213  |
| A33_0970 | 177  | 183  | 227  |
| A33_0971 | 52   | 29   | 47   |
| A33_0972 | 107  | 71   | 120  |
| A33_0973 | 81   | 30   | 172  |
| A33_0974 | 17   | 26   | 34   |
| A33_0975 | 9    | 7    | 10   |
| A33_0976 | 4026 | 510  | 1943 |
| A33_0977 | 85   | 55   | 84   |
| A33_0978 | 81   | 42   | 107  |
| A33_0979 | 442  | 159  | 401  |

|          |      |     |      |
|----------|------|-----|------|
| A33_0980 | 497  | 228 | 345  |
| A33_0981 | 352  | 244 | 424  |
| A33_0982 | 108  | 100 | 106  |
| A33_0983 | 140  | 84  | 51   |
| A33_0984 | 199  | 144 | 155  |
| A33_0985 | 61   | 43  | 28   |
| A33_0986 | 120  | 50  | 100  |
| A33_0987 | 153  | 96  | 102  |
| A33_0989 | 83   | 54  | 86   |
| A33_0990 | 10   | 5   | 1    |
| A33_0991 | 27   | 49  | 55   |
| A33_0992 | 39   | 16  | 18   |
| A33_0993 | 175  | 84  | 115  |
| A33_0994 | 120  | 90  | 105  |
| A33_0995 | 45   | 29  | 42   |
| A33_0996 | 19   | 15  | 12   |
| A33_0997 | 74   | 40  | 69   |
| A33_0998 | 300  | 130 | 239  |
| A33_0999 | 15   | 18  | 17   |
| A33_1000 | 94   | 153 | 66   |
| A33_1001 | 46   | 47  | 41   |
| A33_1002 | 23   | 10  | 48   |
| A33_1003 | 43   | 30  | 90   |
| A33_1004 | 72   | 42  | 136  |
| A33_1005 | 57   | 48  | 58   |
| A33_1006 | 12   | 7   | 9    |
| A33_1007 | 8    | 4   | 3    |
| A33_1008 | 42   | 49  | 35   |
| A33_1009 | 27   | 41  | 37   |
| A33_1010 | 42   | 20  | 28   |
| A33_1011 | 6    | 2   | 8    |
| A33_1012 | 28   | 9   | 9    |
| A33_1013 | 57   | 43  | 35   |
| A33_1014 | 119  | 47  | 49   |
| A33_1015 | 145  | 74  | 89   |
| A33_1016 | 108  | 56  | 31   |
| A33_1017 | 82   | 49  | 31   |
| A33_1018 | 65   | 37  | 27   |
| A33_1019 | 55   | 39  | 20   |
| A33_1020 | 118  | 81  | 65   |
| A33_1021 | 13   | 10  | 10   |
| A33_1022 | 48   | 16  | 26   |
| A33_1023 | 1880 | 730 | 1475 |
| A33_1024 | 106  | 56  | 55   |
| A33_1025 | 243  | 167 | 122  |
| A33_1026 | 220  | 138 | 137  |
| A33_1027 | 229  | 187 | 133  |
| A33_1028 | 16   | 13  | 32   |

|          |       |       |       |
|----------|-------|-------|-------|
| A33_1029 | 87    | 44    | 60    |
| A33_1030 | 64    | 34    | 49    |
| A33_1031 | 1038  | 728   | 706   |
| A33_1032 | 17    | 17    | 10    |
| A33_1033 | 393   | 254   | 642   |
| A33_1034 | 190   | 115   | 166   |
| A33_1035 | 333   | 248   | 313   |
| A33_1036 | 23    | 23    | 17    |
| A33_1037 | 4     | 3     | 3     |
| A33_1038 | 42    | 28    | 63    |
| A33_1039 | 150   | 94    | 229   |
| A33_1040 | 115   | 70    | 85    |
| A33_1041 | 281   | 138   | 431   |
| A33_1042 | 116   | 181   | 197   |
| A33_1043 | 168   | 127   | 242   |
| A33_1044 | 98    | 91    | 110   |
| A33_1045 | 62    | 84    | 72    |
| A33_1046 | 97    | 91    | 127   |
| A33_1047 | 20086 | 19824 | 19435 |
| A33_1048 | 0     | 0     | 0     |
| A33_1050 | 67    | 24    | 47    |
| A33_1051 | 57    | 16    | 32    |
| A33_1052 | 68    | 31    | 49    |
| A33_1053 | 60    | 38    | 56    |
| A33_1054 | 84    | 50    | 42    |
| A33_1055 | 21    | 12    | 28    |
| A33_1056 | 92    | 71    | 61    |
| A33_1057 | 99    | 80    | 57    |
| A33_1058 | 236   | 84    | 190   |
| A33_1059 | 75    | 58    | 137   |
| A33_1060 | 159   | 126   | 164   |
| A33_1061 | 13    | 4     | 9     |
| A33_1062 | 1043  | 477   | 973   |
| A33_1063 | 12    | 10    | 8     |
| A33_1064 | 18    | 44    | 73    |
| A33_1065 | 23    | 18    | 37    |
| A33_1066 | 21    | 17    | 29    |
| A33_1067 | 32    | 20    | 26    |
| A33_1068 | 39    | 31    | 24    |
| A33_1069 | 42    | 46    | 33    |
| A33_1070 | 36    | 32    | 37    |
| A33_1071 | 40    | 32    | 42    |
| A33_1072 | 33    | 40    | 40    |
| A33_1073 | 26    | 14    | 24    |
| A33_1074 | 559   | 311   | 666   |
| A33_1075 | 858   | 764   | 3460  |
| A33_1076 | 325   | 278   | 252   |
| A33_1077 | 408   | 327   | 371   |

|          |     |     |     |
|----------|-----|-----|-----|
| A33_1078 | 41  | 31  | 38  |
| A33_1079 | 195 | 183 | 484 |
| A33_1080 | 31  | 61  | 22  |
| A33_1081 | 194 | 140 | 171 |
| A33_1082 | 40  | 27  | 31  |
| A33_1083 | 123 | 76  | 138 |
| A33_1084 | 26  | 19  | 28  |
| A33_1085 | 306 | 204 | 142 |
| A33_1086 | 314 | 82  | 140 |
| A33_1087 | 160 | 100 | 170 |
| A33_1088 | 55  | 91  | 79  |
| A33_1089 | 34  | 46  | 36  |
| A33_1090 | 183 | 102 | 157 |
| A33_1091 | 123 | 67  | 165 |
| A33_1092 | 77  | 50  | 66  |
| A33_1093 | 90  | 44  | 70  |
| A33_1094 | 37  | 13  | 59  |
| A33_1095 | 8   | 4   | 11  |
| A33_1096 | 14  | 10  | 15  |
| A33_1097 | 9   | 7   | 12  |
| A33_1098 | 320 | 109 | 241 |
| A33_1099 | 20  | 15  | 18  |
| A33_1102 | 76  | 55  | 94  |
| A33_1103 | 52  | 35  | 70  |
| A33_1104 | 35  | 30  | 48  |
| A33_1105 | 51  | 53  | 49  |
| A33_1106 | 2   | 3   | 7   |
| A33_1107 | 5   | 4   | 3   |
| A33_1108 | 68  | 45  | 53  |
| A33_1109 | 193 | 130 | 146 |
| A33_1110 | 256 | 129 | 206 |
| A33_1111 | 103 | 93  | 89  |
| A33_1112 | 134 | 106 | 97  |
| A33_1113 | 139 | 118 | 211 |
| A33_1114 | 545 | 336 | 516 |
| A33_1115 | 566 | 529 | 516 |
| A33_1116 | 11  | 10  | 10  |
| A33_1117 | 73  | 65  | 74  |
| A33_1118 | 7   | 12  | 17  |
| A33_1119 | 115 | 39  | 112 |
| A33_1120 | 46  | 117 | 56  |
| A33_1121 | 258 | 69  | 347 |
| A33_1122 | 321 | 13  | 175 |
| A33_1123 | 73  | 14  | 39  |
| A33_1124 | 17  | 20  | 29  |
| A33_1125 | 28  | 11  | 36  |
| A33_1126 | 31  | 13  | 32  |
| A33_1127 | 61  | 34  | 64  |

|          |       |       |       |
|----------|-------|-------|-------|
| A33_1128 | 75    | 59    | 65    |
| A33_1129 | 47    | 35    | 33    |
| A33_1130 | 129   | 56    | 99    |
| A33_1131 | 229   | 158   | 584   |
| A33_1132 | 48    | 24    | 53    |
| A33_1133 | 49    | 20    | 68    |
| A33_1134 | 22    | 13    | 26    |
| A33_1135 | 22    | 9     | 16    |
| A33_1136 | 37    | 31    | 42    |
| A33_1137 | 90    | 111   | 57    |
| A33_1138 | 708   | 642   | 456   |
| A33_1140 | 689   | 302   | 383   |
| A33_1141 | 44    | 28    | 39    |
| A33_1142 | 12    | 6     | 8     |
| A33_1143 | 20    | 18    | 18    |
| A33_1144 | 565   | 235   | 470   |
| A33_1145 | 104   | 77    | 72    |
| A33_1146 | 81    | 57    | 64    |
| A33_1147 | 2537  | 1752  | 2439  |
| A33_1149 | 0     | 0     | 4     |
| A33_1150 | 19010 | 27984 | 23068 |
| A33_1151 | 0     | 0     | 0     |
| A33_1152 | 67    | 100   | 60    |
| A33_1153 | 11    | 11    | 16    |
| A33_1154 | 335   | 552   | 145   |
| A33_1155 | 124   | 68    | 97    |
| A33_1158 | 312   | 162   | 220   |
| A33_1160 | 182   | 217   | 285   |
| A33_1161 | 109   | 50    | 41    |
| A33_1162 | 72    | 48    | 83    |
| A33_1163 | 80    | 21    | 84    |
| A33_1164 | 13    | 6     | 10    |
| A33_1165 | 101   | 60    | 45    |
| A33_1166 | 35    | 28    | 31    |
| A33_1167 | 38    | 18    | 40    |
| A33_1168 | 62    | 22    | 51    |
| A33_1169 | 9     | 4     | 12    |
| A33_1170 | 32    | 22    | 15    |
| A33_1171 | 7     | 0     | 0     |
| A33_1172 | 24    | 6     | 12    |
| A33_1173 | 22    | 8     | 10    |
| A33_1174 | 18    | 16    | 11    |
| A33_1175 | 31    | 15    | 18    |
| A33_1176 | 250   | 229   | 182   |
| A33_1177 | 19    | 15    | 10    |
| A33_1178 | 44    | 39    | 28    |
| A33_1179 | 65    | 21    | 52    |
| A33_1180 | 2040  | 1288  | 1545  |

|          |     |      |     |
|----------|-----|------|-----|
| A33_1181 | 160 | 60   | 67  |
| A33_1182 | 748 | 1020 | 378 |
| A33_1183 | 33  | 11   | 28  |
| A33_1184 | 92  | 59   | 54  |
| A33_1185 | 432 | 1401 | 672 |
| A33_1186 | 361 | 758  | 383 |
| A33_1187 | 100 | 290  | 144 |
| A33_1188 | 437 | 455  | 314 |
| A33_1189 | 146 | 180  | 163 |
| A33_1190 | 130 | 78   | 117 |
| A33_1191 | 762 | 565  | 496 |
| A33_1192 | 41  | 24   | 45  |
| A33_1193 | 20  | 15   | 28  |
| A33_1194 | 28  | 26   | 31  |
| A33_1195 | 648 | 492  | 608 |
| A33_1196 | 137 | 81   | 145 |
| A33_1197 | 255 | 170  | 359 |
| A33_1198 | 128 | 103  | 101 |
| A33_1199 | 197 | 153  | 107 |
| A33_1200 | 74  | 74   | 62  |
| A33_1201 | 149 | 151  | 183 |
| A33_1202 | 290 | 322  | 515 |
| A33_1203 | 36  | 20   | 19  |
| A33_1204 | 325 | 260  | 477 |
| A33_1205 | 7   | 8    | 21  |
| A33_1206 | 4   | 3    | 5   |
| A33_1207 | 14  | 9    | 17  |
| A33_1208 | 32  | 29   | 22  |
| A33_1209 | 42  | 37   | 39  |
| A33_1210 | 44  | 50   | 59  |
| A33_1211 | 79  | 57   | 84  |
| A33_1212 | 50  | 14   | 29  |
| A33_1213 | 16  | 10   | 15  |
| A33_1214 | 56  | 32   | 23  |
| A33_1215 | 21  | 14   | 15  |
| A33_1216 | 21  | 3    | 13  |
| A33_1217 | 39  | 44   | 27  |
| A33_1218 | 38  | 29   | 36  |
| A33_1219 | 58  | 55   | 66  |
| A33_1220 | 32  | 42   | 28  |
| A33_1221 | 73  | 61   | 64  |
| A33_1222 | 50  | 27   | 33  |
| A33_1223 | 46  | 33   | 30  |
| A33_1224 | 106 | 72   | 109 |
| A33_1225 | 189 | 100  | 243 |
| A33_1227 | 2   | 3    | 2   |
| A33_1228 | 13  | 14   | 10  |
| A33_1229 | 351 | 129  | 271 |



|          |      |     |     |
|----------|------|-----|-----|
| A33_1230 | 156  | 67  | 57  |
| A33_1232 | 16   | 7   | 18  |
| A33_1233 | 60   | 24  | 28  |
| A33_1234 | 61   | 34  | 45  |
| A33_1235 | 44   | 41  | 58  |
| A33_1236 | 39   | 21  | 43  |
| A33_1237 | 394  | 453 | 562 |
| A33_1238 | 26   | 35  | 37  |
| A33_1239 | 53   | 26  | 34  |
| A33_1240 | 64   | 76  | 61  |
| A33_1241 | 81   | 46  | 54  |
| A33_1242 | 84   | 55  | 51  |
| A33_1243 | 58   | 42  | 50  |
| A33_1244 | 22   | 18  | 26  |
| A33_1245 | 30   | 13  | 10  |
| A33_1246 | 36   | 11  | 25  |
| A33_1247 | 73   | 95  | 25  |
| A33_1248 | 44   | 37  | 17  |
| A33_1249 | 110  | 130 | 63  |
| A33_1250 | 3    | 0   | 2   |
| A33_1251 | 41   | 5   | 27  |
| A33_1252 | 8    | 8   | 6   |
| A33_1253 | 40   | 42  | 44  |
| A33_1254 | 174  | 129 | 99  |
| A33_1255 | 49   | 32  | 55  |
| A33_1256 | 77   | 49  | 33  |
| A33_1257 | 82   | 77  | 76  |
| A33_1258 | 0    | 0   | 2   |
| A33_1259 | 13   | 5   | 8   |
| A33_1260 | 8    | 13  | 10  |
| A33_1261 | 7    | 6   | 6   |
| A33_1262 | 61   | 30  | 80  |
| A33_1263 | 76   | 50  | 103 |
| A33_1264 | 62   | 57  | 49  |
| A33_1265 | 6    | 0   | 2   |
| A33_1266 | 3    | 2   | 2   |
| A33_1267 | 31   | 25  | 19  |
| A33_1268 | 50   | 37  | 10  |
| A33_1269 | 1466 | 760 | 272 |
| A33_1270 | 10   | 3   | 13  |
| A33_1271 | 27   | 9   | 39  |
| A33_1272 | 32   | 20  | 31  |
| A33_1273 | 15   | 8   | 12  |
| A33_1274 | 15   | 8   | 8   |
| A33_1275 | 22   | 14  | 26  |
| A33_1276 | 185  | 102 | 127 |
| A33_1277 | 122  | 74  | 94  |
| A33_1278 | 9    | 17  | 5   |

|          |      |      |      |
|----------|------|------|------|
| A33_1279 | 4457 | 1161 | 2908 |
| A33_1280 | 2850 | 1156 | 1236 |
| A33_1281 | 1790 | 1004 | 904  |
| A33_1282 | 31   | 19   | 24   |
| A33_1283 | 1011 | 435  | 511  |
| A33_1284 | 99   | 84   | 79   |
| A33_1285 | 1023 | 601  | 899  |
| A33_1286 | 36   | 16   | 20   |
| A33_1287 | 26   | 12   | 15   |
| A33_1288 | 35   | 48   | 58   |
| A33_1289 | 105  | 75   | 189  |
| A33_1290 | 1721 | 997  | 973  |
| A33_1291 | 63   | 26   | 32   |
| A33_1292 | 41   | 32   | 19   |
| A33_1293 | 62   | 37   | 22   |
| A33_1294 | 31   | 18   | 23   |
| A33_1295 | 282  | 140  | 206  |
| A33_1296 | 126  | 116  | 127  |
| A33_1297 | 58   | 38   | 95   |
| A33_1298 | 24   | 14   | 21   |
| A33_1299 | 15   | 12   | 21   |
| A33_1300 | 41   | 16   | 24   |
| A33_1301 | 1281 | 236  | 1445 |
| A33_1302 | 71   | 21   | 29   |
| A33_1303 | 59   | 22   | 25   |
| A33_1304 | 5    | 5    | 6    |
| A33_1305 | 31   | 11   | 19   |
| A33_1306 | 14   | 13   | 7    |
| A33_1307 | 9    | 6    | 10   |
| A33_1308 | 8    | 8    | 9    |
| A33_1309 | 34   | 29   | 27   |
| A33_1310 | 24   | 12   | 10   |
| A33_1311 | 986  | 400  | 265  |
| A33_1312 | 41   | 50   | 51   |
| A33_1313 | 191  | 204  | 167  |
| A33_1314 | 0    | 0    | 0    |
| A33_1315 | 76   | 43   | 51   |
| A33_1316 | 235  | 136  | 174  |
| A33_1317 | 10   | 11   | 5    |
| A33_1318 | 2    | 1    | 6    |
| A33_1319 | 7    | 2    | 7    |
| A33_1320 | 18   | 14   | 13   |
| A33_1321 | 35   | 26   | 22   |
| A33_1322 | 38   | 7    | 24   |
| A33_1323 | 37   | 20   | 26   |
| A33_1324 | 39   | 26   | 40   |
| A33_1325 | 50   | 22   | 35   |
| A33_1326 | 36   | 21   | 13   |

|          |     |     |     |
|----------|-----|-----|-----|
| A33_1327 | 40  | 17  | 13  |
| A33_1328 | 24  | 6   | 8   |
| A33_1329 | 40  | 23  | 16  |
| A33_1330 | 40  | 17  | 21  |
| A33_1331 | 38  | 25  | 16  |
| A33_1332 | 49  | 24  | 32  |
| A33_1333 | 58  | 30  | 35  |
| A33_1334 | 104 | 82  | 60  |
| A33_1335 | 37  | 20  | 25  |
| A33_1336 | 17  | 12  | 24  |
| A33_1337 | 8   | 8   | 8   |
| A33_1338 | 11  | 14  | 15  |
| A33_1339 | 18  | 20  | 16  |
| A33_1340 | 11  | 6   | 8   |
| A33_1341 | 209 | 104 | 275 |
| A33_1342 | 0   | 2   | 0   |
| A33_1343 | 992 | 181 | 60  |
| A33_1344 | 20  | 7   | 5   |
| A33_1345 | 35  | 10  | 6   |
| A33_1346 | 53  | 15  | 15  |
| A33_1347 | 96  | 29  | 41  |
| A33_1348 | 69  | 19  | 51  |
| A33_1349 | 20  | 11  | 20  |
| A33_1350 | 55  | 38  | 68  |
| A33_1351 | 132 | 171 | 173 |
| A33_1352 | 256 | 95  | 272 |
| A33_1353 | 404 | 160 | 420 |
| A33_1354 | 170 | 171 | 123 |
| A33_1355 | 69  | 56  | 47  |
| A33_1356 | 71  | 20  | 72  |
| A33_1357 | 31  | 26  | 34  |
| A33_1358 | 55  | 46  | 63  |
| A33_1359 | 64  | 65  | 65  |
| A33_1360 | 11  | 9   | 18  |
| A33_1361 | 254 | 233 | 363 |
| A33_1362 | 553 | 257 | 787 |
| A33_1363 | 54  | 48  | 41  |
| A33_1364 | 109 | 81  | 66  |
| A33_1365 | 74  | 41  | 31  |
| A33_1366 | 96  | 54  | 68  |
| A33_1367 | 803 | 553 | 473 |
| A33_1368 | 462 | 313 | 234 |
| A33_1369 | 873 | 661 | 602 |
| A33_1370 | 690 | 459 | 547 |
| A33_1371 | 46  | 34  | 60  |
| A33_1372 | 85  | 43  | 46  |
| A33_1373 | 43  | 34  | 28  |
| A33_1374 | 4   | 6   | 3   |

|          |     |     |     |
|----------|-----|-----|-----|
| A33_1375 | 1   | 1   | 0   |
| A33_1376 | 1   | 1   | 1   |
| A33_1377 | 5   | 13  | 7   |
| A33_1378 | 2   | 1   | 1   |
| A33_1379 | 32  | 29  | 24  |
| A33_1380 | 163 | 226 | 388 |
| A33_1381 | 2   | 1   | 1   |
| A33_1382 | 4   | 1   | 0   |
| A33_1383 | 0   | 1   | 0   |
| A33_1384 | 1   | 2   | 1   |
| A33_1385 | 65  | 35  | 17  |
| A33_1387 | 3   | 2   | 0   |
| A33_1388 | 1   | 1   | 1   |
| A33_1389 | 0   | 3   | 2   |
| A33_1390 | 5   | 7   | 1   |
| A33_1391 | 0   | 0   | 0   |
| A33_1392 | 323 | 104 | 162 |
| A33_1393 | 15  | 25  | 35  |
| A33_1394 | 240 | 145 | 242 |
| A33_1395 | 119 | 127 | 96  |
| A33_1396 | 35  | 21  | 18  |
| A33_1397 | 125 | 119 | 111 |
| A33_1398 | 93  | 71  | 56  |
| A33_1399 | 34  | 25  | 23  |
| A33_1400 | 30  | 21  | 14  |
| A33_1401 | 58  | 26  | 32  |
| A33_1402 | 0   | 9   | 3   |
| A33_1403 | 339 | 20  | 206 |
| A33_1404 | 28  | 18  | 27  |
| A33_1405 | 448 | 224 | 318 |
| A33_1406 | 6   | 12  | 17  |
| A33_1407 | 177 | 122 | 175 |
| A33_1408 | 12  | 13  | 12  |
| A33_1409 | 339 | 224 | 292 |
| A33_1412 | 19  | 15  | 11  |
| A33_1413 | 39  | 23  | 19  |
| A33_1415 | 22  | 11  | 15  |
| A33_1416 | 356 | 249 | 272 |
| A33_1417 | 180 | 88  | 83  |
| A33_1418 | 89  | 49  | 91  |
| A33_1419 | 73  | 23  | 36  |
| A33_1420 | 125 | 85  | 98  |
| A33_1421 | 483 | 475 | 669 |
| A33_1422 | 420 | 535 | 303 |
| A33_1423 | 366 | 387 | 270 |
| A33_1424 | 489 | 736 | 601 |
| A33_1425 | 756 | 846 | 743 |
| A33_1426 | 373 | 401 | 418 |

|          |      |      |     |
|----------|------|------|-----|
| A33_1427 | 1595 | 1388 | 881 |
| A33_1428 | 699  | 581  | 770 |
| A33_1429 | 271  | 276  | 240 |
| A33_1430 | 215  | 157  | 281 |
| A33_1431 | 269  | 178  | 166 |
| A33_1432 | 30   | 9    | 20  |
| A33_1433 | 0    | 0    | 0   |
| A33_1434 | 19   | 20   | 16  |
| A33_1435 | 18   | 15   | 13  |
| A33_1436 | 395  | 203  | 491 |
| A33_1437 | 137  | 100  | 91  |
| A33_1438 | 121  | 100  | 73  |
| A33_1439 | 88   | 70   | 57  |
| A33_1440 | 135  | 102  | 70  |
| A33_1441 | 204  | 122  | 78  |
| A33_1442 | 47   | 49   | 18  |
| A33_1443 | 4    | 4    | 1   |
| A33_1444 | 80   | 56   | 69  |
| A33_1445 | 4    | 7    | 4   |
| A33_1446 | 64   | 53   | 52  |
| A33_1447 | 415  | 311  | 298 |
| A33_1448 | 134  | 121  | 125 |
| A33_1449 | 221  | 330  | 481 |
| A33_1450 | 33   | 16   | 29  |
| A33_1451 | 6    | 2    | 5   |
| A33_1452 | 0    | 1    | 1   |
| A33_1453 | 77   | 86   | 63  |
| A33_1454 | 149  | 120  | 82  |
| A33_1455 | 86   | 113  | 74  |
| A33_1456 | 41   | 50   | 36  |
| A33_1457 | 52   | 43   | 52  |
| A33_1458 | 45   | 38   | 61  |
| A33_1459 | 1    | 2    | 1   |
| A33_1460 | 2    | 1    | 1   |
| A33_1461 | 0    | 0    | 1   |
| A33_1462 | 1    | 1    | 1   |
| A33_1463 | 13   | 8    | 9   |
| A33_1464 | 25   | 14   | 49  |
| A33_1465 | 108  | 108  | 87  |
| A33_1466 | 141  | 111  | 85  |
| A33_1467 | 0    | 0    | 0   |
| A33_1468 | 10   | 2    | 7   |
| A33_1469 | 26   | 19   | 27  |
| A33_1470 | 461  | 460  | 240 |
| A33_1471 | 7    | 4    | 8   |
| A33_1472 | 8    | 6    | 6   |
| A33_1473 | 4    | 2    | 5   |
| A33_1474 | 8    | 4    | 3   |

|          |       |       |       |
|----------|-------|-------|-------|
| A33_1475 | 7     | 9     | 3     |
| A33_1476 | 6     | 9     | 8     |
| A33_1477 | 3     | 4     | 4     |
| A33_1478 | 8     | 13    | 8     |
| A33_1479 | 16    | 9     | 15    |
| A33_1480 | 11    | 10    | 18    |
| A33_1481 | 20    | 17    | 33    |
| A33_1482 | 6     | 1     | 10    |
| A33_1483 | 16    | 16    | 21    |
| A33_1484 | 5     | 2     | 8     |
| A33_1485 | 13    | 8     | 5     |
| A33_1486 | 9     | 2     | 3     |
| A33_1487 | 5     | 3     | 7     |
| A33_1488 | 14    | 14    | 9     |
| A33_1489 | 1     | 1     | 0     |
| A33_1490 | 3     | 3     | 1     |
| A33_1491 | 28    | 32    | 16    |
| A33_1492 | 3     | 16    | 8     |
| A33_1493 | 7     | 8     | 5     |
| A33_1494 | 25    | 42    | 34    |
| A33_1495 | 0     | 0     | 1     |
| A33_1496 | 1     | 4     | 3     |
| A33_1497 | 12    | 13    | 9     |
| A33_1498 | 12    | 11    | 9     |
| A33_1499 | 9     | 3     | 8     |
| A33_1500 | 11    | 10    | 6     |
| A33_1501 | 2     | 0     | 3     |
| A33_1502 | 4873  | 7486  | 6061  |
| A33_1503 | 17755 | 22297 | 18042 |
| A33_1504 | 49    | 39    | 43    |
| A33_1505 | 103   | 64    | 58    |
| A33_1506 | 78    | 43    | 51    |
| A33_1507 | 256   | 147   | 115   |
| A33_1508 | 99    | 57    | 74    |
| A33_1509 | 111   | 109   | 80    |
| A33_1510 | 76    | 69    | 55    |
| A33_1511 | 29    | 17    | 30    |
| A33_1512 | 20    | 25    | 27    |
| A33_1513 | 20    | 6     | 7     |
| A33_1514 | 19    | 21    | 8     |
| A33_1515 | 58    | 50    | 59    |
| A33_1516 | 22    | 7     | 19    |
| A33_1517 | 19    | 10    | 12    |
| A33_1518 | 30    | 38    | 21    |
| A33_1519 | 12    | 14    | 13    |
| A33_1520 | 8     | 14    | 13    |
| A33_1521 | 2     | 2     | 2     |
| A33_1522 | 26    | 16    | 9     |

|          |     |     |     |
|----------|-----|-----|-----|
| A33_1523 | 714 | 920 | 477 |
| A33_1524 | 104 | 120 | 108 |
| A33_1525 | 125 | 76  | 98  |
| A33_1527 | 72  | 75  | 195 |
| A33_1528 | 184 | 256 | 293 |
| A33_1529 | 38  | 14  | 27  |
| A33_1530 | 105 | 43  | 59  |
| A33_1531 | 23  | 4   | 18  |
| A33_1532 | 30  | 21  | 17  |
| A33_1533 | 23  | 8   | 15  |
| A33_1534 | 22  | 16  | 13  |
| A33_1535 | 104 | 81  | 59  |
| A33_1536 | 23  | 11  | 12  |
| A33_1537 | 20  | 16  | 23  |
| A33_1538 | 65  | 56  | 40  |
| A33_1539 | 30  | 22  | 19  |
| A33_1540 | 73  | 42  | 36  |
| A33_1541 | 10  | 10  | 10  |
| A33_1542 | 57  | 30  | 36  |
| A33_1543 | 33  | 26  | 22  |
| A33_1544 | 29  | 26  | 18  |
| A33_1545 | 248 | 87  | 273 |
| A33_1546 | 80  | 13  | 23  |
| A33_1547 | 9   | 16  | 19  |
| A33_1548 | 35  | 18  | 26  |
| A33_1549 | 48  | 14  | 21  |
| A33_1550 | 44  | 34  | 12  |
| A33_1552 | 5   | 1   | 5   |
| A33_1553 | 7   | 8   | 6   |
| A33_1554 | 76  | 68  | 55  |
| A33_1555 | 6   | 9   | 8   |
| A33_1556 | 37  | 20  | 14  |
| A33_1557 | 59  | 32  | 31  |
| A33_1558 | 44  | 19  | 24  |
| A33_1559 | 22  | 10  | 10  |
| A33_1560 | 39  | 32  | 27  |
| A33_1561 | 2   | 4   | 0   |
| A33_1562 | 2   | 1   | 2   |
| A33_1563 | 22  | 23  | 32  |
| A33_1564 | 24  | 26  | 17  |
| A33_1565 | 9   | 13  | 9   |
| A33_1566 | 162 | 115 | 97  |
| A33_1567 | 96  | 87  | 76  |
| A33_1568 | 544 | 246 | 599 |
| A33_1569 | 80  | 55  | 60  |
| A33_1570 | 12  | 11  | 7   |
| A33_1571 | 19  | 19  | 8   |
| A33_1572 | 14  | 10  | 6   |

|          |     |     |     |
|----------|-----|-----|-----|
| A33_1573 | 49  | 34  | 40  |
| A33_1574 | 29  | 28  | 31  |
| A33_1575 | 161 | 151 | 163 |
| A33_1576 | 83  | 83  | 150 |
| A33_1577 | 43  | 54  | 137 |
| A33_1578 | 60  | 70  | 52  |
| A33_1579 | 29  | 13  | 25  |
| A33_1580 | 20  | 13  | 27  |
| A33_1581 | 44  | 37  | 68  |
| A33_1582 | 91  | 90  | 142 |
| A33_1583 | 46  | 29  | 89  |
| A33_1584 | 17  | 14  | 22  |
| A33_1585 | 50  | 10  | 39  |
| A33_1586 | 75  | 6   | 27  |
| A33_1587 | 67  | 12  | 34  |
| A33_1588 | 74  | 16  | 46  |
| A33_1589 | 76  | 10  | 49  |
| A33_1590 | 33  | 6   | 18  |
| A33_1591 | 49  | 45  | 53  |
| A33_1592 | 9   | 5   | 8   |
| A33_1593 | 77  | 48  | 63  |
| A33_1594 | 19  | 13  | 22  |
| A33_1595 | 0   | 0   | 0   |
| A33_1596 | 12  | 8   | 8   |
| A33_1597 | 8   | 1   | 5   |
| A33_1598 | 6   | 0   | 6   |
| A33_1599 | 8   | 5   | 6   |
| A33_1600 | 81  | 74  | 125 |
| A33_1601 | 25  | 15  | 21  |
| A33_1602 | 91  | 59  | 33  |
| A33_1603 | 674 | 438 | 262 |
| A33_1604 | 53  | 30  | 29  |
| A33_1605 | 13  | 7   | 20  |
| A33_1606 | 54  | 50  | 55  |
| A33_1607 | 92  | 69  | 99  |
| A33_1608 | 102 | 107 | 60  |
| A33_1609 | 25  | 11  | 28  |
| A33_1610 | 404 | 485 | 372 |
| A33_1611 | 23  | 12  | 11  |
| A33_1612 | 7   | 8   | 10  |
| A33_1613 | 78  | 39  | 41  |
| A33_1614 | 31  | 31  | 29  |
| A33_1615 | 10  | 13  | 14  |
| A33_1616 | 16  | 3   | 2   |
| A33_1617 | 24  | 22  | 28  |
| A33_1618 | 21  | 19  | 11  |
| A33_1619 | 15  | 13  | 17  |
| A33_1620 | 66  | 51  | 97  |



|          |      |      |      |
|----------|------|------|------|
| A33_1621 | 154  | 133  | 89   |
| A33_1622 | 114  | 107  | 97   |
| A33_1623 | 77   | 61   | 92   |
| A33_1624 | 63   | 61   | 75   |
| A33_1625 | 35   | 26   | 47   |
| A33_1626 | 118  | 53   | 93   |
| A33_1627 | 11   | 16   | 23   |
| A33_1628 | 29   | 19   | 28   |
| A33_1629 | 252  | 213  | 309  |
| A33_1630 | 16   | 20   | 17   |
| A33_1631 | 32   | 34   | 32   |
| A33_1632 | 97   | 61   | 110  |
| A33_1633 | 307  | 335  | 257  |
| A33_1634 | 350  | 252  | 377  |
| A33_1635 | 0    | 4    | 0    |
| A33_1636 | 0    | 0    | 0    |
| A33_1637 | 199  | 126  | 131  |
| A33_1638 | 12   | 3    | 25   |
| A33_1639 | 116  | 59   | 91   |
| A33_1640 | 0    | 0    | 0    |
| A33_1641 | 12   | 10   | 11   |
| A33_1642 | 37   | 23   | 26   |
| A33_1643 | 91   | 52   | 88   |
| A33_1644 | 2    | 5    | 4    |
| A33_1645 | 326  | 199  | 352  |
| A33_1646 | 572  | 384  | 386  |
| A33_1647 | 240  | 132  | 171  |
| A33_1648 | 0    | 0    | 3    |
| A33_1649 | 6    | 6    | 5    |
| A33_1650 | 107  | 94   | 78   |
| A33_1651 | 159  | 102  | 128  |
| A33_1652 | 127  | 115  | 74   |
| A33_1653 | 11   | 2    | 6    |
| A33_1654 | 24   | 17   | 26   |
| A33_1655 | 32   | 21   | 28   |
| A33_1656 | 76   | 68   | 74   |
| A33_1657 | 34   | 20   | 50   |
| A33_1658 | 72   | 62   | 54   |
| A33_1659 | 4884 | 6480 | 6882 |
| A33_1660 | 21   | 31   | 30   |
| A33_1662 | 2    | 0    | 1    |
| A33_1663 | 111  | 2    | 11   |
| A33_1664 | 33   | 0    | 44   |
| A33_1665 | 28   | 0    | 0    |
| A33_1666 | 23   | 4    | 6    |
| A33_1667 | 43   | 3    | 8    |
| A33_1668 | 58   | 8    | 8    |
| A33_1669 | 134  | 13   | 21   |

|          |      |    |    |
|----------|------|----|----|
| A33_1671 | 189  | 1  | 5  |
| A33_1672 | 16   | 2  | 1  |
| A33_1673 | 21   | 1  | 1  |
| A33_1674 | 1418 | 19 | 23 |
| A33_1675 | 64   | 9  | 0  |
| A33_1676 | 446  | 41 | 46 |
| A33_1677 | 278  | 15 | 37 |
| A33_1678 | 120  | 5  | 12 |
| A33_1679 | 152  | 9  | 4  |
| A33_1680 | 93   | 2  | 6  |
| A33_1681 | 97   | 5  | 6  |
| A33_1682 | 101  | 8  | 8  |
| A33_1683 | 127  | 1  | 7  |
| A33_1684 | 123  | 12 | 12 |
| A33_1685 | 40   | 0  | 19 |
| A33_1686 | 70   | 2  | 0  |
| A33_1687 | 108  | 5  | 2  |
| A33_1688 | 1415 | 47 | 38 |
| A33_1689 | 536  | 14 | 12 |
| A33_1690 | 39   | 11 | 8  |
| A33_1691 | 21   | 1  | 1  |
| A33_1692 | 54   | 4  | 6  |
| A33_1693 | 59   | 4  | 10 |
| A33_1694 | 35   | 0  | 4  |
| A33_1695 | 121  | 54 | 58 |
| A33_1696 | 31   | 7  | 7  |
| A33_1697 | 10   | 1  | 0  |
| A33_1698 | 7    | 0  | 2  |
| A33_1699 | 2    | 0  | 3  |
| A33_1700 | 22   | 7  | 2  |
| A33_1701 | 59   | 12 | 17 |
| A33_1702 | 2    | 0  | 0  |
| A33_1703 | 38   | 23 | 15 |
| A33_1704 | 3    | 0  | 0  |
| A33_1705 | 9    | 12 | 6  |
| A33_1706 | 23   | 15 | 18 |
| A33_1707 | 10   | 4  | 8  |
| A33_1708 | 25   | 9  | 19 |
| A33_1709 | 43   | 25 | 56 |
| A33_1710 | 17   | 7  | 12 |
| A33_1711 | 11   | 4  | 7  |
| A33_1712 | 4    | 4  | 10 |
| A33_1713 | 21   | 6  | 13 |
| A33_1714 | 6    | 7  | 6  |
| A33_1715 | 13   | 12 | 12 |
| A33_1716 | 10   | 10 | 12 |
| A33_1717 | 8    | 13 | 11 |
| A33_1718 | 4    | 3  | 0  |

|          |      |      |      |
|----------|------|------|------|
| A33_1719 | 2    | 1    | 0    |
| A33_1720 | 0    | 1    | 0    |
| A33_1721 | 0    | 1    | 1    |
| A33_1722 | 5    | 2    | 2    |
| A33_1723 | 1    | 0    | 0    |
| A33_1724 | 3    | 0    | 1    |
| A33_1725 | 44   | 49   | 17   |
| A33_1726 | 78   | 77   | 75   |
| A33_1727 | 125  | 93   | 114  |
| A33_1728 | 9    | 1    | 4    |
| A33_1729 | 2    | 0    | 0    |
| A33_1730 | 5    | 2    | 2    |
| A33_1731 | 4    | 3    | 2    |
| A33_1732 | 12   | 20   | 34   |
| A33_1733 | 158  | 143  | 176  |
| A33_1734 | 2519 | 2405 | 1964 |
| A33_1735 | 106  | 223  | 131  |
| A33_1736 | 76   | 52   | 52   |
| A33_1737 | 240  | 183  | 134  |
| A33_1738 | 144  | 54   | 99   |
| A33_1739 | 217  | 128  | 244  |
| A33_1740 | 1216 | 724  | 1342 |
| A33_1743 | 212  | 170  | 185  |
| A33_1744 | 202  | 176  | 165  |
| A33_1745 | 234  | 163  | 194  |
| A33_1746 | 157  | 111  | 136  |
| A33_1747 | 148  | 111  | 91   |
| A33_1748 | 89   | 120  | 100  |
| A33_1749 | 93   | 48   | 78   |
| A33_1750 | 73   | 13   | 69   |
| A33_1751 | 44   | 34   | 38   |
| A33_1752 | 187  | 113  | 131  |
| A33_1753 | 145  | 75   | 156  |
| A33_1754 | 39   | 11   | 27   |
| A33_1755 | 35   | 15   | 19   |
| A33_1756 | 16   | 15   | 23   |
| A33_1757 | 94   | 34   | 63   |
| A33_1760 | 45   | 41   | 39   |
| A33_1761 | 34   | 18   | 27   |
| A33_1762 | 21   | 12   | 33   |
| A33_1763 | 43   | 29   | 36   |
| A33_1764 | 155  | 81   | 279  |
| A33_1765 | 22   | 23   | 21   |
| A33_1766 | 48   | 52   | 39   |
| A33_1767 | 270  | 269  | 407  |
| A33_1768 | 209  | 163  | 170  |
| A33_1772 | 68   | 61   | 41   |
| A33_1773 | 59   | 40   | 24   |

|          |     |     |     |
|----------|-----|-----|-----|
| A33_1774 | 16  | 5   | 14  |
| A33_1775 | 3   | 0   | 1   |
| A33_1776 | 48  | 82  | 95  |
| A33_1777 | 330 | 204 | 304 |
| A33_1778 | 126 | 73  | 73  |
| A33_1779 | 233 | 185 | 115 |
| A33_1780 | 88  | 73  | 73  |
| A33_1781 | 101 | 123 | 61  |
| A33_1782 | 100 | 91  | 74  |
| A33_1783 | 286 | 177 | 180 |
| A33_1784 | 20  | 21  | 14  |
| A33_1785 | 33  | 42  | 36  |
| A33_1786 | 24  | 20  | 28  |
| A33_1787 | 36  | 32  | 26  |
| A33_1788 | 31  | 18  | 27  |
| A33_1789 | 49  | 32  | 77  |
| A33_1792 | 103 | 70  | 144 |
| A33_1794 | 17  | 18  | 14  |
| A33_1795 | 219 | 79  | 160 |
| A33_1796 | 0   | 0   | 0   |
| A33_1797 | 147 | 116 | 209 |
| A33_1798 | 254 | 192 | 143 |
| A33_1799 | 0   | 0   | 0   |
| A33_1800 | 275 | 155 | 381 |
| A33_1801 | 138 | 68  | 108 |
| A33_1802 | 138 | 68  | 193 |
| A33_1803 | 32  | 33  | 23  |
| A33_1804 | 24  | 25  | 18  |
| A33_1805 | 112 | 75  | 163 |
| A33_1806 | 64  | 17  | 55  |
| A33_1807 | 14  | 9   | 20  |
| A33_1808 | 117 | 101 | 85  |
| A33_1809 | 305 | 144 | 306 |
| A33_1810 | 130 | 139 | 200 |
| A33_1811 | 56  | 32  | 40  |
| A33_1812 | 229 | 177 | 190 |
| A33_1813 | 2   | 0   | 0   |
| A33_1814 | 91  | 55  | 122 |
| A33_1815 | 25  | 14  | 28  |
| A33_1816 | 18  | 12  | 11  |
| A33_1817 | 3   | 0   | 3   |
| A33_1818 | 12  | 13  | 11  |
| A33_1819 | 17  | 9   | 8   |
| A33_1820 | 17  | 16  | 16  |
| A33_1821 | 11  | 13  | 14  |
| A33_1822 | 2   | 2   | 0   |
| A33_1823 | 74  | 57  | 81  |
| A33_1824 | 71  | 65  | 71  |

|          |      |     |      |
|----------|------|-----|------|
| A33_1825 | 177  | 174 | 273  |
| A33_1826 | 337  | 411 | 456  |
| A33_1827 | 1415 | 794 | 788  |
| A33_1828 | 78   | 42  | 54   |
| A33_1829 | 2    | 0   | 4    |
| A33_1830 | 125  | 70  | 130  |
| A33_1831 | 871  | 615 | 661  |
| A33_1832 | 122  | 106 | 114  |
| A33_1835 | 0    | 0   | 0    |
| A33_1836 | 0    | 0   | 0    |
| A33_1837 | 486  | 455 | 471  |
| A33_1838 | 158  | 133 | 220  |
| A33_1840 | 39   | 50  | 41   |
| A33_1841 | 16   | 22  | 18   |
| A33_1842 | 272  | 235 | 77   |
| A33_1843 | 250  | 168 | 84   |
| A33_1844 | 830  | 692 | 348  |
| A33_1845 | 47   | 23  | 47   |
| A33_1846 | 614  | 518 | 331  |
| A33_1847 | 30   | 27  | 25   |
| A33_1848 | 12   | 7   | 6    |
| A33_1849 | 48   | 31  | 25   |
| A33_1850 | 22   | 14  | 9    |
| A33_1851 | 15   | 8   | 11   |
| A33_1852 | 165  | 119 | 79   |
| A33_1853 | 38   | 33  | 40   |
| A33_1854 | 8    | 11  | 10   |
| A33_1855 | 31   | 21  | 22   |
| A33_1856 | 25   | 10  | 12   |
| A33_1857 | 297  | 346 | 199  |
| A33_1858 | 110  | 32  | 134  |
| A33_1859 | 16   | 17  | 14   |
| A33_1860 | 9    | 10  | 13   |
| A33_1861 | 12   | 6   | 5    |
| A33_1862 | 0    | 1   | 1    |
| A33_1863 | 263  | 305 | 140  |
| A33_1864 | 305  | 332 | 203  |
| A33_1865 | 10   | 7   | 6    |
| A33_1866 | 7    | 10  | 7    |
| A33_1867 | 76   | 49  | 36   |
| A33_1868 | 298  | 231 | 305  |
| A33_1869 | 61   | 52  | 143  |
| A33_1870 | 41   | 16  | 54   |
| A33_1871 | 108  | 61  | 69   |
| A33_1872 | 83   | 45  | 35   |
| A33_1873 | 113  | 102 | 218  |
| A33_1874 | 70   | 61  | 104  |
| A33_1875 | 779  | 844 | 1284 |

|          |      |      |      |
|----------|------|------|------|
| A33_1876 | 0    | 0    | 0    |
| A33_1877 | 98   | 56   | 58   |
| A33_1878 | 29   | 17   | 13   |
| A33_1879 | 11   | 9    | 0    |
| A33_1880 | 22   | 23   | 24   |
| A33_1881 | 13   | 8    | 11   |
| A33_1882 | 5    | 6    | 6    |
| A33_1883 | 19   | 24   | 19   |
| A33_1884 | 41   | 36   | 28   |
| A33_1885 | 88   | 48   | 60   |
| A33_1886 | 55   | 57   | 41   |
| A33_1887 | 76   | 52   | 72   |
| A33_1888 | 62   | 30   | 68   |
| A33_1889 | 37   | 29   | 32   |
| A33_1890 | 31   | 39   | 28   |
| A33_1891 | 15   | 5    | 7    |
| A33_1892 | 40   | 41   | 59   |
| A33_1893 | 23   | 17   | 23   |
| A33_1894 | 223  | 150  | 141  |
| A33_1895 | 49   | 36   | 39   |
| A33_1896 | 250  | 197  | 237  |
| A33_1897 | 21   | 32   | 14   |
| A33_1898 | 108  | 80   | 102  |
| A33_1899 | 104  | 87   | 79   |
| A33_1900 | 69   | 48   | 37   |
| A33_1901 | 19   | 11   | 10   |
| A33_1902 | 0    | 0    | 0    |
| A33_1903 | 30   | 25   | 62   |
| A33_1904 | 339  | 257  | 279  |
| A33_1905 | 185  | 79   | 97   |
| A33_1906 | 49   | 35   | 32   |
| A33_1907 | 63   | 30   | 81   |
| A33_1908 | 0    | 0    | 3    |
| A33_1911 | 18   | 13   | 15   |
| A33_1912 | 35   | 25   | 71   |
| A33_1913 | 15   | 6    | 17   |
| A33_1914 | 24   | 17   | 30   |
| A33_1915 | 81   | 31   | 30   |
| A33_1916 | 190  | 129  | 137  |
| A33_1917 | 106  | 57   | 60   |
| A33_1918 | 39   | 26   | 33   |
| A33_1919 | 835  | 740  | 679  |
| A33_1920 | 3816 | 2251 | 2060 |
| A33_1921 | 18   | 24   | 15   |
| A33_1922 | 14   | 6    | 9    |
| A33_1923 | 458  | 585  | 469  |
| A33_1924 | 44   | 34   | 26   |
| A33_1925 | 33   | 17   | 21   |

|          |      |      |      |
|----------|------|------|------|
| A33_1926 | 59   | 61   | 79   |
| A33_1927 | 56   | 43   | 49   |
| A33_1928 | 121  | 131  | 110  |
| A33_1929 | 150  | 98   | 182  |
| A33_1930 | 1010 | 717  | 1805 |
| A33_1931 | 72   | 61   | 91   |
| A33_1933 | 550  | 523  | 452  |
| A33_1934 | 860  | 453  | 390  |
| A33_1935 | 104  | 92   | 86   |
| A33_1936 | 161  | 114  | 139  |
| A33_1937 | 169  | 126  | 177  |
| A33_1938 | 11   | 9    | 8    |
| A33_1939 | 5    | 6    | 6    |
| A33_1940 | 640  | 754  | 655  |
| A33_1941 | 8    | 5    | 2    |
| A33_1942 | 618  | 443  | 1069 |
| A33_1943 | 90   | 56   | 65   |
| A33_1944 | 21   | 21   | 21   |
| A33_1945 | 253  | 163  | 222  |
| A33_1946 | 123  | 74   | 101  |
| A33_1947 | 112  | 82   | 85   |
| A33_1948 | 3446 | 2465 | 4541 |
| A33_1949 | 9    | 9    | 4    |
| A33_1950 | 22   | 8    | 13   |
| A33_1951 | 24   | 17   | 20   |
| A33_1952 | 521  | 307  | 1452 |
| A33_1953 | 1120 | 723  | 1287 |
| A33_1954 | 8    | 6    | 4    |
| A33_1955 | 15   | 30   | 13   |
| A33_1956 | 75   | 45   | 51   |
| A33_1957 | 71   | 63   | 37   |
| A33_1958 | 124  | 111  | 83   |
| A33_1959 | 38   | 38   | 27   |
| A33_1960 | 49   | 44   | 35   |
| A33_1961 | 54   | 44   | 55   |
| A33_1962 | 43   | 34   | 44   |
| A33_1963 | 56   | 44   | 50   |
| A33_1964 | 18   | 25   | 22   |
| A33_1965 | 31   | 24   | 37   |
| A33_1966 | 324  | 213  | 178  |
| A33_1967 | 763  | 527  | 419  |
| A33_1968 | 302  | 228  | 188  |
| A33_1970 | 320  | 220  | 162  |
| A33_1971 | 392  | 250  | 205  |
| A33_1972 | 501  | 344  | 315  |
| A33_1973 | 344  | 227  | 278  |
| A33_1974 | 552  | 431  | 318  |
| A33_1975 | 265  | 241  | 170  |

|          |      |      |      |
|----------|------|------|------|
| A33_1976 | 167  | 85   | 75   |
| A33_1977 | 44   | 38   | 26   |
| A33_1978 | 365  | 460  | 257  |
| A33_1979 | 31   | 11   | 29   |
| A33_1980 | 48   | 43   | 50   |
| A33_1981 | 78   | 49   | 121  |
| A33_1982 | 60   | 61   | 64   |
| A33_1983 | 85   | 141  | 73   |
| A33_1984 | 67   | 139  | 45   |
| A33_1985 | 114  | 200  | 114  |
| A33_1987 | 27   | 24   | 40   |
| A33_1988 | 36   | 22   | 57   |
| A33_1989 | 41   | 16   | 21   |
| A33_1990 | 1045 | 902  | 664  |
| A33_1991 | 517  | 429  | 618  |
| A33_1992 | 828  | 702  | 688  |
| A33_1993 | 733  | 596  | 674  |
| A33_1994 | 1335 | 1300 | 655  |
| A33_1995 | 852  | 638  | 678  |
| A33_1996 | 707  | 603  | 775  |
| A33_1997 | 537  | 437  | 431  |
| A33_1998 | 2210 | 1070 | 1833 |
| A33_1999 | 61   | 50   | 58   |
| A33_2000 | 25   | 15   | 40   |
| A33_2001 | 283  | 271  | 233  |
| A33_2002 | 129  | 75   | 194  |
| A33_2003 | 2    | 2    | 1    |
| A33_2005 | 1    | 3    | 0    |
| A33_2006 | 10   | 10   | 18   |
| A33_2008 | 200  | 211  | 185  |
| A33_2009 | 171  | 86   | 276  |
| A33_2012 | 0    | 0    | 0    |
| A33_2013 | 464  | 462  | 700  |
| A33_2014 | 23   | 21   | 22   |
| A33_2015 | 143  | 68   | 102  |
| A33_2016 | 37   | 83   | 98   |
| A33_2017 | 10   | 8    | 14   |
| A33_2018 | 40   | 52   | 34   |
| A33_2019 | 287  | 286  | 437  |
| A33_2020 | 139  | 86   | 177  |
| A33_2021 | 28   | 41   | 35   |
| A33_2022 | 67   | 50   | 40   |
| A33_2023 | 60   | 39   | 19   |
| A33_2024 | 72   | 55   | 53   |
| A33_2025 | 104  | 61   | 35   |
| A33_2026 | 139  | 81   | 69   |
| A33_2027 | 525  | 376  | 247  |
| A33_2028 | 170  | 129  | 83   |



|          |     |     |     |
|----------|-----|-----|-----|
| A33_2029 | 236 | 170 | 124 |
| A33_2030 | 131 | 64  | 35  |
| A33_2031 | 0   | 12  | 0   |
| A33_2032 | 34  | 27  | 12  |
| A33_2033 | 71  | 42  | 35  |
| A33_2034 | 64  | 44  | 34  |
| A33_2035 | 269 | 161 | 104 |
| A33_2036 | 99  | 62  | 59  |
| A33_2037 | 195 | 110 | 76  |
| A33_2038 | 90  | 46  | 47  |
| A33_2039 | 61  | 34  | 45  |
| A33_2040 | 295 | 191 | 244 |
| A33_2041 | 173 | 75  | 130 |
| A33_2042 | 240 | 181 | 133 |
| A33_2043 | 225 | 200 | 116 |
| A33_2044 | 431 | 536 | 334 |
| A33_2045 | 488 | 360 | 226 |
| A33_2046 | 455 | 138 | 101 |
| A33_2047 | 60  | 31  | 17  |
| A33_2048 | 145 | 136 | 150 |
| A33_2049 | 20  | 22  | 24  |
| A33_2050 | 17  | 24  | 44  |
| A33_2051 | 74  | 181 | 81  |
| A33_2052 | 25  | 22  | 101 |
| A33_2053 | 23  | 18  | 44  |
| A33_2054 | 85  | 79  | 77  |
| A33_2055 | 193 | 132 | 94  |
| A33_2056 | 186 | 118 | 132 |
| A33_2057 | 387 | 310 | 514 |
| A33_2058 | 28  | 24  | 42  |
| A33_2059 | 71  | 64  | 134 |
| A33_2060 | 127 | 61  | 59  |
| A33_2061 | 84  | 61  | 81  |
| A33_2062 | 36  | 26  | 40  |
| A33_2063 | 64  | 65  | 98  |
| A33_2064 | 308 | 298 | 356 |
| A33_2065 | 59  | 78  | 87  |
| A33_2066 | 66  | 63  | 57  |
| A33_2067 | 214 | 157 | 328 |
| A33_2068 | 4   | 0   | 3   |
| A33_2069 | 12  | 13  | 12  |
| A33_2070 | 12  | 6   | 29  |
| A33_2072 | 481 | 324 | 497 |
| A33_2073 | 146 | 86  | 155 |
| A33_2074 | 44  | 36  | 20  |
| A33_2075 | 43  | 33  | 13  |
| A33_2076 | 24  | 27  | 19  |
| A33_2077 | 38  | 31  | 53  |

|          |      |      |      |
|----------|------|------|------|
| A33_2078 | 56   | 36   | 46   |
| A33_2079 | 14   | 5    | 20   |
| A33_2080 | 41   | 35   | 54   |
| A33_2081 | 257  | 144  | 367  |
| A33_2083 | 86   | 48   | 55   |
| A33_2085 | 136  | 380  | 129  |
| A33_2086 | 4    | 0    | 5    |
| A33_2087 | 534  | 652  | 511  |
| A33_2088 | 0    | 0    | 0    |
| A33_2089 | 0    | 0    | 0    |
| A33_2090 | 0    | 0    | 0    |
| A33_2091 | 14   | 295  | 112  |
| A33_2092 | 0    | 0    | 0    |
| A33_2093 | 1451 | 1400 | 1421 |
| A33_2094 | 0    | 0    | 0    |
| A33_2095 | 21   | 4    | 78   |
| A33_2096 | 0    | 0    | 0    |
| A33_2097 | 0    | 0    | 0    |
| A33_2098 | 0    | 0    | 0    |
| A33_2099 | 0    | 0    | 0    |
| A33_2100 | 451  | 170  | 100  |
| A33_2101 | 0    | 0    | 0    |
| A33_2102 | 0    | 0    | 0    |
| A33_2103 | 7    | 8    | 9    |
| A33_2104 | 0    | 0    | 0    |
| A33_2105 | 7    | 13   | 10   |
| A33_2106 | 2    | 6    | 3    |
| A33_2107 | 42   | 46   | 27   |
| A33_2108 | 11   | 12   | 12   |
| A33_2109 | 0    | 1    | 3    |
| A33_2110 | 2    | 3    | 2    |
| A33_2111 | 0    | 0    | 4    |
| A33_2112 | 2    | 1    | 2    |
| A33_2113 | 2    | 4    | 5    |
| A33_2116 | 2    | 2    | 4    |
| A33_2117 | 3    | 1    | 4    |
| A33_2118 | 0    | 2    | 0    |
| A33_2119 | 7    | 7    | 8    |
| A33_2120 | 2    | 2    | 5    |
| A33_2122 | 6    | 1    | 2    |
| A33_2123 | 2    | 0    | 2    |
| A33_2124 | 11   | 5    | 14   |
| A33_2125 | 19   | 8    | 22   |
| A33_2126 | 6    | 6    | 12   |
| A33_2127 | 4    | 3    | 2    |
| A33_2128 | 2    | 1    | 1    |
| A33_2129 | 1    | 5    | 2    |
| A33_2130 | 33   | 11   | 48   |

|          |      |      |      |
|----------|------|------|------|
| A33_2131 | 22   | 11   | 5    |
| A33_2132 | 0    | 0    | 0    |
| A33_2133 | 0    | 1    | 1    |
| A33_2134 | 0    | 5    | 4    |
| A33_2135 | 2    | 1    | 1    |
| A33_2136 | 6    | 1    | 3    |
| A33_2137 | 2    | 4    | 2    |
| A33_2138 | 2    | 5    | 3    |
| A33_2139 | 2    | 2    | 3    |
| A33_2140 | 1    | 1    | 0    |
| A33_2141 | 3    | 0    | 4    |
| A33_2142 | 4    | 1    | 13   |
| A33_2143 | 3    | 2    | 10   |
| A33_2144 | 2    | 2    | 3    |
| A33_2145 | 94   | 45   | 87   |
| A33_2146 | 59   | 51   | 105  |
| A33_2147 | 50   | 39   | 35   |
| A33_2148 | 0    | 0    | 0    |
| A33_2149 | 1265 | 427  | 262  |
| A33_2150 | 156  | 65   | 26   |
| A33_2152 | 0    | 0    | 0    |
| A33_2153 | 0    | 0    | 0    |
| A33_2154 | 0    | 0    | 0    |
| A33_2155 | 473  | 148  | 105  |
| A33_2156 | 161  | 91   | 90   |
| A33_2157 | 307  | 310  | 185  |
| A33_2158 | 89   | 113  | 87   |
| A33_2159 | 329  | 329  | 259  |
| A33_2160 | 177  | 144  | 263  |
| A33_2161 | 368  | 219  | 129  |
| A33_2162 | 235  | 160  | 81   |
| A33_2163 | 54   | 32   | 22   |
| A33_2164 | 13   | 13   | 12   |
| A33_2165 | 104  | 101  | 145  |
| A33_2166 | 28   | 32   | 32   |
| A33_2167 | 6    | 7    | 15   |
| A33_2168 | 2481 | 1263 | 3542 |
| A33_2169 | 127  | 81   | 141  |
| A33_2170 | 27   | 20   | 59   |
| A33_2171 | 136  | 88   | 274  |
| A33_2172 | 10   | 7    | 11   |
| A33_2173 | 0    | 0    | 0    |
| A33_2174 | 0    | 2    | 3    |
| A33_2175 | 8    | 6    | 9    |
| A33_2176 | 17   | 15   | 9    |
| A33_2177 | 2412 | 3213 | 1479 |
| A33_2178 | 46   | 32   | 53   |
| A33_2179 | 28   | 24   | 34   |

|          |     |     |     |
|----------|-----|-----|-----|
| A33_2180 | 31  | 38  | 41  |
| A33_2181 | 131 | 82  | 110 |
| A33_2182 | 100 | 19  | 109 |
| A33_2183 | 75  | 36  | 90  |
| A33_2184 | 129 | 87  | 109 |
| A33_2185 | 147 | 159 | 230 |
| A33_2186 | 327 | 217 | 279 |
| A33_2187 | 117 | 52  | 94  |
| A33_2188 | 56  | 102 | 69  |
| A33_2189 | 70  | 138 | 128 |
| A33_2190 | 25  | 18  | 29  |
| A33_2191 | 66  | 86  | 72  |
| A33_2192 | 44  | 27  | 69  |
| A33_2193 | 38  | 36  | 41  |
| A33_2194 | 5   | 7   | 7   |
| A33_2195 | 102 | 109 | 265 |
| A33_2196 | 38  | 49  | 19  |
| A33_2197 | 779 | 881 | 425 |
| A33_2198 | 46  | 33  | 36  |
| A33_2199 | 168 | 118 | 254 |
| A33_2200 | 66  | 69  | 59  |
| A33_2201 | 23  | 17  | 23  |
| A33_2202 | 23  | 16  | 18  |
| A33_2203 | 130 | 91  | 82  |
| A33_2204 | 166 | 79  | 102 |
| A33_2205 | 314 | 264 | 241 |
| A33_2206 | 386 | 303 | 456 |
| A33_2207 | 160 | 116 | 125 |
| A33_2208 | 148 | 116 | 115 |
| A33_2211 | 623 | 388 | 857 |
| A33_2212 | 177 | 124 | 175 |
| A33_2213 | 581 | 242 | 586 |
| A33_2214 | 398 | 169 | 311 |
| A33_2215 | 119 | 57  | 155 |
| A33_2216 | 33  | 37  | 37  |
| A33_2217 | 153 | 115 | 105 |
| A33_2218 | 17  | 19  | 27  |
| A33_2219 | 22  | 12  | 16  |
| A33_2220 | 88  | 53  | 46  |
| A33_2221 | 146 | 77  | 141 |
| A33_2222 | 221 | 201 | 198 |
| A33_2223 | 191 | 155 | 190 |
| A33_2224 | 199 | 161 | 147 |
| A33_2225 | 227 | 150 | 182 |
| A33_2226 | 99  | 73  | 88  |
| A33_2227 | 55  | 18  | 38  |
| A33_2228 | 116 | 84  | 174 |
| A33_2229 | 0   | 7   | 6   |

|          |     |     |     |
|----------|-----|-----|-----|
| A33_2230 | 31  | 33  | 36  |
| A33_2231 | 327 | 110 | 282 |
| A33_2232 | 39  | 27  | 27  |
| A33_2233 | 177 | 104 | 135 |
| A33_2234 | 41  | 42  | 45  |
| A33_2235 | 49  | 51  | 43  |
| A33_2236 | 26  | 19  | 27  |
| A33_2237 | 11  | 9   | 8   |
| A33_2240 | 73  | 53  | 99  |
| A33_2241 | 38  | 32  | 30  |
| A33_2242 | 53  | 48  | 45  |
| A33_2243 | 145 | 72  | 65  |
| A33_2244 | 628 | 462 | 389 |
| A33_2245 | 683 | 596 | 551 |
| A33_2246 | 603 | 486 | 378 |
| A33_2247 | 963 | 811 | 697 |
| A33_2248 | 616 | 516 | 542 |
| A33_2249 | 739 | 538 | 655 |
| A33_2250 | 74  | 43  | 83  |
| A33_2251 | 15  | 5   | 14  |
| A33_2252 | 110 | 106 | 273 |
| A33_2253 | 41  | 46  | 75  |
| A33_2254 | 17  | 13  | 15  |
| A33_2255 | 225 | 117 | 112 |
| A33_2256 | 185 | 75  | 110 |
| A33_2257 | 78  | 35  | 33  |
| A33_2258 | 505 | 119 | 208 |
| A33_2259 | 10  | 6   | 10  |
| A33_2260 | 24  | 27  | 41  |
| A33_2261 | 16  | 24  | 20  |
| A33_2262 | 9   | 10  | 15  |
| A33_2263 | 13  | 7   | 12  |
| A33_2264 | 38  | 36  | 43  |
| A33_2265 | 15  | 16  | 9   |
| A33_2266 | 4   | 8   | 6   |
| A33_2267 | 33  | 17  | 65  |
| A33_2268 | 41  | 42  | 32  |
| A33_2269 | 34  | 33  | 26  |
| A33_2270 | 37  | 42  | 39  |
| A33_2271 | 21  | 24  | 15  |
| A33_2272 | 19  | 7   | 17  |
| A33_2273 | 248 | 94  | 210 |
| A33_2274 | 52  | 42  | 69  |
| A33_2275 | 3   | 5   | 4   |
| A33_2276 | 45  | 30  | 53  |
| A33_2277 | 37  | 35  | 47  |
| A33_2278 | 29  | 25  | 50  |
| A33_2279 | 22  | 33  | 16  |

|          |      |     |      |
|----------|------|-----|------|
| A33_2280 | 33   | 33  | 66   |
| A33_2281 | 13   | 18  | 9    |
| A33_2282 | 47   | 10  | 17   |
| A33_2283 | 4    | 5   | 3    |
| A33_2284 | 89   | 35  | 30   |
| A33_2285 | 91   | 51  | 85   |
| A33_2286 | 1680 | 736 | 1152 |
| A33_2287 | 65   | 37  | 41   |
| A33_2288 | 55   | 61  | 50   |
| A33_2289 | 85   | 75  | 106  |
| A33_2290 | 48   | 36  | 81   |
| A33_2291 | 258  | 167 | 251  |
| A33_2292 | 103  | 86  | 46   |
| A33_2293 | 48   | 51  | 34   |
| A33_2294 | 179  | 93  | 187  |
| A33_2295 | 1    | 0   | 0    |
| A33_2296 | 382  | 171 | 239  |
| A33_2297 | 50   | 49  | 52   |
| A33_2298 | 56   | 43  | 106  |
| A33_2299 | 98   | 69  | 138  |
| A33_2300 | 35   | 25  | 34   |
| A33_2301 | 596  | 843 | 273  |
| A33_2302 | 308  | 561 | 287  |
| A33_2303 | 67   | 36  | 59   |
| A33_2304 | 89   | 40  | 50   |
| A33_2305 | 291  | 387 | 327  |
| A33_2306 | 54   | 37  | 58   |
| A33_2307 | 65   | 67  | 54   |
| A33_2308 | 44   | 46  | 44   |
| A33_2309 | 92   | 163 | 128  |
| A33_2310 | 11   | 21  | 14   |
| A33_2311 | 93   | 239 | 95   |
| A33_2312 | 341  | 248 | 262  |
| A33_2313 | 78   | 70  | 71   |
| A33_2314 | 9    | 13  | 6    |
| A33_2315 | 8    | 17  | 15   |
| A33_2316 | 5    | 7   | 7    |
| A33_2317 | 9    | 12  | 10   |
| A33_2318 | 113  | 97  | 155  |
| A33_2319 | 116  | 108 | 124  |
| A33_2320 | 45   | 27  | 54   |
| A33_2321 | 157  | 45  | 125  |
| A33_2322 | 20   | 13  | 15   |
| A33_2323 | 31   | 13  | 10   |
| A33_2324 | 12   | 9   | 7    |
| A33_2325 | 231  | 101 | 129  |
| A33_2326 | 20   | 15  | 8    |
| A33_2328 | 6    | 6   | 5    |

|          |     |     |     |
|----------|-----|-----|-----|
| A33_2329 | 132 | 136 | 290 |
| A33_2330 | 88  | 53  | 291 |
| A33_2331 | 238 | 319 | 441 |
| A33_2332 | 16  | 21  | 17  |
| A33_2333 | 107 | 99  | 98  |
| A33_2334 | 0   | 0   | 0   |
| A33_2335 | 41  | 34  | 57  |
| A33_2338 | 285 | 228 | 222 |
| A33_2339 | 256 | 129 | 179 |
| A33_2340 | 61  | 57  | 37  |
| A33_2341 | 54  | 33  | 35  |
| A33_2342 | 44  | 43  | 27  |
| A33_2343 | 54  | 47  | 45  |
| A33_2344 | 74  | 69  | 56  |
| A33_2345 | 94  | 65  | 72  |
| A33_2346 | 111 | 60  | 75  |
| A33_2347 | 68  | 56  | 56  |
| A33_2348 | 93  | 49  | 42  |
| A33_2349 | 175 | 105 | 116 |
| A33_2350 | 926 | 771 | 560 |
| A33_2351 | 279 | 197 | 154 |
| A33_2352 | 225 | 113 | 149 |
| A33_2353 | 83  | 36  | 52  |
| A33_2354 | 92  | 111 | 148 |
| A33_2355 | 42  | 32  | 28  |
| A33_2356 | 73  | 52  | 96  |
| A33_2357 | 75  | 54  | 58  |
| A33_2358 | 109 | 133 | 104 |
| A33_2359 | 60  | 84  | 86  |
| A33_2360 | 32  | 9   | 18  |
| A33_2361 | 2   | 1   | 1   |
| A33_2362 | 0   | 1   | 1   |
| A33_2363 | 2   | 2   | 4   |
| A33_2364 | 35  | 34  | 42  |
| A33_2365 | 41  | 25  | 43  |
| A33_2366 | 125 | 105 | 122 |
| A33_2367 | 12  | 10  | 37  |
| A33_2368 | 73  | 54  | 41  |
| A33_2369 | 61  | 33  | 45  |
| A33_2370 | 93  | 100 | 69  |
| A33_2371 | 106 | 84  | 89  |
| A33_2372 | 73  | 94  | 61  |
| A33_2373 | 77  | 72  | 50  |
| A33_2375 | 155 | 122 | 121 |
| A33_2376 | 34  | 33  | 38  |
| A33_2377 | 89  | 59  | 84  |
| A33_2378 | 263 | 176 | 246 |
| A33_2379 | 389 | 263 | 307 |

|          |      |      |      |
|----------|------|------|------|
| A33_2380 | 47   | 27   | 25   |
| A33_2381 | 50   | 26   | 68   |
| A33_2382 | 55   | 54   | 61   |
| A33_2383 | 42   | 37   | 41   |
| A33_2384 | 24   | 25   | 29   |
| A33_2385 | 1218 | 507  | 635  |
| A33_2386 | 113  | 81   | 115  |
| A33_2387 | 0    | 4    | 0    |
| A33_2388 | 89   | 84   | 68   |
| A33_2389 | 96   | 96   | 107  |
| A33_2390 | 77   | 106  | 108  |
| A33_2391 | 74   | 114  | 74   |
| A33_2392 | 112  | 120  | 83   |
| A33_2393 | 105  | 157  | 125  |
| A33_2394 | 57   | 108  | 92   |
| A33_2395 | 30   | 42   | 36   |
| A33_2396 | 95   | 81   | 102  |
| A33_2397 | 16   | 10   | 8    |
| A33_2398 | 143  | 114  | 75   |
| A33_2399 | 44   | 37   | 36   |
| A33_2400 | 79   | 45   | 50   |
| A33_2401 | 229  | 139  | 120  |
| A33_2402 | 242  | 297  | 176  |
| A33_2403 | 325  | 396  | 240  |
| A33_2404 | 928  | 824  | 1165 |
| A33_2405 | 1562 | 2024 | 1084 |
| A33_2406 | 27   | 55   | 32   |
| A33_2407 | 121  | 72   | 63   |
| A33_2408 | 125  | 192  | 78   |
| A33_2409 | 448  | 546  | 207  |
| A33_2410 | 109  | 47   | 140  |
| A33_2411 | 1147 | 1485 | 1318 |
| A33_2412 | 126  | 134  | 121  |
| A33_2413 | 74   | 96   | 84   |
| A33_2414 | 133  | 70   | 115  |
| A33_2417 | 22   | 20   | 37   |
| A33_2418 | 68   | 40   | 57   |
| A33_2419 | 75   | 91   | 110  |
| A33_2420 | 536  | 917  | 831  |
| A33_2421 | 116  | 168  | 270  |
| A33_2422 | 71   | 37   | 47   |
| A33_2423 | 622  | 340  | 654  |
| A33_2424 | 6    | 5    | 6    |
| A33_2425 | 7    | 6    | 3    |
| A33_2426 | 5    | 5    | 12   |
| A33_2427 | 61   | 48   | 101  |
| A33_2428 | 47   | 48   | 88   |
| A33_2429 | 86   | 65   | 111  |



|          |        |        |        |
|----------|--------|--------|--------|
| A33_2430 | 38     | 50     | 68     |
| A33_2431 | 9      | 9      | 5      |
| A33_2432 | 211282 | 342020 | 183455 |
| A33_2433 | 633    | 1232   | 739    |
| A33_2434 | 0      | 0      | 0      |
| A33_2435 | 0      | 0      | 0      |
| A33_2437 | 594    | 1101   | 1690   |
| A33_2438 | 24     | 12     | 10     |
| A33_2439 | 121    | 75     | 70     |
| A33_2440 | 123    | 68     | 81     |
| A33_2441 | 343    | 200    | 313    |
| A33_2442 | 32     | 19     | 39     |
| A33_2443 | 102    | 72     | 78     |
| A33_2444 | 42     | 43     | 46     |
| A33_2445 | 22     | 17     | 10     |
| A33_2446 | 16     | 13     | 10     |
| A33_2447 | 0      | 7      | 3      |
| A33_2448 | 32     | 32     | 39     |
| A33_2449 | 8      | 9      | 11     |
| A33_2450 | 34     | 18     | 51     |
| A33_2451 | 20     | 9      | 20     |
| A33_2452 | 81     | 70     | 121    |
| A33_2453 | 19     | 15     | 21     |
| A33_2454 | 119    | 125    | 120    |
| A33_2455 | 72     | 106    | 142    |
| A33_2456 | 153    | 132    | 129    |
| A33_2457 | 187    | 110    | 157    |
| A33_2458 | 109    | 77     | 78     |
| A33_2459 | 94     | 59     | 76     |
| A33_2460 | 111    | 95     | 112    |
| A33_2461 | 23     | 28     | 21     |
| A33_2462 | 28     | 26     | 35     |
| A33_2463 | 159    | 168    | 145    |
| A33_2464 | 56     | 56     | 72     |
| A33_2465 | 73     | 90     | 79     |
| A33_2466 | 92     | 89     | 100    |
| A33_2467 | 393    | 456    | 313    |
| A33_2468 | 433    | 506    | 1047   |
| A33_2469 | 183    | 117    | 145    |
| A33_2470 | 192    | 117    | 162    |
| A33_2471 | 104    | 77     | 90     |
| A33_2472 | 47     | 42     | 48     |
| A33_2473 | 113    | 136    | 128    |
| A33_2474 | 430    | 239    | 433    |
| A33_2475 | 3      | 4      | 5      |
| A33_2476 | 6      | 6      | 5      |
| A33_2477 | 20     | 18     | 34     |
| A33_2478 | 103    | 95     | 117    |

|          |      |      |      |
|----------|------|------|------|
| A33_2479 | 138  | 103  | 166  |
| A33_2480 | 171  | 256  | 342  |
| A33_2481 | 471  | 280  | 501  |
| A33_2482 | 152  | 145  | 200  |
| A33_2483 | 68   | 82   | 54   |
| A33_2484 | 56   | 66   | 63   |
| A33_2485 | 23   | 24   | 34   |
| A33_2486 | 339  | 97   | 180  |
| A33_2487 | 19   | 7    | 24   |
| A33_2488 | 24   | 12   | 34   |
| A33_2489 | 5    | 0    | 3    |
| A33_2490 | 33   | 31   | 21   |
| A33_2491 | 98   | 154  | 86   |
| A33_2492 | 45   | 44   | 47   |
| A33_2493 | 3    | 4    | 8    |
| A33_2494 | 13   | 23   | 19   |
| A33_2495 | 10   | 4    | 4    |
| A33_2496 | 3    | 3    | 2    |
| A33_2497 | 199  | 108  | 252  |
| A33_2498 | 27   | 15   | 28   |
| A33_2499 | 6    | 7    | 6    |
| A33_2500 | 11   | 18   | 16   |
| A33_2501 | 2    | 5    | 2    |
| A33_2504 | 12   | 18   | 93   |
| A33_2505 | 1101 | 693  | 500  |
| A33_2506 | 1431 | 814  | 663  |
| A33_2507 | 645  | 349  | 435  |
| A33_2508 | 396  | 316  | 357  |
| A33_2509 | 1117 | 762  | 1030 |
| A33_2511 | 441  | 391  | 386  |
| A33_2512 | 713  | 422  | 328  |
| A33_2513 | 1160 | 684  | 491  |
| A33_2514 | 810  | 401  | 495  |
| A33_2515 | 488  | 415  | 510  |
| A33_2516 | 653  | 442  | 438  |
| A33_2517 | 967  | 748  | 603  |
| A33_2518 | 1030 | 992  | 878  |
| A33_2519 | 1996 | 1382 | 1467 |
| A33_2522 | 671  | 584  | 567  |
| A33_2523 | 640  | 462  | 708  |
| A33_2524 | 1284 | 769  | 736  |
| A33_2525 | 1183 | 933  | 938  |
| A33_2526 | 1165 | 1079 | 736  |
| A33_2527 | 548  | 387  | 550  |
| A33_2528 | 301  | 400  | 702  |
| A33_2529 | 708  | 539  | 551  |
| A33_2530 | 303  | 208  | 425  |
| A33_2531 | 536  | 289  | 477  |

|          |      |      |      |
|----------|------|------|------|
| A33_2532 | 95   | 106  | 84   |
| A33_2534 | 0    | 7    | 5    |
| A33_2535 | 80   | 78   | 118  |
| A33_2536 | 5    | 7    | 10   |
| A33_2537 | 119  | 73   | 52   |
| A33_2538 | 504  | 421  | 438  |
| A33_2539 | 137  | 147  | 89   |
| A33_2542 | 63   | 97   | 94   |
| A33_2543 | 178  | 163  | 102  |
| A33_2544 | 187  | 185  | 175  |
| A33_2545 | 47   | 34   | 49   |
| A33_2546 | 170  | 178  | 122  |
| A33_2547 | 41   | 34   | 50   |
| A33_2548 | 8    | 8    | 2    |
| A33_2551 | 423  | 351  | 757  |
| A33_2552 | 319  | 458  | 590  |
| A33_2553 | 564  | 815  | 707  |
| A33_2554 | 276  | 355  | 425  |
| A33_2555 | 1487 | 1831 | 2199 |
| A33_2556 | 36   | 23   | 37   |
| A33_2557 | 41   | 20   | 26   |
| A33_2558 | 67   | 53   | 41   |
| A33_2559 | 18   | 6    | 8    |
| A33_2560 | 133  | 57   | 196  |
| A33_2561 | 146  | 100  | 118  |
| A33_2562 | 247  | 89   | 186  |
| A33_2563 | 23   | 16   | 18   |
| A33_2564 | 175  | 162  | 129  |
| A33_2565 | 95   | 76   | 88   |
| A33_2566 | 95   | 56   | 74   |
| A33_2567 | 18   | 21   | 7    |
| A33_2568 | 3    | 1    | 4    |
| A33_2569 | 2    | 4    | 4    |
| A33_2570 | 2    | 3    | 2    |
| A33_2571 | 1    | 2    | 2    |
| A33_2572 | 44   | 38   | 51   |
| A33_2573 | 0    | 0    | 0    |
| A33_2574 | 74   | 53   | 100  |
| A33_2575 | 7    | 3    | 4    |
| A33_2576 | 16   | 16   | 20   |
| A33_2577 | 67   | 53   | 58   |
| A33_2578 | 9    | 8    | 8    |
| A33_2579 | 25   | 52   | 32   |
| A33_2580 | 19   | 62   | 103  |
| A33_2581 | 43   | 134  | 225  |
| A33_2582 | 32   | 31   | 64   |
| A33_2583 | 124  | 83   | 91   |
| A33_2584 | 123  | 95   | 113  |

|          |      |      |      |
|----------|------|------|------|
| A33_2585 | 21   | 22   | 42   |
| A33_2586 | 149  | 128  | 159  |
| A33_2587 | 107  | 92   | 96   |
| A33_2588 | 206  | 170  | 285  |
| A33_2589 | 177  | 83   | 73   |
| A33_2590 | 56   | 45   | 42   |
| A33_2591 | 495  | 759  | 323  |
| A33_2592 | 228  | 312  | 169  |
| A33_2593 | 192  | 247  | 153  |
| A33_2594 | 283  | 352  | 79   |
| A33_2595 | 715  | 422  | 921  |
| A33_2596 | 23   | 16   | 19   |
| A33_2597 | 766  | 303  | 601  |
| A33_2598 | 1120 | 1099 | 796  |
| A33_2599 | 70   | 81   | 58   |
| A33_2600 | 52   | 77   | 77   |
| A33_2601 | 53   | 71   | 70   |
| A33_2602 | 59   | 65   | 39   |
| A33_2603 | 47   | 53   | 65   |
| A33_2604 | 1315 | 724  | 1141 |
| A33_2605 | 15   | 13   | 10   |
| A33_2606 | 1000 | 787  | 840  |
| A33_2607 | 35   | 32   | 32   |
| A33_2608 | 123  | 89   | 73   |
| A33_2609 | 36   | 26   | 35   |
| A33_2610 | 90   | 61   | 100  |
| A33_2611 | 14   | 10   | 6    |
| A33_2612 | 129  | 73   | 115  |
| A33_2613 | 39   | 35   | 31   |
| A33_2614 | 2009 | 601  | 1334 |
| A33_2615 | 36   | 39   | 27   |
| A33_2616 | 29   | 15   | 28   |
| A33_2617 | 40   | 22   | 46   |
| A33_2618 | 81   | 54   | 61   |
| A33_2619 | 85   | 37   | 81   |
| A33_2620 | 128  | 174  | 459  |
| A33_2621 | 60   | 23   | 67   |
| A33_2622 | 295  | 209  | 334  |
| A33_2623 | 81   | 50   | 45   |
| A33_2624 | 24   | 20   | 72   |
| A33_2625 | 48   | 58   | 66   |
| A33_2626 | 65   | 72   | 51   |
| A33_2627 | 63   | 83   | 105  |
| A33_2628 | 43   | 35   | 34   |
| A33_2629 | 99   | 120  | 91   |
| A33_2630 | 43   | 35   | 24   |
| A33_2631 | 1216 | 657  | 662  |
| A33_2632 | 531  | 374  | 296  |

|          |      |      |      |
|----------|------|------|------|
| A33_2633 | 4    | 5    | 2    |
| A33_2634 | 17   | 21   | 21   |
| A33_2635 | 163  | 196  | 116  |
| A33_2636 | 22   | 25   | 16   |
| A33_2637 | 939  | 881  | 1173 |
| A33_2638 | 284  | 331  | 456  |
| A33_2639 | 9    | 8    | 8    |
| A33_2640 | 22   | 18   | 23   |
| A33_2641 | 282  | 152  | 604  |
| A33_2642 | 140  | 145  | 105  |
| A33_2643 | 31   | 24   | 30   |
| A33_2644 | 3    | 4    | 4    |
| A33_2645 | 43   | 42   | 45   |
| A33_2646 | 225  | 140  | 236  |
| A33_2647 | 22   | 12   | 10   |
| A33_2648 | 53   | 27   | 37   |
| A33_2649 | 34   | 13   | 22   |
| A33_2650 | 34   | 16   | 20   |
| A33_2651 | 83   | 41   | 54   |
| A33_2652 | 31   | 17   | 33   |
| A33_2653 | 23   | 16   | 20   |
| A33_2654 | 28   | 20   | 21   |
| A33_2655 | 108  | 93   | 51   |
| A33_2656 | 14   | 9    | 18   |
| A33_2658 | 3    | 5    | 2    |
| A33_2659 | 114  | 71   | 155  |
| A33_2660 | 73   | 74   | 49   |
| A33_2661 | 28   | 18   | 25   |
| A33_2662 | 64   | 62   | 57   |
| A33_2663 | 53   | 57   | 41   |
| A33_2664 | 115  | 125  | 77   |
| A33_2665 | 86   | 63   | 45   |
| A33_2666 | 61   | 89   | 39   |
| A33_2667 | 46   | 50   | 41   |
| A33_2668 | 112  | 132  | 96   |
| A33_2669 | 281  | 266  | 255  |
| A33_2670 | 107  | 136  | 69   |
| A33_2671 | 97   | 120  | 87   |
| A33_2672 | 171  | 148  | 143  |
| A33_2673 | 103  | 89   | 112  |
| A33_2674 | 87   | 105  | 179  |
| A33_2675 | 112  | 79   | 158  |
| A33_2676 | 1976 | 3815 | 2404 |
| A33_2677 | 35   | 34   | 38   |
| A33_2678 | 73   | 91   | 78   |
| A33_2679 | 110  | 115  | 94   |
| A33_2680 | 32   | 35   | 35   |
| A33_2681 | 3    | 3    | 3    |

|           |      |     |     |
|-----------|------|-----|-----|
| A33_2682  | 95   | 51  | 85  |
| A33_2683  | 2    | 0   | 3   |
| A33_2684  | 0    | 0   | 5   |
| A33_2685  | 149  | 69  | 111 |
| A33_2686  | 5    | 6   | 13  |
| A33_2687  | 23   | 11  | 17  |
| A33_2688  | 43   | 34  | 30  |
| A33_2689  | 67   | 46  | 34  |
| A33_2690  | 26   | 27  | 32  |
| A33_2691  | 0    | 0   | 0   |
| A33_2692  | 0    | 0   | 0   |
| A33_2693  | 0    | 0   | 0   |
| A33_2694  | 0    | 0   | 0   |
| A33_A0001 | 0    | 0   | 0   |
| A33_A0002 | 55   | 76  | 36  |
| A33_A0003 | 51   | 19  | 40  |
| A33_A0004 | 106  | 43  | 44  |
| A33_A0005 | 71   | 34  | 37  |
| A33_A0006 | 219  | 176 | 271 |
| A33_A0007 | 162  | 107 | 236 |
| A33_A0008 | 2    | 4   | 0   |
| A33_A0009 | 18   | 22  | 29  |
| A33_A0010 | 26   | 33  | 30  |
| A33_A0011 | 35   | 57  | 38  |
| A33_A0012 | 57   | 66  | 77  |
| A33_A0013 | 96   | 116 | 78  |
| A33_A0014 | 14   | 14  | 10  |
| A33_A0015 | 8    | 4   | 10  |
| A33_A0016 | 3    | 4   | 6   |
| A33_A0017 | 4    | 3   | 8   |
| A33_A0018 | 0    | 0   | 0   |
| A33_A0019 | 14   | 19  | 70  |
| A33_A0020 | 66   | 13  | 17  |
| A33_A0021 | 691  | 211 | 326 |
| A33_A0022 | 1057 | 269 | 700 |
| A33_A0023 | 226  | 102 | 148 |
| A33_A0024 | 53   | 24  | 42  |
| A33_A0025 | 3    | 0   | 0   |
| A33_A0026 | 151  | 121 | 276 |
| A33_A0027 | 7    | 4   | 11  |
| A33_A0028 | 266  | 212 | 794 |
| A33_A0029 | 41   | 45  | 31  |
| A33_A0030 | 71   | 43  | 37  |
| A33_A0031 | 56   | 52  | 48  |
| A33_A0032 | 369  | 300 | 357 |
| A33_A0033 | 0    | 2   | 3   |
| A33_A0034 | 718  | 563 | 539 |
| A33_A0035 | 0    | 4   | 5   |

|           |     |     |     |
|-----------|-----|-----|-----|
| A33_A0036 | 103 | 88  | 140 |
| A33_A0037 | 937 | 140 | 321 |
| A33_A0038 | 24  | 5   | 12  |
| A33_A0039 | 37  | 12  | 20  |
| A33_A0041 | 120 | 139 | 165 |
| A33_A0042 | 30  | 21  | 26  |
| A33_A0043 | 42  | 62  | 49  |
| A33_A0044 | 24  | 25  | 18  |
| A33_A0045 | 9   | 5   | 4   |
| A33_A0046 | 0   | 1   | 1   |
| A33_A0047 | 1   | 2   | 1   |
| A33_A0048 | 2   | 1   | 2   |
| A33_A0049 | 4   | 2   | 0   |
| A33_A0050 | 116 | 98  | 94  |
| A33_A0051 | 40  | 33  | 35  |
| A33_A0052 | 18  | 2   | 9   |
| A33_A0053 | 14  | 5   | 7   |
| A33_A0054 | 16  | 7   | 15  |
| A33_A0055 | 689 | 370 | 338 |
| A33_A0056 | 0   | 0   | 0   |
| A33_A0057 | 226 | 234 | 124 |
| A33_A0058 | 91  | 47  | 31  |
| A33_A0059 | 41  | 17  | 4   |
| A33_A0060 | 3   | 0   | 7   |
| A33_A0061 | 13  | 9   | 14  |
| A33_A0062 | 0   | 0   | 0   |
| A33_A0063 | 3   | 3   | 5   |
| A33_A0064 | 19  | 23  | 19  |
| A33_A0065 | 1   | 0   | 4   |
| A33_A0066 | 28  | 27  | 23  |
| A33_A0067 | 7   | 1   | 6   |
| A33_A0068 | 679 | 330 | 370 |
| A33_A0069 | 406 | 242 | 144 |
| A33_A0070 | 50  | 6   | 28  |
| A33_A0071 | 163 | 48  | 84  |
| A33_A0072 | 99  | 23  | 53  |
| A33_A0073 | 681 | 276 | 279 |
| A33_A0074 | 121 | 57  | 47  |
| A33_A0076 | 46  | 35  | 59  |
| A33_A0077 | 79  | 48  | 74  |
| A33_A0078 | 79  | 76  | 90  |
| A33_A0079 | 62  | 27  | 49  |
| A33_A0080 | 83  | 52  | 74  |
| A33_A0081 | 7   | 5   | 6   |
| A33_A0082 | 203 | 200 | 151 |
| A33_A0083 | 101 | 65  | 69  |
| A33_A0084 | 171 | 70  | 143 |
| A33_A0085 | 32  | 23  | 15  |

|           |      |     |     |
|-----------|------|-----|-----|
| A33_A0086 | 47   | 12  | 32  |
| A33_A0087 | 39   | 21  | 50  |
| A33_A0088 | 112  | 77  | 110 |
| A33_A0089 | 91   | 25  | 92  |
| A33_A0090 | 105  | 71  | 76  |
| A33_A0091 | 26   | 25  | 28  |
| A33_A0092 | 14   | 4   | 9   |
| A33_A0093 | 38   | 38  | 31  |
| A33_A0094 | 8    | 11  | 8   |
| A33_A0095 | 34   | 32  | 25  |
| A33_A0096 | 42   | 29  | 31  |
| A33_A0097 | 108  | 152 | 217 |
| A33_A0098 | 58   | 91  | 52  |
| A33_A0099 | 97   | 122 | 138 |
| A33_A0100 | 62   | 61  | 100 |
| A33_A0101 | 38   | 60  | 46  |
| A33_A0102 | 22   | 39  | 12  |
| A33_A0103 | 16   | 30  | 19  |
| A33_A0104 | 8    | 9   | 10  |
| A33_A0105 | 4    | 4   | 4   |
| A33_A0106 | 86   | 136 | 97  |
| A33_A0107 | 194  | 140 | 154 |
| A33_A0108 | 17   | 11  | 10  |
| A33_A0109 | 83   | 41  | 57  |
| A33_A0110 | 14   | 7   | 8   |
| A33_A0111 | 46   | 21  | 22  |
| A33_A0112 | 60   | 38  | 61  |
| A33_A0113 | 113  | 36  | 135 |
| A33_A0114 | 35   | 16  | 22  |
| A33_A0115 | 1    | 0   | 1   |
| A33_A0116 | 1    | 2   | 4   |
| A33_A0117 | 30   | 19  | 30  |
| A33_A0118 | 47   | 39  | 51  |
| A33_A0119 | 21   | 12  | 16  |
| A33_A0120 | 91   | 43  | 96  |
| A33_A0121 | 1404 | 816 | 469 |
| A33_A0122 | 4    | 0   | 8   |
| A33_A0123 | 30   | 18  | 30  |
| A33_A0124 | 23   | 25  | 31  |
| A33_A0125 | 76   | 191 | 153 |
| A33_A0126 | 46   | 29  | 69  |
| A33_A0127 | 141  | 134 | 146 |
| A33_A0128 | 31   | 23  | 31  |
| A33_A0129 | 190  | 169 | 98  |
| A33_A0130 | 171  | 104 | 55  |
| A33_A0131 | 1237 | 624 | 435 |
| A33_A0132 | 0    | 0   | 0   |
| A33_A0133 | 173  | 59  | 132 |



|           |     |     |     |
|-----------|-----|-----|-----|
| A33_A0134 | 10  | 3   | 5   |
| A33_A0135 | 157 | 108 | 213 |
| A33_A0136 | 12  | 11  | 17  |
| A33_A0137 | 269 | 161 | 162 |
| A33_A0138 | 349 | 319 | 579 |
| A33_A0139 | 34  | 17  | 42  |
| A33_A0140 | 264 | 227 | 267 |
| A33_A0141 | 33  | 25  | 41  |
| A33_A0142 | 115 | 113 | 110 |
| A33_A0143 | 323 | 472 | 939 |
| A33_A0144 | 70  | 57  | 94  |
| A33_A0145 | 29  | 14  | 17  |
| A33_A0146 | 3   | 1   | 2   |
| A33_A0147 | 27  | 18  | 40  |
| A33_A0148 | 12  | 15  | 11  |
| A33_A0149 | 4   | 3   | 12  |
| A33_A0150 | 19  | 5   | 11  |
| A33_A0151 | 125 | 176 | 114 |
| A33_A0152 | 16  | 16  | 37  |
| A33_A0153 | 413 | 213 | 402 |
| A33_A0154 | 33  | 35  | 31  |
| A33_A0155 | 61  | 80  | 69  |
| A33_A0156 | 0   | 0   | 0   |
| A33_A0157 | 70  | 17  | 32  |
| A33_A0158 | 0   | 0   | 0   |
| A33_A0159 | 41  | 40  | 38  |
| A33_A0160 | 28  | 18  | 59  |
| A33_A0161 | 30  | 49  | 35  |
| A33_A0162 | 221 | 183 | 140 |
| A33_A0163 | 49  | 29  | 21  |
| A33_A0164 | 66  | 22  | 20  |
| A33_A0165 | 61  | 46  | 59  |
| A33_A0166 | 18  | 13  | 11  |
| A33_A0167 | 27  | 17  | 13  |
| A33_A0168 | 37  | 36  | 26  |
| A33_A0169 | 16  | 18  | 22  |
| A33_A0170 | 139 | 89  | 153 |
| A33_A0171 | 28  | 20  | 18  |
| A33_A0172 | 3   | 3   | 4   |
| A33_A0173 | 35  | 17  | 33  |
| A33_A0174 | 498 | 169 | 494 |
| A33_A0175 | 44  | 31  | 50  |
| A33_A0176 | 9   | 4   | 10  |
| A33_A0177 | 45  | 18  | 53  |
| A33_A0178 | 130 | 51  | 128 |
| A33_A0179 | 11  | 15  | 9   |
| A33_A0180 | 40  | 45  | 58  |
| A33_A0181 | 18  | 10  | 16  |

|           |     |     |     |
|-----------|-----|-----|-----|
| A33_A0182 | 6   | 4   | 10  |
| A33_A0183 | 47  | 28  | 31  |
| A33_A0184 | 22  | 15  | 17  |
| A33_A0185 | 4   | 3   | 2   |
| A33_A0186 | 0   | 0   | 0   |
| A33_A0187 | 3   | 6   | 5   |
| A33_A0188 | 0   | 0   | 0   |
| A33_A0189 | 3   | 2   | 2   |
| A33_A0190 | 31  | 27  | 35  |
| A33_A0191 | 21  | 25  | 12  |
| A33_A0192 | 17  | 21  | 3   |
| A33_A0193 | 20  | 25  | 39  |
| A33_A0194 | 10  | 13  | 10  |
| A33_A0195 | 19  | 19  | 20  |
| A33_A0196 | 0   | 0   | 0   |
| A33_A0197 | 6   | 6   | 3   |
| A33_A0198 | 134 | 99  | 80  |
| A33_A0199 | 108 | 114 | 79  |
| A33_A0200 | 21  | 42  | 38  |
| A33_A0201 | 8   | 3   | 8   |
| A33_A0202 | 59  | 58  | 59  |
| A33_A0203 | 190 | 115 | 143 |
| A33_A0204 | 107 | 74  | 84  |
| A33_A0205 | 145 | 319 | 128 |
| A33_A0206 | 13  | 6   | 15  |
| A33_A0207 | 73  | 44  | 61  |
| A33_A0208 | 173 | 139 | 212 |
| A33_A0209 | 533 | 254 | 272 |
| A33_A0210 | 78  | 73  | 68  |
| A33_A0211 | 63  | 48  | 194 |
| A33_A0212 | 247 | 108 | 179 |
| A33_A0213 | 68  | 65  | 67  |
| A33_A0214 | 56  | 49  | 32  |
| A33_A0215 | 67  | 64  | 39  |
| A33_A0216 | 68  | 9   | 36  |
| A33_A0217 | 61  | 61  | 184 |
| A33_A0218 | 49  | 70  | 68  |
| A33_A0219 | 16  | 10  | 10  |
| A33_A0220 | 85  | 46  | 50  |
| A33_A0221 | 24  | 22  | 11  |
| A33_A0222 | 144 | 167 | 172 |
| A33_A0223 | 44  | 52  | 72  |
| A33_A0224 | 49  | 56  | 81  |
| A33_A0225 | 15  | 11  | 20  |
| A33_A0226 | 26  | 30  | 19  |
| A33_A0227 | 5   | 4   | 7   |
| A33_A0228 | 67  | 22  | 38  |
| A33_A0229 | 54  | 64  | 66  |

|           |     |     |     |
|-----------|-----|-----|-----|
| A33_A0230 | 19  | 5   | 8   |
| A33_A0231 | 1   | 3   | 4   |
| A33_A0232 | 38  | 48  | 83  |
| A33_A0233 | 31  | 27  | 41  |
| A33_A0234 | 11  | 4   | 9   |
| A33_A0235 | 10  | 6   | 10  |
| A33_A0236 | 156 | 144 | 112 |
| A33_A0237 | 72  | 52  | 101 |
| A33_A0238 | 29  | 18  | 19  |
| A33_A0239 | 6   | 8   | 4   |
| A33_A0240 | 32  | 33  | 37  |
| A33_A0241 | 33  | 24  | 31  |
| A33_A0242 | 178 | 130 | 215 |
| A33_A0243 | 16  | 25  | 13  |
| A33_A0244 | 9   | 8   | 6   |
| A33_A0245 | 0   | 0   | 0   |
| A33_A0246 | 0   | 0   | 0   |
| A33_A0247 | 258 | 168 | 98  |
| A33_A0248 | 38  | 25  | 38  |
| A33_A0249 | 137 | 77  | 65  |
| A33_A0250 | 239 | 249 | 165 |
| A33_A0251 | 0   | 0   | 0   |
| A33_A0252 | 237 | 159 | 100 |
| A33_A0253 | 480 | 475 | 356 |
| A33_A0254 | 749 | 453 | 444 |
| A33_A0255 | 87  | 41  | 101 |
| A33_A0256 | 190 | 145 | 174 |
| A33_A0257 | 571 | 358 | 350 |
| A33_A0258 | 85  | 63  | 86  |
| A33_A0259 | 71  | 41  | 66  |
| A33_A0260 | 206 | 132 | 272 |
| A33_A0261 | 81  | 51  | 63  |
| A33_A0262 | 70  | 53  | 57  |
| A33_A0263 | 93  | 79  | 96  |
| A33_A0264 | 73  | 81  | 76  |
| A33_A0265 | 124 | 100 | 95  |
| A33_A0266 | 113 | 73  | 34  |
| A33_A0267 | 69  | 72  | 27  |
| A33_A0268 | 80  | 51  | 28  |
| A33_A0269 | 76  | 49  | 29  |
| A33_A0270 | 75  | 62  | 32  |
| A33_A0271 | 157 | 102 | 44  |
| A33_A0272 | 131 | 77  | 46  |
| A33_A0273 | 138 | 89  | 66  |
| A33_A0274 | 221 | 124 | 44  |
| A33_A0275 | 115 | 55  | 43  |
| A33_A0276 | 126 | 60  | 66  |
| A33_A0277 | 119 | 55  | 69  |

|           |     |     |     |
|-----------|-----|-----|-----|
| A33_A0278 | 9   | 10  | 11  |
| A33_A0279 | 4   | 3   | 5   |
| A33_A0280 | 1   | 2   | 0   |
| A33_A0281 | 2   | 5   | 9   |
| A33_A0282 | 0   | 2   | 1   |
| A33_A0283 | 33  | 29  | 23  |
| A33_A0284 | 40  | 52  | 52  |
| A33_A0285 | 35  | 31  | 19  |
| A33_A0286 | 7   | 12  | 10  |
| A33_A0287 | 2   | 3   | 5   |
| A33_A0288 | 0   | 1   | 2   |
| A33_A0289 | 3   | 3   | 3   |
| A33_A0290 | 28  | 18  | 14  |
| A33_A0291 | 106 | 73  | 120 |
| A33_A0292 | 66  | 41  | 59  |
| A33_A0293 | 81  | 35  | 54  |
| A33_A0294 | 0   | 0   | 0   |
| A33_A0295 | 120 | 101 | 89  |
| A33_A0296 | 54  | 46  | 33  |
| A33_A0297 | 952 | 991 | 912 |
| A33_A0298 | 76  | 11  | 38  |
| A33_A0299 | 184 | 54  | 255 |
| A33_A0300 | 49  | 44  | 46  |
| A33_A0301 | 43  | 31  | 15  |
| A33_A0302 | 173 | 9   | 35  |
| A33_A0303 | 11  | 10  | 14  |
| A33_A0304 | 72  | 43  | 35  |
| A33_A0305 | 48  | 45  | 24  |
| A33_A0306 | 69  | 79  | 62  |
| A33_A0307 | 571 | 116 | 65  |
| A33_A0308 | 16  | 3   | 3   |
| A33_A0309 | 22  | 5   | 3   |
| A33_A0310 | 38  | 14  | 11  |
| A33_A0311 | 25  | 13  | 8   |
| A33_A0312 | 53  | 22  | 43  |
| A33_A0313 | 4   | 0   | 1   |
| A33_A0314 | 11  | 4   | 7   |
| A33_A0315 | 243 | 236 | 316 |
| A33_A0316 | 98  | 48  | 133 |
| A33_A0317 | 21  | 22  | 13  |
| A33_A0318 | 603 | 450 | 843 |
| A33_A0319 | 360 | 256 | 486 |
| A33_A0320 | 25  | 9   | 11  |
| A33_A0321 | 61  | 20  | 20  |
| A33_A0322 | 19  | 17  | 14  |
| A33_A0323 | 4   | 3   | 2   |
| A33_A0324 | 61  | 47  | 89  |
| A33_A0325 | 28  | 17  | 12  |

|           |       |      |      |
|-----------|-------|------|------|
| A33_A0326 | 60    | 35   | 76   |
| A33_A0327 | 10    | 8    | 17   |
| A33_A0328 | 11    | 15   | 22   |
| A33_A0329 | 33    | 17   | 33   |
| A33_A0330 | 71    | 99   | 212  |
| A33_A0331 | 23    | 9    | 12   |
| A33_A0332 | 129   | 93   | 128  |
| A33_A0333 | 0     | 1    | 9    |
| A33_A0334 | 18    | 17   | 14   |
| A33_A0335 | 80    | 37   | 33   |
| A33_A0336 | 38    | 12   | 23   |
| A33_A0337 | 70    | 59   | 35   |
| A33_A0338 | 81    | 46   | 38   |
| A33_A0339 | 3606  | 1950 | 237  |
| A33_A0340 | 182   | 135  | 75   |
| A33_A0341 | 34    | 68   | 72   |
| A33_A0342 | 42    | 36   | 51   |
| A33_A0343 | 48    | 61   | 57   |
| A33_A0344 | 179   | 132  | 171  |
| A33_A0345 | 13090 | 5807 | 9598 |
| A33_A0346 | 2     | 4    | 10   |
| A33_A0347 | 80    | 27   | 32   |
| A33_A0348 | 24    | 19   | 17   |
| A33_A0349 | 6     | 8    | 5    |
| A33_A0350 | 3     | 5    | 6    |
| A33_A0351 | 6     | 9    | 6    |
| A33_A0352 | 10    | 8    | 7    |
| A33_A0353 | 9     | 4    | 7    |
| A33_A0354 | 15    | 9    | 15   |
| A33_A0355 | 5     | 12   | 9    |
| A33_A0356 | 4     | 0    | 2    |
| A33_A0357 | 3     | 12   | 16   |
| A33_A0358 | 22    | 12   | 25   |
| A33_A0359 | 42    | 40   | 82   |
| A33_A0360 | 0     | 0    | 6    |
| A33_A0361 | 4     | 3    | 4    |
| A33_A0362 | 29    | 7    | 11   |
| A33_A0363 | 1219  | 868  | 1592 |
| A33_A0364 | 492   | 237  | 338  |
| A33_A0365 | 52    | 42   | 40   |
| A33_A0366 | 25    | 10   | 27   |
| A33_A0367 | 129   | 81   | 45   |
| A33_A0368 | 38    | 60   | 41   |
| A33_A0369 | 8     | 14   | 13   |
| A33_A0370 | 79    | 45   | 68   |
| A33_A0371 | 464   | 86   | 281  |
| A33_A0372 | 19    | 14   | 13   |
| A33_A0373 | 0     | 7    | 3    |

|           |     |     |     |
|-----------|-----|-----|-----|
| A33_A0374 | 26  | 17  | 33  |
| A33_A0375 | 63  | 58  | 87  |
| A33_A0376 | 16  | 19  | 33  |
| A33_A0377 | 5   | 2   | 1   |
| A33_A0378 | 0   | 2   | 1   |
| A33_A0379 | 8   | 12  | 9   |
| A33_A0380 | 48  | 23  | 61  |
| A33_A0381 | 32  | 41  | 139 |
| A33_A0382 | 102 | 114 | 348 |
| A33_A0383 | 228 | 200 | 256 |
| A33_A0384 | 23  | 14  | 23  |
| A33_A0385 | 49  | 35  | 43  |
| A33_A0386 | 95  | 84  | 104 |
| A33_A0387 | 17  | 9   | 12  |
| A33_A0388 | 61  | 40  | 73  |
| A33_A0389 | 46  | 39  | 41  |
| A33_A0390 | 466 | 181 | 245 |
| A33_A0391 | 646 | 373 | 199 |
| A33_A0392 | 355 | 188 | 55  |
| A33_A0393 | 139 | 78  | 26  |
| A33_A0394 | 71  | 44  | 18  |
| A33_A0395 | 96  | 64  | 41  |
| A33_A0396 | 76  | 47  | 19  |
| A33_A0397 | 86  | 50  | 30  |
| A33_A0398 | 76  | 65  | 27  |
| A33_A0399 | 98  | 57  | 32  |
| A33_A0400 | 74  | 40  | 21  |
| A33_A0401 | 31  | 24  | 15  |
| A33_A0402 | 98  | 49  | 20  |
| A33_A0403 | 100 | 67  | 27  |
| A33_A0404 | 66  | 55  | 40  |
| A33_A0406 | 40  | 39  | 27  |
| A33_A0407 | 18  | 18  | 28  |
| A33_A0408 | 21  | 16  | 24  |
| A33_A0409 | 18  | 10  | 11  |
| A33_A0410 | 132 | 107 | 163 |
| A33_A0411 | 13  | 4   | 14  |
| A33_A0412 | 14  | 9   | 13  |
| A33_A0413 | 23  | 16  | 17  |
| A33_A0414 | 151 | 93  | 102 |
| A33_A0415 | 19  | 14  | 23  |
| A33_A0416 | 30  | 20  | 30  |
| A33_A0417 | 56  | 52  | 59  |
| A33_A0418 | 92  | 76  | 54  |
| A33_A0419 | 73  | 51  | 55  |
| A33_A0420 | 93  | 42  | 75  |
| A33_A0421 | 103 | 50  | 47  |
| A33_A0422 | 42  | 18  | 47  |

|           |      |     |      |
|-----------|------|-----|------|
| A33_A0423 | 49   | 59  | 54   |
| A33_A0424 | 19   | 15  | 18   |
| A33_A0425 | 42   | 48  | 51   |
| A33_A0426 | 4    | 0   | 3    |
| A33_A0427 | 0    | 2   | 0    |
| A33_A0428 | 28   | 22  | 32   |
| A33_A0429 | 6    | 6   | 6    |
| A33_A0430 | 10   | 11  | 17   |
| A33_A0431 | 9    | 6   | 7    |
| A33_A0432 | 39   | 5   | 14   |
| A33_A0433 | 21   | 12  | 15   |
| A33_A0434 | 22   | 15  | 9    |
| A33_A0435 | 3    | 3   | 8    |
| A33_A0436 | 14   | 10  | 7    |
| A33_A0437 | 7    | 6   | 5    |
| A33_A0438 | 17   | 18  | 18   |
| A33_A0439 | 31   | 14  | 14   |
| A33_A0440 | 64   | 51  | 26   |
| A33_A0441 | 29   | 27  | 23   |
| A33_A0442 | 46   | 37  | 36   |
| A33_A0443 | 32   | 22  | 22   |
| A33_A0444 | 102  | 72  | 83   |
| A33_A0445 | 190  | 229 | 215  |
| A33_A0446 | 5    | 6   | 2    |
| A33_A0447 | 85   | 95  | 69   |
| A33_A0448 | 0    | 0   | 0    |
| A33_A0449 | 35   | 20  | 33   |
| A33_A0450 | 26   | 19  | 16   |
| A33_A0451 | 13   | 13  | 18   |
| A33_A0452 | 1666 | 609 | 2350 |
| A33_A0453 | 149  | 170 | 240  |
| A33_A0454 | 29   | 45  | 24   |
| A33_A0456 | 8    | 8   | 7    |
| A33_A0457 | 29   | 18  | 18   |
| A33_A0458 | 23   | 13  | 35   |
| A33_A0459 | 18   | 15  | 6    |
| A33_A0460 | 13   | 5   | 11   |
| A33_A0461 | 2    | 0   | 3    |
| A33_A0462 | 56   | 29  | 28   |
| A33_A0463 | 161  | 93  | 213  |
| A33_A0464 | 15   | 13  | 18   |
| A33_A0465 | 2    | 5   | 6    |
| A33_A0466 | 2    | 3   | 4    |
| A33_A0467 | 6    | 0   | 0    |
| A33_A0468 | 10   | 15  | 6    |
| A33_A0469 | 16   | 12  | 14   |
| A33_A0470 | 27   | 19  | 25   |
| A33_A0471 | 7    | 11  | 8    |

|           |      |      |      |
|-----------|------|------|------|
| A33_A0472 | 1928 | 801  | 3429 |
| A33_A0473 | 42   | 30   | 32   |
| A33_A0474 | 750  | 1503 | 706  |
| A33_A0475 | 2    | 0    | 3    |
| A33_A0476 | 85   | 73   | 110  |
| A33_A0477 | 101  | 97   | 65   |
| A33_A0478 | 55   | 57   | 56   |
| A33_A0479 | 153  | 116  | 167  |
| A33_A0480 | 62   | 41   | 31   |
| A33_A0481 | 6    | 8    | 4    |
| A33_A0482 | 28   | 27   | 39   |
| A33_A0483 | 36   | 14   | 23   |
| A33_A0484 | 11   | 8    | 11   |
| A33_A0485 | 50   | 35   | 32   |
| A33_A0486 | 17   | 6    | 17   |
| A33_A0487 | 11   | 0    | 18   |
| A33_A0488 | 10   | 4    | 6    |
| A33_A0489 | 46   | 74   | 32   |
| A33_A0490 | 20   | 9    | 8    |
| A33_A0491 | 86   | 52   | 166  |
| A33_A0492 | 34   | 21   | 36   |
| A33_A0493 | 37   | 33   | 23   |
| A33_A0494 | 49   | 33   | 26   |
| A33_A0495 | 107  | 92   | 89   |
| A33_A0496 | 8    | 7    | 10   |
| A33_A0497 | 79   | 20   | 36   |
| A33_A0498 | 0    | 0    | 3    |
| A33_A0499 | 12   | 14   | 9    |
| A33_A0500 | 542  | 477  | 404  |
| A33_A0501 | 8    | 3    | 8    |
| A33_A0503 | 132  | 97   | 68   |
| A33_A0504 | 98   | 54   | 71   |
| A33_A0505 | 126  | 92   | 95   |
| A33_A0506 | 110  | 107  | 59   |
| A33_A0507 | 141  | 200  | 94   |
| A33_A0508 | 34   | 35   | 35   |
| A33_A0509 | 134  | 111  | 162  |
| A33_A0510 | 148  | 64   | 148  |
| A33_A0511 | 11   | 5    | 8    |
| A33_A0512 | 9    | 7    | 4    |
| A33_A0516 | 94   | 60   | 120  |
| A33_A0517 | 134  | 118  | 109  |
| A33_A0518 | 129  | 111  | 62   |
| A33_A0519 | 37   | 19   | 37   |
| A33_A0520 | 10   | 7    | 8    |
| A33_A0521 | 55   | 11   | 51   |
| A33_A0522 | 34   | 40   | 36   |
| A33_A0523 | 25   | 24   | 30   |



|           |      |     |      |
|-----------|------|-----|------|
| A33_A0524 | 33   | 6   | 19   |
| A33_A0525 | 4    | 4   | 5    |
| A33_A0526 | 5    | 0   | 3    |
| A33_A0527 | 3    | 2   | 1    |
| A33_A0528 | 6    | 3   | 3    |
| A33_A0529 | 6    | 6   | 10   |
| A33_A0530 | 3    | 12  | 7    |
| A33_A0531 | 40   | 41  | 33   |
| A33_A0532 | 10   | 8   | 29   |
| A33_A0533 | 246  | 176 | 167  |
| A33_A0534 | 5    | 7   | 3    |
| A33_A0535 | 5    | 0   | 3    |
| A33_A0536 | 27   | 24  | 33   |
| A33_A0537 | 3    | 5   | 6    |
| A33_A0538 | 8    | 8   | 3    |
| A33_A0539 | 19   | 20  | 21   |
| A33_A0540 | 16   | 18  | 20   |
| A33_A0541 | 10   | 10  | 21   |
| A33_A0542 | 2    | 2   | 12   |
| A33_A0543 | 45   | 36  | 34   |
| A33_A0544 | 3    | 4   | 3    |
| A33_A0545 | 3    | 5   | 2    |
| A33_A0546 | 1    | 0   | 1    |
| A33_A0547 | 52   | 21  | 63   |
| A33_A0548 | 311  | 154 | 284  |
| A33_A0549 | 8    | 9   | 8    |
| A33_A0550 | 58   | 36  | 28   |
| A33_A0551 | 17   | 13  | 9    |
| A33_A0552 | 78   | 82  | 132  |
| A33_A0553 | 14   | 39  | 25   |
| A33_A0554 | 347  | 184 | 483  |
| A33_A0555 | 68   | 14  | 18   |
| A33_A0556 | 0    | 2   | 0    |
| A33_A0557 | 14   | 16  | 17   |
| A33_A0558 | 440  | 234 | 445  |
| A33_A0559 | 0    | 0   | 0    |
| A33_A0560 | 2362 | 852 | 1523 |
| A33_A0561 | 354  | 100 | 287  |
| A33_A0562 | 102  | 123 | 128  |
| A33_A0563 | 694  | 261 | 544  |
| A33_A0564 | 63   | 60  | 63   |
| A33_A0565 | 22   | 33  | 25   |
| A33_A0566 | 103  | 94  | 70   |
| A33_A0567 | 0    | 0   | 1    |
| A33_A0568 | 4    | 1   | 1    |
| A33_A0569 | 4    | 0   | 3    |
| A33_A0571 | 12   | 3   | 6    |
| A33_A0572 | 9    | 2   | 11   |

|           |      |      |      |
|-----------|------|------|------|
| A33_A0573 | 2    | 0    | 0    |
| A33_A0574 | 4    | 1    | 3    |
| A33_A0575 | 4    | 2    | 1    |
| A33_A0576 | 8    | 7    | 1    |
| A33_A0577 | 7    | 6    | 7    |
| A33_A0578 | 282  | 193  | 249  |
| A33_A0579 | 728  | 466  | 370  |
| A33_A0580 | 569  | 404  | 364  |
| A33_A0581 | 35   | 32   | 34   |
| A33_A0582 | 6    | 5    | 6    |
| A33_A0583 | 2    | 2    | 5    |
| A33_A0584 | 0    | 0    | 0    |
| A33_A0585 | 5    | 5    | 4    |
| A33_A0586 | 6    | 9    | 0    |
| A33_A0587 | 5    | 4    | 7    |
| A33_A0588 | 3    | 4    | 4    |
| A33_A0589 | 2    | 1    | 1    |
| A33_A0590 | 1    | 0    | 2    |
| A33_A0591 | 3    | 3    | 5    |
| A33_A0592 | 2    | 0    | 1    |
| A33_A0593 | 0    | 0    | 0    |
| A33_A0594 | 0    | 0    | 1    |
| A33_A0595 | 1    | 3    | 1    |
| A33_A0596 | 1    | 0    | 4    |
| A33_A0597 | 0    | 1    | 1    |
| A33_A0598 | 10   | 17   | 10   |
| A33_A0599 | 2    | 5    | 3    |
| A33_A0600 | 6    | 6    | 5    |
| A33_A0601 | 8    | 6    | 11   |
| A33_A0602 | 2    | 2    | 1    |
| A33_A0603 | 4    | 5    | 4    |
| A33_A0604 | 2    | 1    | 4    |
| A33_A0605 | 4    | 4    | 2    |
| A33_A0606 | 2    | 0    | 4    |
| A33_A0607 | 6    | 4    | 5    |
| A33_A0608 | 8    | 6    | 11   |
| A33_A0609 | 18   | 11   | 25   |
| A33_A0610 | 6    | 1    | 6    |
| A33_A0611 | 37   | 22   | 22   |
| A33_A0612 | 23   | 11   | 15   |
| A33_A0613 | 339  | 214  | 398  |
| A33_A0614 | 4900 | 2139 | 3465 |
| A33_A0615 | 555  | 493  | 729  |
| A33_A0616 | 332  | 147  | 252  |
| A33_A0617 | 18   | 10   | 27   |
| A33_A0618 | 14   | 6    | 10   |
| A33_A0619 | 25   | 14   | 20   |
| A33_A0620 | 16   | 5    | 13   |

|           |    |     |    |
|-----------|----|-----|----|
| A33_A0621 | 18 | 12  | 11 |
| A33_A0622 | 22 | 9   | 20 |
| A33_A0623 | 8  | 5   | 5  |
| A33_A0624 | 22 | 13  | 32 |
| A33_A0625 | 45 | 7   | 33 |
| A33_A0626 | 14 | 4   | 19 |
| A33_A0627 | 0  | 0   | 0  |
| A33_A0628 | 15 | 0   | 14 |
| A33_A0629 | 17 | 8   | 16 |
| A33_A0630 | 11 | 5   | 6  |
| A33_A0631 | 4  | 0   | 2  |
| A33_A0632 | 0  | 0   | 0  |
| A33_A0633 | 15 | 13  | 19 |
| A33_A0634 | 4  | 3   | 4  |
| A33_A0635 | 39 | 31  | 54 |
| A33_A0637 | 24 | 12  | 15 |
| A33_A0638 | 11 | 1   | 0  |
| A33_A0639 | 2  | 0   | 0  |
| A33_A0640 | 0  | 2   | 0  |
| A33_A0641 | 21 | 14  | 11 |
| A33_A0642 | 13 | 4   | 13 |
| A33_A0643 | 0  | 8   | 2  |
| A33_A0644 | 28 | 28  | 18 |
| A33_A0645 | 7  | 12  | 8  |
| A33_A0646 | 0  | 0   | 0  |
| A33_A0647 | 9  | 0   | 6  |
| A33_A0648 | 0  | 0   | 0  |
| A33_A0649 | 23 | 22  | 49 |
| A33_A0650 | 16 | 4   | 8  |
| A33_A0651 | 23 | 11  | 46 |
| A33_A0652 | 2  | 2   | 0  |
| A33_A0653 | 83 | 102 | 59 |
| A33_A0654 | 41 | 27  | 52 |
| A33_A0655 | 73 | 46  | 85 |
| A33_A0656 | 0  | 0   | 0  |
| A33_A0657 | 9  | 6   | 18 |
| A33_A0658 | 67 | 68  | 62 |
| A33_A0659 | 29 | 15  | 29 |
| A33_A0660 | 3  | 1   | 1  |
| A33_A0661 | 17 | 10  | 21 |
| A33_A0662 | 37 | 21  | 28 |
| A33_A0663 | 29 | 11  | 25 |
| A33_A0664 | 7  | 0   | 2  |
| A33_A0665 | 27 | 12  | 36 |
| A33_A0666 | 11 | 6   | 6  |
| A33_A0667 | 0  | 0   | 0  |
| A33_A0668 | 0  | 0   | 0  |
| A33_A0669 | 5  | 0   | 0  |

|           |     |     |     |
|-----------|-----|-----|-----|
| A33_A0670 | 23  | 21  | 22  |
| A33_A0671 | 0   | 0   | 0   |
| A33_A0672 | 8   | 2   | 2   |
| A33_A0673 | 62  | 57  | 47  |
| A33_A0674 | 7   | 10  | 3   |
| A33_A0675 | 12  | 5   | 6   |
| A33_A0676 | 0   | 0   | 0   |
| A33_A0677 | 0   | 0   | 0   |
| A33_A0678 | 4   | 6   | 7   |
| A33_A0679 | 18  | 9   | 6   |
| A33_A0680 | 15  | 12  | 17  |
| A33_A0681 | 15  | 6   | 10  |
| A33_A0683 | 7   | 4   | 4   |
| A33_A0685 | 12  | 9   | 8   |
| A33_A0686 | 9   | 5   | 14  |
| A33_A0687 | 2   | 0   | 5   |
| A33_A0688 | 2   | 0   | 4   |
| A33_A0689 | 13  | 3   | 9   |
| A33_A0690 | 18  | 12  | 22  |
| A33_A0691 | 0   | 0   | 0   |
| A33_A0693 | 0   | 0   | 0   |
| A33_A0695 | 28  | 44  | 44  |
| A33_A0696 | 1   | 0   | 0   |
| A33_A0697 | 0   | 0   | 0   |
| A33_A0698 | 0   | 0   | 0   |
| A33_A0700 | 2   | 5   | 0   |
| A33_A0701 | 1   | 5   | 4   |
| A33_A0702 | 18  | 4   | 20  |
| A33_A0703 | 199 | 131 | 323 |
| A33_A0704 | 170 | 149 | 194 |
| A33_A0705 | 23  | 4   | 6   |
| A33_A0706 | 8   | 3   | 10  |
| A33_A0707 | 15  | 8   | 16  |
| A33_A0708 | 13  | 12  | 12  |
| A33_A0709 | 36  | 19  | 30  |
| A33_A0710 | 0   | 0   | 0   |
| A33_A0711 | 15  | 10  | 12  |
| A33_A0712 | 10  | 6   | 6   |
| A33_A0713 | 0   | 0   | 0   |
| A33_A0714 | 5   | 2   | 0   |
| A33_A0715 | 0   | 0   | 0   |
| A33_A0716 | 13  | 14  | 27  |
| A33_A0717 | 6   | 14  | 9   |
| A33_A0718 | 43  | 59  | 64  |
| A33_A0719 | 0   | 0   | 7   |
| A33_A0720 | 4   | 0   | 3   |
| A33_A0721 | 4   | 1   | 3   |
| A33_A0722 | 22  | 17  | 34  |

|           |     |     |     |
|-----------|-----|-----|-----|
| A33_A0725 | 4   | 2   | 4   |
| A33_A0726 | 3   | 0   | 0   |
| A33_A0727 | 7   | 5   | 14  |
| A33_A0728 | 16  | 12  | 23  |
| A33_A0729 | 22  | 15  | 11  |
| A33_A0730 | 32  | 15  | 34  |
| A33_A0731 | 0   | 0   | 0   |
| A33_A0732 | 15  | 12  | 43  |
| A33_A0733 | 77  | 53  | 51  |
| A33_A0734 | 9   | 7   | 3   |
| A33_A0735 | 44  | 34  | 48  |
| A33_A0736 | 10  | 5   | 11  |
| A33_A0737 | 0   | 0   | 0   |
| A33_A0738 | 22  | 21  | 21  |
| A33_A0739 | 0   | 0   | 0   |
| A33_A0740 | 0   | 0   | 0   |
| A33_A0741 | 0   | 0   | 0   |
| A33_A0742 | 10  | 8   | 5   |
| A33_A0744 | 23  | 11  | 32  |
| A33_A0745 | 21  | 8   | 10  |
| A33_A0746 | 36  | 10  | 33  |
| A33_A0747 | 103 | 42  | 69  |
| A33_A0748 | 0   | 2   | 0   |
| A33_A0749 | 2   | 0   | 3   |
| A33_A0750 | 17  | 6   | 17  |
| A33_A0751 | 6   | 2   | 0   |
| A33_A0752 | 2   | 1   | 2   |
| A33_A0753 | 13  | 3   | 18  |
| A33_A0754 | 0   | 0   | 0   |
| A33_A0755 | 0   | 0   | 3   |
| A33_A0756 | 6   | 2   | 5   |
| A33_A0757 | 9   | 4   | 5   |
| A33_A0758 | 1   | 0   | 2   |
| A33_A0759 | 22  | 21  | 21  |
| A33_A0760 | 4   | 0   | 6   |
| A33_A0761 | 0   | 0   | 0   |
| A33_A0762 | 12  | 4   | 18  |
| A33_A0763 | 107 | 77  | 83  |
| A33_A0764 | 35  | 15  | 25  |
| A33_A0765 | 1   | 1   | 1   |
| A33_A0766 | 15  | 8   | 27  |
| A33_A0767 | 4   | 0   | 15  |
| A33_A0768 | 26  | 16  | 17  |
| A33_A0769 | 0   | 0   | 0   |
| A33_A0770 | 37  | 23  | 16  |
| A33_A0771 | 126 | 143 | 144 |
| A33_A0772 | 28  | 30  | 28  |
| A33_A0773 | 30  | 18  | 27  |

|           |     |     |     |
|-----------|-----|-----|-----|
| A33_A0774 | 14  | 4   | 15  |
| A33_A0776 | 235 | 315 | 333 |
| A33_A0777 | 220 | 211 | 377 |
| A33_A0778 | 0   | 0   | 0   |
| A33_A0779 | 8   | 6   | 1   |
| A33_A0780 | 7   | 0   | 6   |
| A33_A0781 | 0   | 0   | 3   |
| A33_A0782 | 0   | 0   | 0   |
| A33_A0783 | 1   | 0   | 8   |
| A33_A0784 | 7   | 0   | 3   |
| A33_A0785 | 141 | 62  | 73  |
| A33_A0786 | 40  | 19  | 94  |
| A33_A0787 | 22  | 8   | 13  |
| A33_A0788 | 9   | 21  | 10  |
| A33_A0789 | 6   | 23  | 11  |
| A33_A0790 | 147 | 150 | 190 |
| A33_A0791 | 201 | 158 | 168 |
| A33_A0792 | 2   | 0   | 0   |
| A33_A0793 | 15  | 13  | 10  |
| A33_A0794 | 4   | 1   | 3   |
| A33_A0795 | 8   | 9   | 8   |
| A33_A0796 | 20  | 8   | 17  |
| A33_A0797 | 27  | 17  | 25  |
| A33_A0798 | 31  | 29  | 30  |
| A33_A0799 | 161 | 235 | 133 |
| A33_A0800 | 58  | 50  | 36  |
| A33_A0801 | 7   | 5   | 7   |
| A33_A0802 | 6   | 5   | 3   |
| A33_A0803 | 84  | 77  | 150 |
| A33_A0804 | 165 | 119 | 214 |
| A33_A0805 | 3   | 4   | 5   |
| A33_A0806 | 2   | 2   | 2   |
| A33_A0807 | 17  | 8   | 15  |
| A33_A0808 | 43  | 61  | 55  |
| A33_A0809 | 164 | 297 | 203 |
| A33_A0810 | 3   | 3   | 7   |
| A33_A0811 | 4   | 2   | 6   |
| A33_A0812 | 10  | 4   | 18  |
| A33_A0813 | 40  | 19  | 38  |
| A33_A0814 | 133 | 100 | 144 |
| A33_A0815 | 66  | 27  | 67  |
| A33_A0816 | 423 | 213 | 412 |
| A33_A0817 | 2   | 4   | 7   |
| A33_A0818 | 66  | 30  | 51  |
| A33_A0819 | 92  | 37  | 27  |
| A33_A0820 | 29  | 22  | 22  |
| A33_A0821 | 102 | 69  | 92  |
| A33_A0822 | 25  | 10  | 20  |

|           |      |      |      |
|-----------|------|------|------|
| A33_A0823 | 1779 | 1361 | 3642 |
| A33_A0824 | 291  | 112  | 172  |
| A33_A0825 | 11   | 0    | 2    |
| A33_A0826 | 27   | 12   | 17   |
| A33_A0827 | 1980 | 1681 | 3564 |
| A33_A0828 | 16   | 21   | 18   |
| A33_A0829 | 9    | 5    | 4    |
| A33_A0830 | 23   | 10   | 11   |
| A33_A0831 | 20   | 15   | 14   |
| A33_A0832 | 57   | 15   | 53   |
| A33_A0833 | 44   | 20   | 42   |
| A33_A0834 | 44   | 38   | 122  |
| A33_A0835 | 64   | 41   | 42   |
| A33_A0836 | 97   | 141  | 85   |
| A33_A0837 | 60   | 51   | 75   |
| A33_A0838 | 38   | 28   | 51   |
| A33_A0839 | 98   | 97   | 79   |
| A33_A0841 | 108  | 68   | 85   |
| A33_A0842 | 210  | 132  | 190  |
| A33_A0843 | 49   | 44   | 43   |
| A33_A0844 | 65   | 44   | 55   |
| A33_A0845 | 60   | 39   | 25   |
| A33_A0846 | 0    | 0    | 0    |
| A33_A0847 | 0    | 0    | 0    |
| A33_A0848 | 147  | 66   | 202  |
| A33_A0849 | 2    | 1    | 0    |
| A33_A0850 | 3    | 0    | 0    |
| A33_A0852 | 1    | 0    | 1    |
| A33_A0853 | 0    | 0    | 0    |
| A33_A0854 | 0    | 0    | 0    |
| A33_A0855 | 98   | 103  | 160  |
| A33_A0856 | 227  | 225  | 312  |
| A33_A0857 | 100  | 71   | 142  |
| A33_A0858 | 233  | 175  | 394  |
| A33_A0859 | 76   | 90   | 68   |
| A33_A0860 | 110  | 80   | 88   |
| A33_A0861 | 25   | 17   | 22   |
| A33_A0862 | 87   | 50   | 61   |
| A33_A0863 | 32   | 45   | 36   |
| A33_A0864 | 49   | 29   | 53   |
| A33_A0865 | 0    | 0    | 0    |
| A33_A0866 | 61   | 38   | 99   |
| A33_A0867 | 34   | 14   | 54   |
| A33_A0868 | 9    | 4    | 0    |
| A33_A0869 | 8    | 5    | 4    |
| A33_A0870 | 51   | 36   | 41   |
| A33_A0871 | 17   | 18   | 29   |
| A33_A0872 | 36   | 14   | 39   |

|           |      |      |      |
|-----------|------|------|------|
| A33_A0873 | 31   | 19   | 10   |
| A33_A0874 | 32   | 24   | 23   |
| A33_A0875 | 22   | 17   | 12   |
| A33_A0876 | 37   | 24   | 23   |
| A33_A0877 | 30   | 20   | 30   |
| A33_A0878 | 30   | 30   | 47   |
| A33_A0879 | 58   | 37   | 38   |
| A33_A0880 | 2086 | 2571 | 3373 |
| A33_A0881 | 0    | 0    | 0    |
| A33_A0882 | 27   | 15   | 36   |
| A33_A0883 | 1    | 1    | 2    |
| A33_A0884 | 5    | 8    | 5    |
| A33_A0885 | 16   | 12   | 23   |
| A33_A0886 | 6    | 9    | 5    |
| A33_A0887 | 3    | 2    | 1    |
| A33_A0888 | 57   | 107  | 55   |
| A33_A0889 | 3    | 3    | 1    |
| A33_A0891 | 3    | 3    | 2    |
| A33_A0892 | 339  | 291  | 207  |
| A33_A0893 | 125  | 140  | 169  |
| A33_A0894 | 42   | 16   | 73   |
| A33_A0895 | 2    | 0    | 0    |
| A33_A0896 | 43   | 14   | 41   |
| A33_A0897 | 10   | 3    | 6    |
| A33_A0898 | 100  | 44   | 78   |
| A33_A0899 | 51   | 38   | 48   |
| A33_A0900 | 106  | 76   | 57   |
| A33_A0901 | 37   | 55   | 62   |
| A33_A0902 | 57   | 53   | 55   |
| A33_A0903 | 22   | 24   | 17   |
| A33_A0904 | 28   | 21   | 19   |
| A33_A0905 | 181  | 179  | 212  |
| A33_A0906 | 128  | 102  | 109  |
| A33_A0907 | 0    | 0    | 0    |
| A33_A0908 | 5    | 5    | 4    |
| A33_A0909 | 15   | 8    | 23   |
| A33_A0910 | 421  | 328  | 324  |
| A33_A0911 | 18   | 18   | 14   |
| A33_A0912 | 9    | 10   | 16   |
| A33_A0913 | 17   | 9    | 10   |
| A33_A0914 | 17   | 11   | 25   |
| A33_A0915 | 11   | 10   | 11   |
| A33_A0916 | 8    | 7    | 5    |
| A33_A0917 | 37   | 59   | 44   |
| A33_A0918 | 12   | 4    | 5    |
| A33_A0919 | 0    | 0    | 0    |
| A33_A0920 | 0    | 0    | 0    |
| A33_A0921 | 52   | 37   | 32   |



|           |     |     |     |
|-----------|-----|-----|-----|
| A33_A0922 | 38  | 20  | 49  |
| A33_A0923 | 49  | 21  | 34  |
| A33_A0924 | 48  | 16  | 58  |
| A33_A0925 | 81  | 14  | 83  |
| A33_A0926 | 125 | 34  | 71  |
| A33_A0927 | 96  | 69  | 118 |
| A33_A0928 | 168 | 157 | 90  |
| A33_A0929 | 4   | 4   | 3   |
| A33_A0930 | 5   | 8   | 5   |
| A33_A0931 | 3   | 1   | 2   |
| A33_A0932 | 3   | 2   | 4   |
| A33_A0933 | 2   | 3   | 0   |
| A33_A0934 | 2   | 2   | 2   |
| A33_A0935 | 134 | 36  | 116 |
| A33_A0936 | 22  | 17  | 22  |
| A33_A0937 | 27  | 17  | 30  |
| A33_A0938 | 17  | 17  | 16  |
| A33_A0939 | 49  | 19  | 51  |
| A33_A0940 | 20  | 11  | 13  |
| A33_A0941 | 32  | 13  | 20  |
| A33_A0942 | 99  | 52  | 84  |
| A33_A0943 | 128 | 69  | 84  |
| A33_A0944 | 75  | 48  | 74  |
| A33_A0945 | 5   | 5   | 7   |
| A33_A0946 | 9   | 12  | 14  |
| A33_A0947 | 39  | 35  | 52  |
| A33_A0948 | 11  | 18  | 10  |
| A33_A0949 | 2   | 2   | 0   |
| A33_A0950 | 3   | 5   | 1   |
| A33_A0951 | 4   | 3   | 6   |
| A33_A0952 | 18  | 18  | 36  |
| A33_A0953 | 12  | 16  | 19  |
| A33_A0954 | 15  | 21  | 16  |
| A33_A0955 | 21  | 96  | 9   |
| A33_A0956 | 17  | 59  | 6   |
| A33_A0957 | 5   | 8   | 6   |
| A33_A0958 | 3   | 3   | 6   |
| A33_A0959 | 6   | 5   | 10  |
| A33_A0960 | 12  | 15  | 3   |
| A33_A0961 | 39  | 26  | 24  |
| A33_A0962 | 50  | 96  | 117 |
| A33_A0963 | 48  | 77  | 35  |
| A33_A0964 | 92  | 114 | 71  |
| A33_A0965 | 84  | 80  | 75  |
| A33_A0966 | 19  | 22  | 11  |
| A33_A0967 | 63  | 54  | 47  |
| A33_A0968 | 32  | 37  | 21  |
| A33_A0969 | 249 | 386 | 191 |

|           |      |     |     |
|-----------|------|-----|-----|
| A33_A0970 | 26   | 19  | 16  |
| A33_A0971 | 35   | 26  | 12  |
| A33_A0972 | 8    | 3   | 8   |
| A33_A0973 | 4    | 3   | 3   |
| A33_A0974 | 138  | 62  | 101 |
| A33_A0975 | 46   | 28  | 21  |
| A33_A0976 | 27   | 20  | 36  |
| A33_A0977 | 34   | 19  | 9   |
| A33_A0978 | 13   | 14  | 13  |
| A33_A0979 | 0    | 0   | 0   |
| A33_A0980 | 151  | 177 | 181 |
| A33_A0981 | 17   | 21  | 12  |
| A33_A0982 | 24   | 11  | 17  |
| A33_A0983 | 18   | 13  | 10  |
| A33_A0984 | 26   | 29  | 23  |
| A33_A0985 | 9    | 6   | 2   |
| A33_A0986 | 13   | 8   | 4   |
| A33_A0987 | 3    | 2   | 3   |
| A33_A0988 | 27   | 27  | 19  |
| A33_A0989 | 47   | 40  | 58  |
| A33_A0990 | 128  | 57  | 136 |
| A33_A0991 | 25   | 30  | 42  |
| A33_A0992 | 16   | 7   | 0   |
| A33_A0993 | 15   | 6   | 10  |
| A33_A0994 | 0    | 0   | 0   |
| A33_A0995 | 508  | 26  | 71  |
| A33_A0996 | 337  | 41  | 41  |
| A33_A0997 | 51   | 41  | 42  |
| A33_A0998 | 10   | 11  | 8   |
| A33_A0999 | 27   | 17  | 25  |
| A33_A1000 | 11   | 8   | 11  |
| A33_A1001 | 36   | 42  | 44  |
| A33_A1002 | 119  | 124 | 249 |
| A33_A1003 | 16   | 14  | 20  |
| A33_A1004 | 28   | 25  | 17  |
| A33_A1005 | 16   | 14  | 15  |
| A33_A1006 | 39   | 18  | 24  |
| A33_A1007 | 18   | 7   | 12  |
| A33_A1008 | 47   | 27  | 47  |
| A33_A1009 | 50   | 16  | 43  |
| A33_A1010 | 11   | 7   | 7   |
| A33_A1011 | 4114 | 162 | 830 |
| A33_A1012 | 49   | 10  | 15  |
| A33_A1013 | 44   | 41  | 39  |
| A33_A1014 | 34   | 38  | 46  |
| A33_A1015 | 86   | 68  | 72  |
| A33_A1016 | 83   | 47  | 56  |
| A33_A1017 | 18   | 31  | 27  |

|           |     |     |     |
|-----------|-----|-----|-----|
| A33_A1018 | 40  | 27  | 59  |
| A33_A1019 | 24  | 9   | 28  |
| A33_A1020 | 2   | 0   | 0   |
| A33_A1021 | 166 | 84  | 231 |
| A33_A1022 | 5   | 13  | 19  |
| A33_A1023 | 35  | 29  | 12  |
| A33_A1024 | 64  | 48  | 77  |
| A33_A1025 | 16  | 5   | 11  |
| A33_A1026 | 2   | 0   | 0   |
| A33_A1027 | 19  | 15  | 7   |
| A33_A1028 | 11  | 6   | 6   |
| A33_A1029 | 6   | 4   | 6   |
| A33_A1030 | 73  | 34  | 61  |
| A33_A1031 | 19  | 21  | 45  |
| A33_A1032 | 43  | 20  | 31  |
| A33_A1033 | 3   | 1   | 2   |
| A33_A1034 | 7   | 0   | 0   |
| A33_A1035 | 0   | 0   | 4   |
| A33_A1036 | 0   | 2   | 7   |
| A33_A1037 | 85  | 116 | 55  |
| A33_A1038 | 99  | 90  | 103 |
| A33_A1039 | 301 | 221 | 412 |
| A33_A1040 | 124 | 137 | 189 |
| A33_A1041 | 0   | 0   | 0   |
| A33_A1042 | 40  | 32  | 25  |
| A33_A1043 | 32  | 25  | 26  |
| A33_A1044 | 33  | 18  | 14  |
| A33_A1045 | 26  | 29  | 22  |
| A33_A1046 | 17  | 12  | 30  |
| A33_A1047 | 46  | 29  | 35  |
| A33_A1048 | 57  | 24  | 27  |
| A33_A1049 | 111 | 57  | 53  |
| A33_A1050 | 186 | 80  | 307 |
| A33_A1051 | 24  | 13  | 27  |
| A33_A1052 | 57  | 23  | 46  |
| A33_A1053 | 189 | 110 | 209 |
| A33_A1054 | 27  | 15  | 27  |
| A33_A1055 | 10  | 8   | 7   |
| A33_A1056 | 5   | 6   | 6   |
| A33_A1057 | 51  | 29  | 29  |
| A33_A1058 | 3   | 5   | 4   |
| A33_A1059 | 33  | 29  | 15  |
| A33_A1060 | 17  | 19  | 15  |
| A33_A1061 | 10  | 13  | 19  |
| A33_A1062 | 82  | 67  | 88  |
| A33_A1063 | 32  | 55  | 27  |
| A33_A1064 | 26  | 27  | 33  |
| A33_A1065 | 58  | 59  | 55  |

|           |      |     |     |
|-----------|------|-----|-----|
| A33_A1066 | 206  | 238 | 102 |
| A33_A1067 | 2    | 7   | 3   |
| A33_A1068 | 21   | 11  | 20  |
| A33_A1069 | 0    | 0   | 11  |
| A33_A1070 | 10   | 15  | 26  |
| A33_A1071 | 417  | 495 | 341 |
| A33_A1072 | 32   | 21  | 42  |
| A33_A1073 | 68   | 23  | 88  |
| A33_A1074 | 22   | 25  | 19  |
| A33_A1075 | 45   | 38  | 31  |
| A33_A1076 | 65   | 45  | 24  |
| A33_A1077 | 84   | 31  | 45  |
| A33_A1078 | 92   | 52  | 81  |
| A33_A1079 | 241  | 254 | 196 |
| A33_A1080 | 6    | 1   | 8   |
| A33_B0001 | 0    | 0   | 0   |
| A33_B0002 | 0    | 0   | 0   |
| A33_B0004 | 0    | 0   | 0   |
| A33_B0005 | 0    | 0   | 0   |
| A33_B0006 | 1259 | 526 | 480 |
| A33_B0007 | 1406 | 805 | 609 |
| A33_B0008 | 444  | 312 | 258 |
| A33_B0009 | 573  | 388 | 306 |
| A33_B0010 | 221  | 283 | 532 |
| A33_B0011 | 28   | 33  | 42  |
| A33_B0012 | 200  | 149 | 193 |
| A33_B0013 | 96   | 114 | 146 |
| A33_B0014 | 48   | 48  | 54  |
| A33_B0015 | 42   | 45  | 46  |
| A33_B0016 | 2    | 0   | 0   |
| A33_B0017 | 568  | 487 | 581 |
| A33_B0018 | 16   | 15  | 12  |
| A33_B0019 | 18   | 23  | 12  |
| A33_B0020 | 76   | 50  | 73  |
| A33_B0021 | 131  | 91  | 107 |
| A33_B0024 | 139  | 55  | 94  |
| A33_B0025 | 371  | 168 | 203 |
| A33_B0026 | 0    | 0   | 0   |
| A33_B0028 | 0    | 0   | 0   |
| A33_B0029 | 0    | 0   | 0   |
| A33_B0031 | 0    | 0   | 0   |
| A33_B0032 | 17   | 12  | 12  |
| A33_B0033 | 29   | 39  | 36  |
| A33_B0034 | 40   | 35  | 40  |
| A33_B0035 | 50   | 42  | 45  |
| A33_B0036 | 422  | 466 | 356 |
| A33_B0037 | 408  | 276 | 387 |
| A33_B0038 | 288  | 212 | 161 |

|           |      |     |     |
|-----------|------|-----|-----|
| A33_B0039 | 652  | 377 | 589 |
| A33_B0040 | 515  | 436 | 376 |
| A33_B0041 | 62   | 33  | 70  |
| A33_B0042 | 52   | 25  | 47  |
| A33_B0043 | 39   | 30  | 36  |
| A33_B0044 | 267  | 129 | 306 |
| A33_B0045 | 65   | 30  | 39  |
| A33_B0046 | 37   | 16  | 21  |
| A33_B0047 | 32   | 7   | 13  |
| A33_B0048 | 53   | 9   | 17  |
| A33_B0049 | 427  | 197 | 293 |
| A33_B0050 | 1050 | 510 | 591 |
| A33_B0052 | 1    | 1   | 4   |
| A33_B0053 | 0    | 0   | 0   |

---

**TABLE S4.** AM-19226 T3SS genes.

| Locus tag | Gene product | RPKMs (replicate 1) |                 |                 | Fold-change         |                     |
|-----------|--------------|---------------------|-----------------|-----------------|---------------------|---------------------|
|           |              | WT                  | $\Delta vttR_A$ | $\Delta vttR_B$ | WT/ $\Delta vttR_A$ | WT/ $\Delta vttR_B$ |
| A33_1660a | AcfA         | 7                   | 11              | 4               | 0.6                 | 1.8                 |
| A33_1662  | VopE         | 2                   | 1               | 2               | 2.0                 | 1.0                 |
| A33_1662a | CHP          | 566                 | 1               | 5               | 566.0               | 113.2               |
| A33_1663  | VopX         | 346                 | 3               | 7               | 115.3               | 49.4                |
| A33_1664  | VttR-A       | 53                  | 0               | 25              | -                   | 2.1                 |
| A33_1664a | CHP          | 0                   | 0               | 0               | -                   | -                   |
| A33_1665  | CHP          | 417                 | 5               | 11              | 83.4                | 37.9                |
| A33_1666  | VcsS2        | 108                 | 4               | 3               | 27.0                | 36.0                |
| A33_1667  | CHP          | 103                 | 5               | 5               | 20.6                | 20.6                |
| A33_1668  | HP           | 120                 | 9               | 6               | 13.3                | 20.0                |
| A33_1669  | VcsN2        | 118                 | 16              | 20              | 7.4                 | 5.9                 |
| A33_1670  | VcsC2        | 239                 | 10              | 13              | 23.9                | 18.4                |
| A33_1671  | CHP          | 434                 | 11              | 8               | 39.5                | 54.3                |
| A33_1672  | VcsT2        | 101                 | 2               | 2               | 50.5                | 50.5                |
| A33_1673  | VcsR2        | 141                 | 1               | 1               | 141.0               | 141.0               |
| A33_1674  | HP           | 9080                | 28              | 33              | 324.3               | 275.2               |
| A33_1675  | VttR-B       | 95                  | 28              | 0               | 3.4                 | -                   |
| A33_1676  | VcsQ2        | 775                 | 51              | 89              | 15.2                | 8.7                 |
| A33_1677  | HP           | 742                 | 48              | 41              | 15.5                | 18.1                |
| A33_1678  | VopH         | 168                 | 7               | 10              | 24.0                | 16.8                |
| A33_1679  | HP           | 159                 | 9               | 10              | 17.7                | 15.9                |
| A33_1680  | VopA         | 191                 | 9               | 11              | 21.2                | 17.4                |
| A33_1681  | VcsU2        | 201                 | 5               | 11              | 40.2                | 18.3                |
| A33_1682  | VcsV2        | 183                 | 9               | 9               | 20.3                | 20.3                |
| A33_1683  | HP           | 273                 | 5               | 5               | 54.6                | 54.6                |
| A33_1684  | VopM         | 86                  | 12              | 11              | 7.2                 | 7.8                 |
| A33_1685  | CHP          | 107                 | 3               | 3               | 35.7                | 35.7                |
| A33_1686  | CHP          | 135                 | 1               | 1               | 135.0               | 135.0               |
| A33_1687  | VopI         | 136                 | 4               | 2               | 34.0                | 68.0                |
| A33_1688  | CHP          | 1656                | 32              | 24              | 51.8                | 69.0                |
| A33_1689  | VspD         | 384                 | 12              | 6               | 32.0                | 64.0                |
| A33_1690  | VopW         | 74                  | 10              | 8               | 7.4                 | 9.3                 |
| A33_1691  | HP           | 79                  | 3               | 3               | 26.3                | 26.3                |
| A33_1692  | CHP          | 97                  | 7               | 9               | 13.9                | 10.8                |
| A33_1693  | VcsJ2        | 78                  | 9               | 9               | 8.7                 | 8.7                 |
| A33_1694  | CHP          | 110                 | 3               | 4               | 36.7                | 27.5                |
| A33_1695  | HP           | 183                 | 79              | 74              | 2.3                 | 2.5                 |
| A33_1696  | VopF         | 43                  | 7               | 4               | 6.1                 | 10.8                |
| A33_1697  | VopG         | 15                  | 0               | 1               | -                   | 15.0                |
| A33_1698  | AcfC         | 36                  | 5               | 3               | 7.2                 | 12.0                |
| A33_1699  | VopK         | 6                   | 2               | 1               | 3.0                 | 6.0                 |

|           |       |     |    |    |     |     |
|-----------|-------|-----|----|----|-----|-----|
| A33_1700  | VopY  | 53  | 7  | 9  | 7.6 | 5.9 |
| A33_1701  | AcfD  | 105 | 22 | 25 | 4.8 | 4.2 |
| A33_1702  | TRH   | 0   | 0  | 0  | -   | -   |
| A33_1703  | CHP   | 57  | 37 | 20 | 1.5 | 2.9 |
| A33_1704  | VopZ  | 6   | 1  | 0  | 6.0 | -   |
| A33_1704a | ORF58 | 0   | 0  | 0  | -   | -   |
| A33_1705  | HP    | 19  | 3  | 4  | 6.3 | 4.8 |
| A33_1706  | CHP   | 28  | 18 | 11 | 1.6 | 2.5 |

CHP, Conserved hypothetical protein; HP, Hypothetical protein
